# Supplementary material for: Theileria parva antigens recognized by CD8+ T cells show varying degrees of diversity in buffalo-derived infected cell lines
Source: PubMed Central journal article supplement (PMC6126638; doi:10.1017/s0031182018000264), 2018-05-06
Supplement: NIHMS76139-supplement-Supplementary_Material.pdf [file NIHMS76139-supplement-Supplementary_Material.pdf]

**Table S1: PCR cycling conditions**

|                      | <b>Initiation</b> | <b>Denaturation</b>       | <b>Annealing</b> | <b>Extension</b> | <b>Final Extension</b> | <b>Hold</b> |
|----------------------|-------------------|---------------------------|------------------|------------------|------------------------|-------------|
| <b>Tp1, Tp2</b>      | 95°C, 11 min      | 41 cycles:<br>95°C, 1 min | 50°C, 1 min      | 72°C, 1 min      | 72°C, 10 min           | 10°C        |
| <b>Tp3, Tp4, Tp7</b> | 95°C, 11 min      | 43 cycles:<br>95°C, 30 s  | 50°C, 1 min      | 72°C, 1.5 min    | 72°C, 10 min           | 10°C        |
| <b>Tp5</b>           | 95°C, 11 min      | 40 cycles:<br>95°C, 30 s  | 50°C for 45s     | 72°C, 30 s       | 72°C, 10 min           | 10°C        |
| <b>Tp6</b>           | 95°C, 11 min      | 42 cycles:<br>95°C, 30 s  | 55°C, 1 min      | 72°C, 1.5 min    | 72°C, 10 min           | 10°C        |
| <b>Tp8, Tp10</b>     | 95°C, 11 min      | 40 cycles:<br>95°C, 30 s  | 55°C, 1 min      | 72°C, 2 min      | 72°C, 10 min           | 10°C        |
| <b>Tp9</b>           | 95°C, 11 min      | 30 cycles:<br>95°C, 30 s  | 55°C, 1 min      | 72°C, 1.5 min    | 72°C, 10 min           | 10°C        |

Table S2a: Stabilate information and accession numbers

| Sample ID                              | Stabilate Name           | Tp1      | Tp2 <sup>2</sup> | Tp3      | Tp4      | Tp5      | Tp6      | Tp7      | Tp8      | Tp10     |
|----------------------------------------|--------------------------|----------|------------------|----------|----------|----------|----------|----------|----------|----------|
| <b>Buffalo-derived <i>T. parva</i></b> |                          |          |                  |          |          |          |          |          |          |          |
| BD1                                    | Mara 3 <sup>1</sup>      | JF451995 | JF451900         | KY556754 | KY556860 | KY556797 | KY581701 | KY556818 | KY556832 | KY556721 |
| BD2                                    | Mara 4 <sup>1</sup>      | JF451954 | JF451901         | KY556755 | -        | KY556798 | KY581702 | KY556821 | -        | -        |
| BD3                                    | Mara 18 <sup>1</sup>     | JF451996 | JF451902         | KY556756 | KY556877 | KY556799 | KY581703 | KY556819 | -        | KY556722 |
| BD4                                    | Mara 30 <sup>1</sup>     | JF451955 | JF451903         | KY556758 | KY556878 | KY556781 | KY581704 | KY556803 | KY556834 | KY556723 |
| BD5                                    | Mara 32 <sup>1</sup>     | JF451956 | JF451904         | KY556761 | KY556879 | KY556782 | KY581705 | KY556817 | KY556835 | KY556724 |
| BD6                                    | Mara 42 <sup>1</sup>     | JF451997 | JF451905         | KY556760 | KY556882 | KY556800 | KY581706 | KY556802 | KY556838 | KY556726 |
| BD7                                    | 6998 <sup>1,2</sup>      | JF451957 | JF451906         | KY556769 | KY556869 | KY556791 | KY581716 | KY556809 | KY556849 | KY556734 |
| BD8                                    | 6999 <sup>2</sup>        | JF451998 | JF451898         | KY556771 | KY556870 | KY556792 | KY581718 | KY556811 | KY556851 | KY556736 |
| BD9                                    | 7001 <sup>2</sup>        | JF451999 | JF451907         | KY556772 | KY556872 | KY556793 | KY581720 | KY556812 | -        | KY556737 |
| BD10                                   | 7546 <sup>3</sup>        | JF452000 | JF451908         | KY556775 | KY556875 | KY556795 | KY581723 | KY556816 | -        | KY556739 |
| BD14                                   | 7014 <sup>2</sup>        | JF451958 | JF451912         | KY556773 | -        | KY556794 | KY581721 | KY556813 | KY556854 | KY556738 |
| BD15                                   | 7698 <sup>3</sup>        | JF451991 | JF451913         | KY556776 | KY556876 | KY556796 | KY581724 | KY556829 | KY556856 | KY556740 |
| BD16                                   | 7344 <sup>3</sup>        | JF452003 | JF451899         | KY556774 | KY556874 | -        | KY581722 | KY556815 | KY556853 | -        |
| BD17                                   | Mara 41 <sup>1</sup>     | -        | -                | KY556759 | KY556881 | -        | -        | KY556820 | KY556837 | KY556725 |
| BD18                                   | 4740 <sup>4</sup>        | KY556886 | KY556753         | KY556762 | KY556861 | -        | KY581707 | KY556804 | KY556839 | KY556727 |
| BD19                                   | 5012 <sup>6</sup>        | KY556887 | KY556744         | KY556763 | KY556862 | KY556784 | KY581708 | KY556801 | KY556840 | KY556728 |
| BD20                                   | 5489 <sup>4</sup>        | KY556888 | KY556745         | KY556764 | KY556863 | -        | KY581709 | KY556805 | KY556841 | KY556729 |
| BD21                                   | 6666 <sup>2</sup>        | KY556889 | KY556746         | KY556765 | KY556864 | -        | KY581711 | KY556806 | KY556843 | KY556730 |
| BD22                                   | 6807 <sup>2</sup>        | KY556890 | -                | -        | KY556865 | KY556785 | -        | KY556807 | KY556844 | KY556731 |
| BD23                                   | 6818 <sup>2</sup>        | KY556891 | -                | KY556766 | KY556866 | KY556786 | KY581712 | KY556808 | KY556845 | -        |
| BD24                                   | 6819 <sup>1</sup>        | KY556892 | KY556747         | KY556767 | KY556867 | KY556787 | KY581713 | KY556828 | KY556846 | KY556732 |
| BD25                                   | 6998 cl. 11 <sup>3</sup> | KY556893 | KY556748         | KY556770 | KY556868 | -        | KY581717 | KY556810 | KY556850 | KY556735 |
| BD26                                   | 7065 <sup>2</sup>        | -        | -                | -        | KY556873 | -        | KY581727 | KY556814 | KY556855 | -        |
| <b>Cattle-derived <i>T. parva</i></b>  |                          |          |                  |          |          |          |          |          |          |          |
| CD16                                   | Tc867 Bt106 <sup>3</sup> | KY556896 | KY556752         | KY556779 | KY556885 | -        | KY581726 | -        | KY556859 | KY556743 |
| CD17                                   | Tc841 IL57 <sup>3</sup>  | KY556897 | KY556751         | KY556778 | KY556884 | -        | KY581725 | KY556831 | KY556858 | KY556742 |

---

|             |                               |          |          |          |          |   |   |          |          |          |
|-------------|-------------------------------|----------|----------|----------|----------|---|---|----------|----------|----------|
| <b>CD28</b> | <i>Tc120F344</i> <sup>5</sup> | KY556895 | KY556750 | KY556777 | KY556883 | - | - | KY556830 | KY556857 | KY556741 |
|-------------|-------------------------------|----------|----------|----------|----------|---|---|----------|----------|----------|

---

Italicized accession numbers indicate previously published sequences. – indicates samples were not run or no sequence data was available. <sup>1</sup> Conrad et al., 1987, <sup>2</sup> Baldwin et al. 1988, <sup>3</sup> Pelle et al., 2011, <sup>4</sup> ILRI biorepository, <sup>5</sup> Pelle, personal communication, <sup>4</sup> Grootenhuis et al., 1987, <sup>6</sup> unknown origin.

Table S2b: Tp9 Accession numbers

| Sample ID                              | Stabilate name | Genomic DNA <sup>1</sup> | Cloned DNA <sup>1</sup> |
|----------------------------------------|----------------|--------------------------|-------------------------|
| <b>Buffalo-derived <i>T. parva</i></b> |                |                          |                         |
| <b>BD1</b>                             | Mara 3         | KY563669                 | KY563670                |
| <b>BD2</b>                             | Mara 4         | -                        | KY563671                |
| <b>BD3</b>                             | Mara 18        | KY563673                 | KY563672                |
| <b>BD4</b>                             | Mara 30        | KY563675                 | KY563674                |
| <b>BD5</b>                             | Mara 32        | -                        | KY563676                |
| <b>BD6</b>                             | Mara 42        | KY563678                 | KY563677                |
| <b>BD7</b>                             | 6998           | KY563682                 | KY563683                |
| <b>BD8</b>                             | 6999           | -                        | KY563685                |
| <b>BD9</b>                             | 7001           | -                        | KY563686                |
| <b>BD10</b>                            | 7546           | -                        | KY563690                |
| <b>BD14</b>                            | 7014           | -                        | KY563687                |
| <b>BD15</b>                            | 7698           | -                        | KY563691                |
| <b>BD16</b>                            | 7344           | KY563689                 | KY563688                |
| <b>BD18</b>                            | 4740           | KY563679                 | -                       |
| <b>BD19</b>                            | 5012           | KY563680                 | -                       |
| <b>BD25</b>                            | 6998 cl. 11    | -                        | KY563684                |
| <b>Cattle-derived <i>T. parva</i></b>  |                |                          |                         |
| <b>CD16</b>                            | Tc 867 Bt106   | -                        | KY563694                |
| <b>CD17</b>                            | Tc 841 IL57    | -                        | KY563693                |
| <b>CD28</b>                            | Tc 120 F344    | -                        | KY563692                |

Table S3a: Tp1 nucleotide variant Clustal alignment

|                     |                                                                      |     |
|---------------------|----------------------------------------------------------------------|-----|
| TP03_0849 (genomic) | <u>TATGGCCACTTCAATTGCATTTGCC</u> GCTGATCCTGGATTCTGTTATTTTCTATTAATACC | 720 |
| XM_757880 (mRNA)    | TATGGCCACTTCAATTGCATTTGCCGCTGATCCTGGATTCTGTTATTTTCTATTAATACC         | 720 |
| V1 (3)              | -----GCTGATCCTGGATTCTGTTATTTTCTATTAATACC                             | 35  |
| V2 (1)              | -----GCTGATCCTGGATTCTGTTATTTTCTATTAATACC                             | 35  |
| V13 (2)             | -----GCTGATCCTGGATTCTGTTATTTTCTATTAATACC                             | 35  |
| V36 (1)             | -----GCTGATCCTGGATTCTGTTATTTTCTATTAATACC                             | 35  |
| V37 (1)             | -----GCTGATCCTGGATTCTGTTATTTTCTATTAATACC                             | 35  |
| V38 (1)             | -----TCTGATCCTGGATTCTGTTATTTTCTATTAATACC                             | 35  |
| V39 (1)             | -----GCTGATCCTGGATTCTGTTATTTTCTATTAATACC                             | 35  |
| V40 (1)             | -----GCTGATCCTGGATTCTGTTATTTTCTATTAATACC                             | 35  |
|                     | *****                                                                |     |
| TP03_0849 (genomic) | AGGCCCTGACTCGAAACCAATATTCTTCAAAAACGACGGAGATAAATTTTTACGTTGCGT         | 780 |
| XM_757880 (mRNA)    | AGGCCCTGACTCGAAACCAATATTCTTCAAAAACGACGGAGATAAATTTTTACGTTGCGT         | 780 |
| V1 (3)              | AGGCCCTGACTCGAAACCAATATTCTTCAAAAACGACGGAGATAAATTTTTACGTTGCGT         | 95  |
| V2 (1)              | AGGCCCTGACTCGAAACCCATATTCTTCAAAAACGACGGAGATAAATTTTTACGTTGCGT         | 95  |
| V13 (2)             | AGGCCCTGACTCGAAACCTATATTCTTCAAAAACGACGGAGATAAATTTTTACGTTGCGT         | 95  |
| V36 (1)             | AGGCCCTGACTCGAAACCAATATTCTTCAAAAACGACGGAGATAAATTTTTACGTTGCGT         | 95  |
| V37 (1)             | AGGCCCTGACTCGAAACCAATATTCTTCAAAAACGACGGAGATAAATTTTTACGTTGCGT         | 95  |
| V38 (1)             | AGGCCCTGACTCGAAACCTATATTCTTCAAAAACGACGGAGATAAATTTTTACGTTGCGT         | 95  |
| V39 (1)             | AGGCCCTGACTCGAAACCAATATTCTTCAAAAACGACGGAGATAAATTTTTACGTTGCGT         | 95  |
| V40 (1)             | AGGCCCTGACTCGAAACCTATATTCTTCAAAAACGACGGAGATAAATTTTTACGTTGCGT         | 95  |
|                     | *****                                                                |     |
| TP03_0849 (genomic) | AGGGTATCCAAAGGTTAAAGAAGAAATGCTAGAAATGGCTACAAAATTC AATAGACTACC        | 840 |
| XM_757880 (mRNA)    | AGGGTATCCAAAGGTTAAAGAAGAAATGCTAGAAATGGCTACAAAATTC AATAGACTACC        | 840 |
| V1 (3)              | AGGGTATCCAAAGGTTAAAGAAGAAATGCTAGAAATGGCTACAAAATTC AATAGACTACC        | 155 |
| V2 (1)              | AGGGTATCCAAAGGTTAAAGAAGAAAT TATAGAAATGGCTACAAAATTC AATAGACTACC       | 155 |
| V13 (2)             | AGGGTATCCAAAGGTTAAAGAAGAAATGCTAGAAATGGCTACAAAATTC AATAGACTACC        | 155 |
| V36 (1)             | AGGGTATCCAAAGGTTAAAGAAGAAATGCTAGAAATGGCTACAAAATTC AATAGACTACC        | 155 |
| V37 (1)             | AGGGTATCCAAAGGTTAAAGAAGAAATGCTAGAAATGGCTACAAAATTC AATAGACTACC        | 155 |
| V38 (1)             | AGGGTATCCAAAGGTTAAAGAAGAAATGCTAGAAATGGCTACAAAATTC AATAGATTACC        | 155 |
| V39 (1)             | AGGGTATCCAAAGGTTAAAGAAGAAATGCTAGAAATGGCTACAAAATTC AATAGATTACC        | 155 |
| V40 (1)             | AGGGTATCCAAAGGTTAAAGAAGAAATGCTAGAAATGGCTACAAAATTC AATAGACTACC        | 155 |
|                     | *****                                                                |     |
| TP03_0849 (genomic) | AAAGGGCGTGGAAATACCTGCACCTCCAGGAGTAAAACCAGAGGCTCCCACACCTACACC         | 900 |
| XM_757880 (mRNA)    | AAAGGGCGTGGAAATACCTGCACCTCCAGGAGTAAAACCAGAGGCTCCCACACCTACACC         | 900 |
| V1 (3)              | AAAGGGCGTGGAAATACCTGCACCTCCAGGAGTAAAACCAGAGGCTCCCACACCTACACC         | 215 |

|                     |                                                                            |      |
|---------------------|----------------------------------------------------------------------------|------|
| V2 (1)              | AAAGGGCGTGGAAATACCTGCACCTCCAGGAGTAAAACCAGAGGCTCCCACACCTACACC               | 215  |
| V13 (2)             | AAAGGGCATGGAAATACCTGCACCTCCAGGAGTAAAACCAGAGGCTCCCACACCTACACC               | 215  |
| V36 (1)             | AAAGGGCATGGAAATACCTTCACCTCCAGGAGTAAAACCAGAGGCTCCCACACCTACACC               | 215  |
| V37 (1)             | AAAGGGCATGGAAATACCTTCACCTCCAGGAGTAAAACCAGAGGCTCCCACACCTACACC               | 215  |
| V38 (1)             | AAAGGGCGTGGAAATACCTGCACCTCCAGGAGTAAAACCAGAGGCTCCCACACCTACACC               | 215  |
| V39 (1)             | AAAGGGCGTGGAAATACCTGCACCTCCAGGAGTAAAACCAGAGGCTCCCACACCTACACC               | 215  |
| V40 (1)             | AAAGGGCATGGAAATACCTGCACCTCCAGGAGTAAAACCAGAGGCTCCCACACCTACACC<br>*****      | 215  |
| TP03_0849 (genomic) | AACGACAATAACTCCTTCTGTACCTCCTACTATAACCAACGCCAATAACTCCTTCGGCACC              | 960  |
| XM_757880 (mRNA)    | AACGACAATAACTCCTTCTGTACCTCCTACTATAACCAACGCCAATAACTCCTTCGGCACC              | 960  |
| V1 (3)              | AACGACAATAACTCCTTCTGTACCTCCTACTATAACCAACGCCAATAACTCCTTCGGCACC              | 275  |
| V2 (1)              | AACGACAATAACTCCTTCTGTACCTCCTACTATAACCAACGCCAATAACTCCTTCGGCACC              | 275  |
| V13 (2)             | AACGACAATAACTCCTTCTGTACCTCCTACTATAACCAACTCCAATAACTCCTTCTGCACC              | 275  |
| V36 (1)             | AACGACAATAACTCCTTCTGTACCTCCTACTATAACCAACTCCAATAACTCCTTCGGCACC              | 275  |
| V37 (1)             | AACGACAATAACTCCTTCTGTACCTCCTACTATAACCAACTCCAATAACTCCTTCGGCACC              | 275  |
| V38 (1)             | AACGACAATAACTCCTTCTGTACCTCCTACTATAACCAACGCCAATAACTCCTTCGGCACC              | 275  |
| V39 (1)             | AACTCCAATA-----ACTCCTTCTGCACC                                              | 239  |
| V40 (1)             | AACGACAATAACTCCTTCTGTACCTCCTACTATAACCAACTCCAATAACTCCTTCTGCACC<br>*** ***** | 273  |
| TP03_0849 (genomic) | TCCTA-----CTACACCACCTACGGGACTAAATTTTAACTTGACAGTTCAGAA                      | 1008 |
| XM_757880 (mRNA)    | TCCTA-----CTACACCACCTACGGGACTAAATTTTAACTTGACAGTTCAGAA                      | 1008 |
| V1 (3)              | TCCTA-----CTACACCACCTACGGGACTAAATTTTAACTTGACAGTTCAGAA                      | 323  |
| V2 (1)              | TCCTA-----CTACACCACCTACGGGACTAAATTTTAACTTGACAGTTCAGAA                      | 323  |
| V13 (2)             | TCCTTCTGCACCTCCTACTACACCACCTAAGGGACTAAATTTTAACTTGACACTTCAGAA               | 335  |
| V36 (1)             | TCCTACTACACCACCTACTACACCACCTACGGGACTAAATTTTAACTTGACAGTTCAGAA               | 335  |
| V37 (1)             | TCCTACTACACCTCCTACTACACCACCTAAGGGACTAAATTTTAACTTGACAGTTCAGAA               | 335  |
| V38 (1)             | TCCTA-----CTACACCAACTACGGGACTAAATTTTAACTTGACACGTCAGAA                      | 323  |
| V39 (1)             | TCCTACTACACCTCCTACTACACCACCTAAGGGACTAAATTTTAACTTGACAGTTCAGAA               | 299  |
| V40 (1)             | TCCTA-----CTACACCACCTACGGGACTAAATTTTAACTTGACACTTCAGAA<br>*****             | 323  |
| TP03_0849 (genomic) | CAAATTCATGATAGGTTTCGCAAGAAGTTAAGTTAAATATAACTCACGAATACGAGGGTGT              | 1068 |
| XM_757880 (mRNA)    | CAAATTCATGATAGGTTTCGCAAGAAGTTAAGTTAAATATAACTCACGAATACGAGGGTGT              | 1068 |
| V1 (3)              | CAAATTCATGATAGGTTTCGCAAGAAGTTAAGTTAAATATAACTCACGAATACGAGGGTGT              | 383  |
| V2 (1)              | CAAATTCATGGTAGGTTTCGCAAGAAGTTAAGTTAAATATAACTCACGAATACGATGGTGT              | 383  |
| V13 (2)             | CAAATTCATGATAGGTTTCGCAAGAAGTTAAGTTAAGTATAACTCACGAATACGATGGTGT              | 395  |
| V36 (1)             | CAAATTCATGGTAGGTTTCGCAAGAAGTTAAGTTAAGTATAACTTACGAATACGATGGTGT              | 395  |
| V37 (1)             | CAAATTCATGGTAGGCTCGCAAGAAGTTAAGTTAAGTATAACTTACGAATACGATGGTGT               | 395  |
| V38 (1)             | CAAATTCATGATAGGTTTCGCAAGAAGTTAAGTTAAATATAACTTACGAATACGATGGTGT              | 383  |

|                     |                                                                                      |      |
|---------------------|--------------------------------------------------------------------------------------|------|
| V39 (1)             | CAAATTCATGGTAGGTTTCGCAAGAAGTTAAGTTAAATATAACTCACGAATACGAGGGTGT                        | 359  |
| V40 (1)             | CAAATTCATGATAGGTTTCGCAAGAAGTTAAGTTAAGTATAACTCACGAATACGATGGTGT                        | 383  |
|                     | *****                                                                                |      |
| TP03_0849 (genomic) | ATAC <b><u><i>GAAGCTCATAAATATTTTCATT</i></u></b> GAAAGGGGCAGCTTTACCCCTACCTCATTCTCAAT | 1128 |
| XM_757880 (mRNA)    | ATACGAAGCTCATAAATATTTTCATTGAAAGGGGCAGCTTTACCCCTACCTCATTCTCAAT                        | 1128 |
| V1 (3)              | ATAC-----                                                                            | 387  |
| V2 (1)              | ATAC-----                                                                            | 387  |
| V13 (2)             | ATAC-----                                                                            | 399  |
| V36 (1)             | ATAC-----                                                                            | 399  |
| V37 (1)             | ATAC-----                                                                            | 399  |
| V38 (1)             | ATAC-----                                                                            | 387  |
| V39 (1)             | ATAC-----                                                                            | 363  |
| V40 (1)             | ATAC-----                                                                            | 387  |
|                     | ****                                                                                 |      |

Primer regions are in bold, underlined and italicized text.







|                     |                                                                |     |
|---------------------|----------------------------------------------------------------|-----|
| V46 (1)             | TAGGGAGAAATCATGGTCTTAAACCAAACCAAGATTAGAGAGTGTATTTGAAGATCTTG    | 208 |
| V47 (1)             | TAGCTAGAAGGTTTTGGTATTAGACCTGGAACAAAAACAGAAAAATTCTTAAAAGAACTTA  | 208 |
| V48 (2)             | TAGGTAGAAGGTTTTGGTATTAGACCTGGAACAAAAACAGAAAAATTCTTAAAAGAACTTA  | 208 |
| V49 (1)             | TAGGTAGAATGCATGGTCTTAAACGACTCCAAAAGTAGAGAGAGTCTTAGAAGATCTTG    | 208 |
|                     | *** *.** :**** *:*.** . :.**: * *** ..: * :..:***:**           |     |
| TP01_0056 (genomic) | AAACACTGTTTGGAAAACACGGTCTTGGTGGTATTAGTAAAGATTGTCTTAAATGTTTTG   | 417 |
| XM_765583 (mRNA)    | AAACACTGTTTGGAAAACACGGTCTTGGTGGTATTAGTAAAGATTGTCTTAAATGTTTTG   | 417 |
| V1 (2)              | AAACACTGTTTGGAAAACACGGTCTTGGTGGTATTAGTAAAGATTGTCTTAAATGTTTTG   | 268 |
| V44 (1)             | CTAGACTTCTTGAAAAACCGGTATTATAGGAGTTAGTGAGTCTTGTCTTAGTTGTTTTG    | 268 |
| V45 (1)             | CTACTCTTCTTACACAACCTAGGTATTACAGGAATTAGAGAACAATGTCTTGCCTGTTTTG  | 271 |
| V46 (1)             | AAAAACTGTTTGGAAAACACGGTCTTGGTGGTATTAGTAAAGATTGTCTTACTTGTTTTTG  | 268 |
| V47 (1)             | CTAAATTATTTACAGAAATTGGTATTACAGGTGTTGGTGAGAAGTGCCTCGAATGTTTAG   | 268 |
| V48 (2)             | CTAAATTATTTACAGAAATTGGTATTACAGGTGTTGGTGAGAAGTGCCTCGAATGTTTAG   | 268 |
| V49 (1)             | AAACACTGTTTGGAAAACCGGTCTTGGTGGTATTAGTAAAGATTGTCTTAAATGTTTTG    | 268 |
|                     | * : * ** . * ** : **.*. :** .* .*:... . ** ** *****:*          |     |
| TP01_0056 (genomic) | CACAAAGCCTAGTGTGCGTATTAATGAAATGTAGAGGAGCATGTCTCAAAGGACCATGTA   | 477 |
| XM_765583 (mRNA)    | CACAAAGCCTAGTGTGCGTATTAATGAAATGTAGAGGAGCATGTCTCAAAGGACCATGTA   | 477 |
| V1 (2)              | CACAAAGCCTAGTGTGCGTATTAATGAAATGTAGAGGAGCATGTCTCAAAGGACCATGTA   | 328 |
| V44 (1)             | GACAAAGCATTAAAGTGTGTAGCACAAACATTGCAAGGGAGCGTGTCTTAGGGGACCATGTA | 328 |
| V45 (1)             | CACAAAGCATATATTGCGTTGCGAATAATTGCAGGGGAGCATGTCTTAGGGGTCCATGTA   | 331 |
| V46 (1)             | TGCAAAGCATTATGTGTGTTATAAATAAATGTAGAGGAGCATGTCTCAAAGGCCCATGTA   | 328 |
| V47 (1)             | CAGCAAGCATTAAAGTGTGTATCACACCATTGCAAGGGAGCGTGTCTAAAGGGACCATGTA  | 328 |
| V48 (2)             | CAGCAAGCATTAAAGTGTGTATCACAAACATTGCAAGGGAGCGTGTCTAAAGGGACCATGTA | 328 |
| V49 (1)             | TGGAAAGCATTATGTGTGTTATAAAAAAATGTAGAACAGCATGTCTCAGAGGACCATGTA   | 328 |
|                     | . .****.* : ** .*: ..: .* ** *... ***.***** ...* .*****        |     |
| TP01_0056 (genomic) | CTGACGACTGCCAAAATTGCTTTGATAGAACTGTAAATCTGCATTGCTGGAATGCATTG    | 537 |
| XM_765583 (mRNA)    | CTGACGACTGCCAAAATTGCTTTGATAGAACTGTAAATCTGCATTGCTGGAATGCATTG    | 537 |
| V1 (2)              | CTGACGACTGCCAAAATTGCTTTGATAGAACTGTAAATCTGCATTGCTGGAATGCATTG    | 388 |
| V44 (1)             | CAGAAGACTGCCAAAATGCATTGAAAAAATTGTAAACAGGCATTGCTGGAATGTATTG     | 388 |
| V45 (1)             | CTAAAGAGTGTCAAGAATGCATTAAAAAATTGTAAACAGGCATTGCTGGAATGTATTG     | 391 |
| V46 (1)             | CCGACGGATGTCAAAAGTGTATTAATACTAATTGTAAACCGGCACTGCTGGAATGCATTG   | 388 |
| V47 (1)             | CAGAAGGCTGTCAAGAATGCATTAAAAGAAATTGTATGGAAGCATTGCTGCAATGCATTG   | 388 |
| V48 (2)             | CAGATGGCTGTCAAGAATGCATTAAAAGAAATTGTATGGAAGCATTGCTGGAATGCATTG   | 388 |
| V49 (1)             | CTGATGACTGCCAAAATTGCATTAAAAGAAATTGTAAAGCAAGGATTGCTGGAATGCATTG  | 388 |
|                     | * .* * . ** ***.* ** :**.*:* :** ***.:. . * * ***** *.** ****  |     |
| TP01_0056 (genomic) | GGAAAACAAGTATTCCAAATCCATGTAAATGGAAAGAAGATTATCTAAAATACAAATTTT   | 597 |
| XM_765583 (mRNA)    | GGAAAACAAGTATTCCAAATCCATGTAAATGGAAAGAAGATTATCTAAAATACAAATTTT   | 597 |

|                     |                                                                              |     |
|---------------------|------------------------------------------------------------------------------|-----|
| V1 (2)              | GGAAAACAAGTATTCCAAATCCATGTAAATGGAAAGAAGATTATCTAAAATACAAATTTTC                | 448 |
| V44 (1)             | GAAAAGGTGATGTTCCGAATCCTTGCGATTGGGAGAAAGAATATCTAAGTTACAACTTC                  | 448 |
| V45 (1)             | GAAAAGGTGATGTTCCGAATCCTTGTCAATGGAAAGATGATTATCTAAAATTCAACTTC                  | 451 |
| V46 (1)             | GAGTAAATGATATTCCAAATCCATGTAAATGGAAAGAAGATTATCTAAAATACAACTTC                  | 448 |
| V47 (1)             | GGAAACCAAGTGTTCCAAATCCTTGTGATTGGAAAGATGATTATCTAAAATTCAAATTTTC                | 448 |
| V48 (2)             | GGAAACCAAGTATTCCAAATCCTTGTGATTGGAAAGATGATTATCTAAAATTCAAATTTTC                | 448 |
| V49 (1)             | GAAAAGAGGATGTTCCAAATCCTTGCGATTGGGACAAAGAATATCTAAAATACAACTTC                  | 448 |
|                     | *...: *    ...: **... *****: **    *: ***. *    .*: ** *****. .*: ***** **   |     |
| TP01_0056 (genomic) | CTGAAACAGATGAGGACGAATCTACGAAAAAAGGA <b><i>GAAGCCTCCGGCACTTCATAG</i></b> GGAT | 657 |
| XM_765583 (mRNA)    | CTGAAACAGATGAGGACGAATCTACGAAAAAAGGAGAAGCCTCCGGCACTTCATAGGGAT                 | 657 |
| V1 (2)              | CTGAAACAGATGAGGACGAATCTACGAAAAA-----                                         | 480 |
| V44 (1)             | CTGAAACA-----                                                                | 456 |
| V45 (1)             | CTGAAACA-----                                                                | 459 |
| V46 (1)             | CTGAAACAGATGAGGAC-----                                                       | 465 |
| V47 (1)             | CTGAAACAGGTGAGGATGAGGCTCA-----                                               | 473 |
| V48 (2)             | CTGAAACAGATAGTGACGAATCTGAGAAAA-----                                          | 479 |
| V49 (1)             | CTGATACAGATGGGGATGAGTCTCA-----                                               | 473 |
|                     | **** **                                                                      |     |

Primer regions are in bold, underlined and italicized text.

**Table S4b: Tp2 protein variant Clustal alignment**

|           |                                                               |     |
|-----------|---------------------------------------------------------------|-----|
| XP_765583 | MKLAARLISLYFIIYILHSPVLGG-NCSHEELKKLGMLEGDGFDRDALFKSSHGMGKVGK  | 59  |
| V1 (2)    | -----ISLYFIIYILHSPVLGG-NCSHEELKKLGMLEGDGFDRDALFKSSHGMGKVGK    | 52  |
| V42 (1)   | -----ISLYFIIIFILPSSVLGNNNCSDSELETLGMLDKPDPDKQRLFLTSKAMSTVGK   | 53  |
| V43 (1)   | -----ISLYFVIFILPSSVLGG-NCTNEELKKLGMVVGEGLDMEALFKTSKGMTKVGR    | 52  |
| V44 (1)   | -----ISLYFIIIFILPSSVLGG-NCTEELKMKGMVEGEGFDKEKLFKSSKSMGIVGR    | 52  |
| V45 (1)   | -----ISLYFIIIFILPSSVLGG-NCSDELRLKLGMLKGDGFDRDALFKSSHGMGKVGK   | 52  |
| V46 (1)   | -----ISLYFIIIFILPSSVLGG-NCSDELDTLGLLDPDLKRNRLFLTSKGMGKIAR     | 52  |
| V47 (2)   | -----ISLYFIIIFILPSSVLGG-NCSDELDTLGLLDPDLKRNRLFLTSKGMGKIAR     | 52  |
|           | ***** *:** * *** **:..** .:~:~ . * : ** :~:. * ~:~            |     |
| XP_765583 | RYGLKTTPKVDKVLADLETFLFGKHGLGGISKDCLKCFAQSLVCVLMKCRGACLKGPCTDD | 119 |
| V1 (2)    | RYGLKTTPKVDKVLADLETFLFGKHGLGGISKDCLKCFAQSLVCVLMKCRGACLKGPCTDD | 112 |
| V42 (1)   | KYGIRPGTKTEKFLKELTLLTQLGITGIREQCLACFAQSIYCVANNCRGACLKGPCTKE   | 113 |
| V43 (1)   | KYGIRPGTTKDKLTKELTRLLEKIGIIGVSESLSCFGQSIKCVAQHCKGACLKGPCTED   | 112 |
| V44 (1)   | NHGLKPKPRLESVFEDLEKLFKGHGLGGISKNCLTCFVQSIMCVINKCRGACLKGPCTDG  | 112 |
| V45 (1)   | MHGLKTTPKVERVLEDETFLFGKIGLGGISKDCLKCFVESIMCVIKKCRACLRGPCTDD   | 112 |
| V46 (1)   | RFGIRPGTKTEKFLKELTKLFTTEIGITGVGEKCLECLAASIKCVSHHCKGACLKGPCTEG | 112 |
| V47 (2)   | RFGIRPGTKTEKFLKELTKLFTTEIGITGVGEKCLECLAASIKCVSQHCKGACLKGPCTDG | 112 |
|           | .*~:~ : . : * * : : * : * : .** * : * : ** :~:~ *** ~*~:~     |     |
| XP_765583 | CQNCFDRNCKSALLECIGKTSIPNPCKWKEDYLKYKFPETDEDESTKKGEASGTS       | 174 |
| V1 (2)    | CQNCFDRNCKSALLECIGKTSIPNPCKWKEDYLKYKFPETDEDESTKK-----         | 160 |
| V42 (1)   | CQECIKKNCKQALLECIGKGDVPNPCKQWKDDYLKFKLPET-----                | 153 |
| V43 (1)   | CQKCIKKNCKQALLECIGKGDVPNPCKDWEKEYLSYKLPET-----                | 152 |
| V44 (1)   | CQKCIKKNCKQALLECIGKGDVPNPCKWKEDYLKYKLPETDED-----              | 155 |
| V45 (1)   | CQNCIKRNCKQGLLECIGKEDVPNPCKDWDKEYLKYKLPDTDGDES-----           | 157 |
| V46 (1)   | CQECIKRNCKMEALLQCIKGPSVPNPCKDWDKDDYLKFKFPETGEDEA-----         | 157 |
| V47 (2)   | CQECIKRNCKMEALLECIGKPSIPNPCKDWDKDDYLKFKFPETDSESEK-----        | 159 |
|           | **~:~. ** .**~*~ .:~*~*~*~ :~*~*~*~*~                         |     |

Eptiope region highlighted in grey. Eptiope in close proximity or overlapping are denoted by underlined regions or highlighted in a different shade of grey.

Table S5a: Tp3 nucleotide variant Clustal alignment

|                     |                                                                       |     |
|---------------------|-----------------------------------------------------------------------|-----|
| TP01_0868 (genomic) | <u>ATGAAATTAAATACTATCGCAATAG</u> CCCTTTTTGTATTCTGTTTCTCACAGTTTTTAAAA  | 60  |
| XM_7663892 (mRNA)   | ATGAAATTAAATACTATCGCAATAGCCTTTTTGTATTCTGTTTCTCACAGTTTTTAAAA           | 60  |
| V1 (2)              | -----                                                                 | 60  |
| V2 (1)              | -----                                                                 | 0   |
| V3 (3)              | -----                                                                 | 0   |
| V4 (1)              | -----                                                                 | 0   |
| V5 (3)              | -----                                                                 | 0   |
| V6 (3)              | -----                                                                 | 0   |
| V7 (1)              | -----                                                                 | 0   |
| V8 (1)              | -----                                                                 | 0   |
| V9 (1)              | -----                                                                 | 0   |
| V10 (5)             | -----                                                                 | 0   |
| V11 (1)             | -----                                                                 | 0   |
| V12 (1)             | -----                                                                 | 0   |
| V13 (1) *           | -----                                                                 | 0   |
|                     |                                                                       |     |
| TP01_0868 (genomic) | AATGTGTCTGCTCTGAGGCGTAGTTCTCCAGATTTGTCACCAGATGGTTCTTTTCTTCAA          | 120 |
| XM_7663892 (mRNA)   | AATGTGTCTGCTCTGAGGCGTAGTTCTCCAGATTTGTCACCAGATGGTTCTTTTCTTCAA          | 120 |
| V1 (2)              | --TGTGTCTGCTCTGAGGCGTAGTTCTCCAGATTTGTCACCAGATGGTTCTTTTCTTCAA          | 120 |
| V2 (1)              | --TGTGTCTGCTCTGAGGCGTAGTTCTCCAGATTTATCACCAGATGGTTCTTTTCTTCAA          | 58  |
| V3 (3)              | --TGTGTCTGCTCTGAGGCGTAGTTCTCCAGATTTATCACCAGATGGTTCTTTTCTTCAA          | 58  |
| V4 (1)              | --TGTGTCTGCTCTGAGGCGTAGTTCTCCAGATTTATCACCAGATGGTTCTTTTCTTCAA          | 58  |
| V5 (4)              | --TGTGTCTGCTCTGAGGCGTAGTTCTCCAGATTTATCACCAGATGGTTCTTTTCTTCAA          | 58  |
| V6 (3)              | --TGTGTCTGCTCTGAGGCGTAGTTCTCCAGATTTATCACCAGATGGTTCTTTTCTTCAA          | 58  |
| V7 (1)              | --TGTGTCTGCTCTGAGGCGTAGTTCTCCAGATTTGTCACCAGATGGTTCTTTTCTTCAA          | 58  |
| V8 (1)              | --TGTGTCTGCTCTGAGGCGTAGTTCTCCAGATTTGTCACCAGATGGTTCTTTTCTTCAA          | 58  |
| V9 (1)              | --TGTGTCTGCTCTGAGGCGTAGTTCTCCAGATTTGTCACCAGATGGTTCTTTTCTTCAA          | 58  |
| V10 (5)             | --TGTGTCTGCTCTGAGGCGTAGTTCTCCAGATTTGTCACCAGATGGTTCTTTTCTTCAA          | 58  |
| V11 (1)             | --TGTGTCTGCTCTGAGGCGTAGTTCTCCAGATTTGTCACCAGATGGTTCTTTTCTTCAA          | 58  |
| V12 (1)             | --TGTGTCTGCTCTGAGGCGTAGTTCTCCAGATTTGTCACCAGATGGTTCTTTTCTTCAA          | 58  |
| V13 (1) *           | --TGTGTCTGCTCTGAGGCGTAGTTCTCCAGATTTGTCACCAGATGGTTCTTTTCTTCAA<br>***** | 58  |
|                     |                                                                       |     |
| TP01_0868 (genomic) | GTAAATCAGCTTCTCCTCAAGATAAAACAAGATGTAATCCAAAGTTCCTCTCCTAAGGTA          | 180 |
| XM_7663892 (mRNA)   | GTAAATCAGCTTCTCCTCAAGATAAAACAAGATGTAATCCAAAGTTCCTCTCCTAAGGTA          | 180 |
| V1 (2)              | GTAAATCAGCTTCTCCTCAAGATAAAACAAGATGTAATCCAAAGTTCCTCTCCTAAGGTA          | 180 |
| V2 (1)              | GTAAATCAGCTTCTCCTCAAGATAAAACAAGATGTAATCCAAAGTTCCTCTCCTAAGGTA          | 118 |

|                     |                                                                        |     |
|---------------------|------------------------------------------------------------------------|-----|
| V3 (3)              | GTAAAATCAGCTTCTCCTCAAGATAAAACAAGATGTAATCCAAAGTTCCTCTCCTAAGGTA          | 118 |
| V4 (1)              | GTAAAATCAGCTTCTCCTCAAGATAAAACAAGATGTAATCCAAAGTTCCTCTGCTAAGGTA          | 118 |
| V5 (4)              | GTAAAATCAGCTTCTCCTCAAGATAAAACAAGATGTAATCCAAAGTTCCTCTGCTAAGGTA          | 118 |
| V6 (3)              | GTAAAATCAGCTTCTCCTCAAGATAAAACAAGATGTAATCCAAAGTTCCTCTGCTAAGGTA          | 118 |
| V7 (1)              | GTAAAATCAGCTTCTCCTCAAGATAAAACAAGATGTAATCCAAAGTTCCTCTCCTAAGGTA          | 118 |
| V8 (1)              | GTAAAATCAGCTTCTCCTCAAGATAAAACAAGATGTAATCCAAAGTTCCTCTCCTAAGGTA          | 118 |
| V9 (1)              | GTAAAATCAGCTTCTCCTCAAGATAAAACAAGATGTAATCCAAAGTTCCTCTCCTAAGGTA          | 118 |
| V10 (5)             | GTAAAATCAGCTTCTCCTCAAGATAAAACAAGATGTAATCCAAAGTTCCTCTCCTAAGGTA          | 118 |
| V11 (1)             | GTAAAATCAGCTTCTCCTCAAGATAAAACAAGATGTAATCCAAAGTTCCTCTCCTAAGGTA          | 118 |
| V12 (1)             | GTAAAATCAGCTTCTCCTCAAGATAAAACAAGATGTAATCCAAAGTTCCTCTCCTAAGGTA          | 118 |
| V13 (1) *           | GTAAAATCAGCTTCTCCTCAAGATAAAACAAGATGTAATCCAAAGTTCCTCTCCTAAGGTA<br>***** | 118 |
| TP01_0868 (genomic) | ACAGTGCCTACGGTTGACCCTGAAGGCCTCAAGAAGGCGGTTACTGCAGCAGTTCTATCA           | 240 |
| XM_7663892 (mRNA)   | ACAGTGCCTACGGTTGACCCTGAAGGCCTCAAGAAGGCGGTTACTGCAGCAGTTCTATCA           | 240 |
| V1 (2)              | ACAGTGCCTACGGTTGACCCTGAAGGCCTCAAGAAGGCGGTTACTGCAGCAGTTCTATCA           | 240 |
| V2 (1)              | ACAGTGCCTGCGGTGGACCCTGAAGGCCTCAAGAAGGCGGTTACTGCAGCAGTTCTATCA           | 178 |
| V3 (3)              | ACAGTGCCTACGGTTGACCCTGAAGGCCTCAAGAAGGCGGTTACTGCAGCAGTTCTATCA           | 178 |
| V4 (1)              | ACAGTGCCTGCGGTGGACCCTGAAGGCCTCAAGAAGGCGGTTACTGCACCAGTTCTATCA           | 178 |
| V5 (4)              | ACAGTGCCTGCGGTGGACCCTGAAGGCCTCAAGAAGGCGGTTACTGCACCAGTTCTATCA           | 178 |
| V6 (3)              | ACAGTGCCTGCGGTGGACCCTGAAGGCCTCAAGAAGGCGGTTACTGCAGCAGTTCTATCA           | 178 |
| V7 (1)              | ACAGTGCCTGCGGTGGACCCTGAAGGCCTCAAGAAGGCGGTTACTGCAGCAGTTCTATCA           | 178 |
| V8 (1)              | ACAGTGCCTACGGTTGACCCTGAAGGCCTCAAGAAGGCGGTTACTGCAGCAGTTCTTTCA           | 178 |
| V9 (1)              | ACAGTGCCTACGGTTGACCCTGAAGGCCTCAAGAAGGCGGTTACTGCAGCAGTTCTATCA           | 178 |
| V10 (5)             | ACAGTGCCTACGGTTGACCCTGAAGGCCTCAAGAAGGCGGTTACTGCAGCAGTTCTATCA           | 178 |
| V11 (1)             | ACAGTGCCTACGGTTGACCCTGAAGGCCTCAAGAAGGCGGTTACTGCAGCAGTTCTATCA           | 178 |
| V12 (1)             | ACAGTGCCTACGGTTGACCCTGAAGGCCTCAAGAAGGCGGTTACTGCAGCAGTTCTATCA           | 178 |
| V13 (1) *           | ACAGTGCCTACGGTTGACCCTGAAGGCCTCAAGAAGGCGGTTACTGCAGCAGTTCTATCA<br>*****  | 178 |
| TP01_0868 (genomic) | AACCAAAATCAAGCTCTACAAAACGGTGCTCTTAATCCAGCAGATTTCACTCAAGCTGCC           | 300 |
| XM_7663892 (mRNA)   | AACCAAAATCAAGCTCTACAAAACGGTGCTCTTAATCCAGCAGATTTCACTCAAGCTGCC           | 300 |
| V1 (2)              | AACCAAAATCAAGCTCTACAAAACGGTGCTCTTAATCCAGCAGATTTCACTCAAGCTGCC           | 300 |
| V2 (1)              | AACCAAAATCAAGCTCTACAAAACGGTGCTCTTAATCCAGCAGATTTCACTCAAGCTGCG           | 238 |
| V3 (3)              | AACCAAAATCAAGCTCTACAAAACGGTGCTCTTAATCCAGCAGATTTCACTCAAGCTGCG           | 238 |
| V4 (1)              | AACCAAAATCAAGCTCTACAAAACGGTGCTCTTAATCCAGCAGATTTCACTCAAGCCGCC           | 238 |
| V5 (4)              | AACCAAAATCAAGCTCTACAAAACGGTGCTCTTAATCCAGCAGATTTCACTCAAGCCGCC           | 238 |
| V6 (3)              | AACCAAAATCAAGCTCTACAAAACGGTGCTCTTAATCCAGCAGATTTCACTCAAGCCGCC           | 238 |
| V7 (1)              | AACCAAAATCAAGCTCTACAAAACGGTGCTCTTAATCCAGCAGATTTCACTCAAGCTGCC           | 238 |
| V8 (1)              | AACCAAAATCAAGCTCTACAAAACGGTGCTCTTAATCCAGCAGATTTCACTCAAGCTGCC           | 238 |
| V9 (1)              | AACCAAAATCAAGCTCTACAAAACGGTGCTCTTAATCCAGCAGATTTCACTCAAGCTACC           | 238 |

|           |                                                                           |     |
|-----------|---------------------------------------------------------------------------|-----|
| V10 (5)   | AACCAAAATCAAGCTCTACAAAACGGTGCTCTTAATCCAGCAGATTTCACTCAAGCTGCC              | 238 |
| V11 (1)   | AACCAAAATCAAGCTCTACAAAACGGTGCTCTTAATCCAGCAGATTTCACTCAAGCTGCC              | 238 |
| V12 (1)   | AACCAAAATCAAGCTCTACAAAACGGTGCTCTTAATCCAGCAGATTTCACTCAAGCTGCC              | 238 |
| V13 (1) * | AACCAAAATCAAGCTCTACAAAACGGTGCTCTTAATCCAGCAGATTTCACTCAAGCTGCC<br>***** * * | 238 |

|                     |                                                                       |     |
|---------------------|-----------------------------------------------------------------------|-----|
| TP01_0868 (genomic) | TCTGTTAATTCCAT---GAGTAATGCTGTTAGTGCCATGAACAATACTGTTGGTCCAGTA          | 357 |
| XM_7663892 (mRNA)   | TCTGTTAATTCCAT---GAGTAATGCTGTTAGTGCCATGAACAATACTGTTGGTCCAGTA          | 357 |
| V1 (2)              | TCTGTTAATTCCAT---GAGTAATGCTGTTAGTGCCATGAACAATACTGTTGGTCCAGTA          | 357 |
| V2 (1)              | GCTGTTAATTCCAT---GAGTAATGCTGTTAGTGCCATGAACAATACTGTTGGTCCAGC-          | 294 |
| V3 (3)              | GCTGTTAATTCCAT---GAGTAATGCTGTTGGTGCCATGAACAACACTGTTGGTCCAGT-          | 294 |
| V4 (1)              | GCTGTTAATTCCAT---GAGTAATGCTGTTAGTGCCATGAACAATACTGTTGGTCCAGC-          | 294 |
| V5 (4)              | GCTGTTAATTCCAT---GAGTAATGCTGTTAGTGCCATGAACAATACTGTTGGTCCAGC-          | 294 |
| V6 (3)              | GCTGTTAATTCCAT---GAGTAATGCTGTTAGTGCCATGAACAATACTGTTGGTCCAGC-          | 294 |
| V7 (1)              | GCTGTTAATTCCAT---GAGTAATGCTGTTAGTGCCATGAACAATACTGTTGGTCCAGT-          | 294 |
| V8 (1)              | TCTGTTAATTCCAT---GAGTAATGCTGTTAGTGCCATGAACAATACTGTTGGTCCAGT-          | 294 |
| V9 (1)              | TCTGTTAATTCCAT---GAGTAATGCTGTTAGTGCCATGAACAATACTGTTGGTCCAGTA          | 295 |
| V10 (5)             | TCTGTTAATTCCAT---GAGTAATGCTGTTAGTGCCATGAACAATACTGTTGGTCCAGT-          | 294 |
| V11 (1)             | TCTGTTAATTCCAT---GAGTAATGCTGTTAGTGCCATGAACAATACTGTTGGTCCAGT-          | 294 |
| V12 (1)             | TCTGTTAATTCCAT---GAGTAATGCTGTTAGTGCCATGAACAATACTGTTGGTCCAGT-          | 294 |
| V13 (1) *           | TCTGTTAATTCCAT---GAGTAATGCTGTTAGTGCCATGAACAATACTGTTGGTCCAGT-<br>***** | 294 |

|                     |                                                                       |     |
|---------------------|-----------------------------------------------------------------------|-----|
| TP01_0868 (genomic) | AAAAATCCCATGGCTACTGTTGGTACTATGAACTCCTTTACTGGAATGCCTGGTGTACAG          | 417 |
| XM_7663892 (mRNA)   | AAAAATCCCATGGCTACTGTTGGTACTATGAACTCCTTTACTGGAATGCCTGGTGTACAG          | 417 |
| V1 (2)              | AAAAATCCCATGGCTACTGTTGGTACTATGAACTCCTTTACTGGAATGCCTGGTGTACAG          | 417 |
| V2 (1)              | --AAATCCCATGGCTACTGTTGGTACTATGAACTCCTTTACTGGAACGCCTGGTGTACAG          | 352 |
| V3 (3)              | --AAATCCCATGACTACTGTTGGTACTATGAACTCCTTTACTGGAACGCCTGGTGTACAG          | 352 |
| V4 (1)              | --AAATCCCATGGCTACTGTTGGTACTATGAACTCCTTTACTGGAACGCCTGGTGTACAG          | 352 |
| V5 (4)              | --AAATCCCATGGCTACTGTTGGTACTATGAACTCCTTTACTGGAACGCCTGGTGTACAG          | 352 |
| V6 (3)              | --AAATCCCATGGCTACTGTTGGTACTATGAACTCCTTTACTGGAACGCCTGGTGTACAG          | 352 |
| V7 (1)              | --AAATCCCATGGCTACTGTTGGTACTATGAACTCCTTTACTGGAACGCCTGGTGTACAG          | 352 |
| V8 (1)              | --AAATCCCATGGCTACTGTTGGTACTATGAACTCCTTTACTGGAATGCCTGGTGTACAG          | 352 |
| V9 (1)              | AAAAATCCCATGGCTACTGTTGGTACTATGAACTCCTTTACTGGAATGCCTGGTGTACAG          | 355 |
| V10 (5)             | --AAATCCCATGGCTACTGTTGGTACTATGAACTCCTTTACTGGAATGCCTGGTGTACAG          | 352 |
| V11 (1)             | --AAATCCCATGGCTACTGTTGGTACTATGAACTCCTTTACTGGAATGCCTGGTGTACAG          | 352 |
| V12 (1)             | --AAATCCCATGGCTACTGTTGGTACTATGAACTCCTTTACTGGAATGCCTGGTGTACAG          | 352 |
| V13 (1) *           | --AAATCCCATGGCTACTGTTGGTACTATGAACTCCTTTACTGGAATGCCTGGTGTACAG<br>***** | 352 |

|                     |                                                             |     |
|---------------------|-------------------------------------------------------------|-----|
| TP01_0868 (genomic) | GATAATTTTCTCAGACACCGCCTGTTAATGTTCAAGACACCTCTACCCAAGAGAACAGT | 477 |
|---------------------|-------------------------------------------------------------|-----|

|                     |                                                                |     |
|---------------------|----------------------------------------------------------------|-----|
| XM_7663892 (mRNA)   | GATAATTTTCCTCAGACACCGCCTGTTAATGTTCAAGACACCTCTACCCAAGAGAACAGT   | 477 |
| V1 (2)              | GATAATTTTCCTCAGACACCGCCTGTTAATGTTCAAGACACCTCTACCCAAGAGAACAGT   | 477 |
| V2 (1)              | GATACTTTTTTCTCAGACACCGCCTGTTAATGTTCAAGACACCTCTACCCAAGAGAACAGT  | 412 |
| V3 (3)              | GATAATTTTCCTCAGACACCGCCTGTTAATGTTCAAGACACCTCTACCCAAGAGAACAGT   | 412 |
| V4 (1)              | GATAATTTTCCTCAGACACCGCCTGTTAATGTTCAAGACACCTCTACTCAAGAGAACAGT   | 412 |
| V5 (4)              | GATACTTTTTTCTCAGACACCGCCTGTTAATGTTCAAGACACCTCTACCCAAGAGAACAGT  | 412 |
| V6 (3)              | GATACTTTTTTCTCAGACACCGCCTGTTAATGTTCAAGACACCTCTACCCAAGAGAACAGT  | 412 |
| V7 (1)              | GATACTTTTCCTCAGACACCGCCTGTTAATGTTCAAGACACCTCTACTCAAGAGAACAGT   | 412 |
| V8 (1)              | GATAATTTTCCTCAGACACCGCCTGTTAATGTTCAAGACACCTCTACCCAAGAGAACAGT   | 412 |
| V9 (1)              | GATAATTTTCCTCAGACACCGCCTGTTAATGTTCAAGACACCTCTACCCAAGAGAACAGT   | 415 |
| V10 (5)             | GATAATTTTCCTCAGACACCGCCTGTTAATGTTCAAGACACCTCTACTCAAGAGAACAGT   | 412 |
| V11 (1)             | GATAATTTTCCTCAGACACCGCCTGTTAATGTTCAAGACACCTCTACCCAAGAGAACAGT   | 412 |
| V12 (1)             | GATAATTTTCCTCAGACACCGCCTGTTAATGTTCAAGACACCTCTACCCAAGAGAACAGT   | 412 |
| V13 (1) *           | GATAATTTTCCTCAGACACCGCCTGTTAATGTTCAAGACACCTCTACTCAAGAGAACAGT   | 412 |
|                     | *****                                                          |     |
| TP01_0868 (genomic) | CTTGACAACCTAAATCTCCTCTTAGATCCCTCGTTAGTAAAGATATCTCAAGCTGATAGT   | 537 |
| XM_7663892 (mRNA)   | CTTGACAACCTAAATCTCCTCTTAGATCCCTCGTTAGTAAAGATATCTCAAGCTGATAGT   | 537 |
| V1 (2)              | CTTGACAACCTAAATCTCCTCTTAGATCCCTCGTTAGTAAAGATATCTCAAGCTGATAGT   | 537 |
| V2 (1)              | CTTGACAACCTAAATCTCCTCTTAGATCCTTCGTTAGCAAAGATATCTCAAGCTGATAGT   | 472 |
| V3 (3)              | CTTGACAACCTAAATCTCCTCTTAGATCCTTCGTTACTAAAGATATCTCAAGCTGATAGT   | 472 |
| V4 (1)              | CTTGACAACCTAAATCTCCTCTTAGATCCCTCGTTAGTAAAGATATCTCAAGCTGATAGT   | 472 |
| V5 (4)              | CTTGACAACCTAAATCTCCTCTTAGATCCTTCGTTACTAAAGATATCTCAAGCTGATAGT   | 472 |
| V6 (3)              | CTTGACAACCTAAATCTCCTCTTAGATCCTTCGTTACTAAAGATATCTCAAGCTGATAGT   | 472 |
| V7 (1)              | CTTGACAACCTAAATCTCCTCTTAGATCCCTCGTTAGTAAAGATATCTCAAGCTGATAGT   | 472 |
| V8 (1)              | CTTGACAACCTAAATCTCCTCTTAGATCCCTCGTTAGTAAAGATATCTCAAGCTGATAGT   | 472 |
| V9 (1)              | CTTGACAACCTAAATCTCCTCTTAGATCCCTCGTTAGTAAAGATATCTCAAGCTGATAGT   | 475 |
| V10 (5)             | CTTGACAACCTAAATCTCCTCTTAGATCCCTCGTTAGTAAAGATATCTCAAGCTGATAGT   | 472 |
| V11 (1)             | CTTGACAACCTAAATCTCCTCTTAGATCCTTCGTTAGTAAAGATATCTCAAGCTGATAGT   | 472 |
| V12 (1)             | CTTGACAACCTAAATCTCCTCTTAGATCCCTCGTTAGTAAAGATATCTCAAGCTGATAGT   | 472 |
| V13 (1) *           | CTTGACAACCTAAATCTCCTCTTAGATCCCTCGTTAGTAAAGATATCTCAAGCTGATAGT   | 472 |
|                     | *****                                                          |     |
| TP01_0868 (genomic) | CACATAAAAGAAAGCATGGTTAGTTTTCATTTTTATTAATTTGTTTCAGGAAAAAGCTGTAC | 597 |
| XM_7663892 (mRNA)   | CACATAAAAGAAAGCATG-----GAAAAAGCTGTAC                           | 568 |
| V1 (2)              | CACATAAAAGAAAGCATGGTTAGTTTTCATTTTTATTAATTTGTTTCAGGAAAAAGCTGTAC | 597 |
| V2 (1)              | CACATAAAAGAAAGCATGGTTAGTTTTATTTTTATTAATTTGTTTCAGGAAAAAGCTGTAC  | 532 |
| V3 (3)              | CACATAAAAGAAAGCATGGTTAGTTTTATTTTTATTAAGTTTTCAGGAAAAAGCTGTAC    | 532 |
| V4 (1)              | CACATAAAAGAAAGCATGGTTAGTTTTATTTTTACTAATTTTTTCAGGAAAAAGCTGTAC   | 532 |
| V5 (4)              | CACATAAAAGAAAGCATGGTTAGTTTTATTTCTTATTAATTTGCTCAGGAAAAAGCTGTAC  | 532 |
| V6 (3)              | CACATAAAAGAAAGCATGGTTAGTTTTATTTTTATTAATTTGTTTCAGGAAAAAGCTGTAC  | 532 |



V7 (1) CACATAAAAGAAAGCATGGTTAGTTTTATTTTTACTAATTTTTTCAGGAAAAAGCTGTAC 532  
V8 (1) CACATAAAAGAAAGCATGGTTAGTTTCATTTTTATTAATTTGTTTCAGGAAAAAGCTGTAC 532  
V9 (1) CACATAAAAGAAAGCATGGTTAGTTTCATTTTTATTAATTTGTTTCAGGAAAAAGCTGTAC 535  
V10 (5) CACATAAAAGAAAGCATGGTTAGTTTTATTTTTACTAATTTTTTCAGGAAAAAGCTGTAC 532  
V11 (1) CACATAAAAGAAAGCATGGTTAGTTTTATTTTTATTAGTTTGTTCAGGAAAAAGCTGTAC 532  
V12 (1) CACATAAAAGAAAGCATGGTTAGTTTTATTTTTATTAGTTTGTTCAGGAAAAAGCTGTAC 532  
V13 (1) \* CACATAAAAGAAAGCATGGTTAGTTTTATTTTTACTAATTTTTTCAGGAAAAAGCTGTAC 532  
\*\*\*\*\*

TP01\_0868 (genomic) ACAGCCTTAAAAAGGTCTTGGAGGGGCTAACCAACCTTGC GACTCTGTCTAAAAGTAGGG 657  
XM\_7663892 (mRNA) ACAGCCTTAAAAAGGTCTTGGAGGGGCTAACCAACCTTGC GACTCTGTCTAAAAGTAGGG 628  
V1 (2) ACAGCCTTAAAAAGGTCTTGGAGGGGCTAACCAACCTTGC GACTCTGTCTAAAAGTAGGG 657  
V2 (1) ACAGCCTTAAAAAGGTCTTGGAGGGGCTAACCAACCTTGC GACTCTGTCTAAAAGTAGGG 592  
V3 (3) ACAGCCTTAAAAAGGTCTTGGAGGGGCTAACCAACCTTGC GACTCTGTCTAAAAGTAGGG 592  
V4 (1) ACAGCCTTAAAAAGGTCTTGGAGGGGCTAACCAACCTTGC GACTCTGTCTAAAAGTAGGG 592  
V5 (4) ACAGCCTTAAAAAGGTCTTGGAGGGGCTAACCAACCTTGC GACTCTGTCTAAAAGTAGGG 592  
V6 (3) ACAGCCTTAAAAAGGTCTTGGAGGGGCTAACCAACCTTGC GACTCTGTCTAAAAGTAGGG 592  
V7 (1) ACAGCCTTAAAAAGGTCTTGGAGGGGCTAACCAACCTTGC GACTCTGTCTAAAAGTAGGG 592  
V8 (1) ACAGCCTTAAAAAGGTCTTGGAGGGGCTAACCAACCTTGC GACTCTGTCTAAAAGTAGGG 592  
V9 (1) ACAGCCTTAAAAAGGTCTTGGAGGGGCTAACCAACCTTGC GACTCTGTCTAAAAGTAGGG 595  
V10 (5) ACAGCCTTAAAAAGGTCTTGGAGGGGCTAACCAACCTTGC GACTCTGTCTAAAAGTAGGG 592  
V11 (1) ACAGCCTTAAAAAGGTCTTGGAGGGGCTAACCAACCTTGC GACTCTGTCTAAAAGTAGGG 592  
V12 (1) ACAGCCTTAAAAAGGTCTTGGAGGGGCTAACCAACCTTGC GACTCTGTCTAAAAGTAGGG 592  
V13 (1) \* ACAGCCTTAAAAAGGTCTTGGAGGGGCTAACCAACCTTGC GACTCTGTCTAAAAGTAGGG 592  
\*\*\*\*\*

TP01\_0868 (genomic) ATACTGAACCGTTTAAATGTTCTGGGGGATGACTATACGATGCGTAACGTTTTGGACCTCA 717  
XM\_7663892 (mRNA) ATACTGAACCGTTTAAATGTTCTGGGGGATGACTATACGATGCGTAACGTTTTGGACCTCA 688  
V1 (2) ATACTGAACCGTTTAAATGTTCTGGGGGATGACTATACGATGCGTAACGTTTTGGACCTCA 717  
V2 (1) ATACAGAACCGTTTAAATGTTCTGGGGGATGACTATACGATGCGTAACGTTTTGGACCTCA 652  
V3 (3) ATACTGAACCGTTTAAATGTTCTGGGGGATGACTATACGATGCGTAACGTTTTGGACCTCA 652  
V4 (1) ATACAGAACCGTTTAAATGTTCTGGGGGATGACTATACGATGCGTAACGTTTTGGACCTCA 652  
V5 (4) ATACTGAACCGTTTAAATGTTCTGGGGGATGACTATACGATGCGTAACGTTTTGGACCTCA 652  
V6 (3) ATACTGAACCGTTTAAATGTTCTGGGGGATGACTATACGATGCGTAACGTTTTGGACCTCA 652  
V7 (1) ATACTGAACCGTTTAAATGTTCTGGGGGATGACTATACGATGCGTAACGTTTTGGACCTCA 652  
V8 (1) ATACAGAACCGTTTAAATGTTCTGGGGGATGACTATACGATGCGTAACGTTTTGGACCTCA 652  
V9 (1) ATACTGAACCGTTTAAATGTTCTGGGGGATGACTATACGATGCGTAACGTTTTGGACCTCA 655  
V10 (5) ATACAGAACCGTTTAAATGTTCTGGGGGATGACTATACGATGCGTAACGTTTTGGACCTCA 652  
V11 (1) ATACTGAACCGTTTAAATGTTCTGGGGGATGACTATACGATGCGTAACGTTTTGGACCTCA 652  
V12 (1) ATACAGAACCGTTTAAATGTTCTGGGGGATGACTATACGATGCGTAACGTTTTGGACCTCA 652  
V13 (1) \* ATACTGAACCGTTTAAATGTTCTGGGGGATGACTATACGATGCGTAACGTTTTGGACCTCA 652

|                     |                                                                    |     |
|---------------------|--------------------------------------------------------------------|-----|
|                     | *****                                                              |     |
| TP01_0868 (genomic) | TGAATAAGGAACTCAGGCAGGTTGAATCTCTTCAGAAAGTTGTGTTCCAATTCAACGCCT       | 777 |
| XM_7663892 (mRNA)   | TGAATAAGGAACTCAGGCAGGTTGAATCTCTTCAGAAAGTTGTGTTCCAATTCAACGCCT       | 748 |
| V1 (2)              | TGAATAAGGAACTCAGGCAGGTTGAATCTCTTCAGAAAGTTGTGTTCCAATTCAACGCCT       | 777 |
| V2 (1)              | TGAATAAGGAACTCAGGCAGGTTGAATCTCTTCAGAAAGTTGTGTTCCAATTCAACGCCT       | 712 |
| V3 (3)              | TGAATAAGGAACTCAGGCAGGTTGAATCTCTTCAGAAAGTTGTGTTCCAATTCAACGCCT       | 712 |
| V4 (1)              | TGAATAAGGAACTCAGGCAGGTTGAATCTCTTCAGAAAGTTGTGTTCCAATTCAACGCCT       | 712 |
| V5 (4)              | TGAATAAGGAACTCAGGCAGGTTGAATCTCTTCAGAAAGTCTGTGTTCCAATTCAACGCCT      | 712 |
| V6 (3)              | TGAATAAGGAACTCAGGCAGGTTGAATCTCTTCAGAAAGTCTGTGTTCCAATTCAACGCCT      | 712 |
| V7 (1)              | TGAATAAGGAACTCAGGCAGGTTGAATCTCTTCA-----                            | 686 |
| V8 (1)              | TGAATAAGGAACTCAGGCAGGTTGAATCTCTTCAGAAAGTTGTGTTCCAATTCAACGCCT       | 712 |
| V9 (1)              | TGAATAAGGAACTCAGGCAGGTTGAATCTCTTCAGAAAGTTGTGTTCCAATTCAACGCCT       | 715 |
| V10 (5)             | TGAATAAGGAACTCAGGCAGGTTGAATCTCTTCAGAAAGTTGTGTTCCAATTCAACGCCT       | 712 |
| V11 (1)             | TGAATAAGGAACTCAGGCAGGTTGAATCTCTTCAGAAAGTTGTGTTCCAATTCAACGCCT       | 712 |
| V12 (1)             | TGAATAAGGAACTCAGGCAGGTTGAATCTCTTCAGAAAGTTGTGTTCCAATTCAACGCCT       | 712 |
| V13 (1) *           | TGAATAAGGAACTCAGGCAGGTTGAATCTCTTCAGAAAGTTGTGTTCCAATTCAACGCCT       | 712 |
|                     | *****                                                              |     |
| TP01_0868 (genomic) | TTGCACTTTCC <b><u>ACCTTCACTAAGAGTCCAGACGATAAT</u></b> AAAAAATCCTAA | 827 |
| XM_7663892 (mRNA)   | TTGCACTTTCCACCTTCACTAAGAGTCCAGACGATAATAAAAAATCCTAA                 | 798 |
| V1 (2)              | TTGCACTTTCC-----                                                   | 827 |
| V2 (1)              | TTGCACTTTCC-----                                                   | 723 |
| V3 (3)              | TTGCACTTTCC-----                                                   | 723 |
| V4 (1)              | TTGCACTTTCC-----                                                   | 723 |
| V5 (4)              | TTGCACTTTCC-----                                                   | 723 |
| V6 (3)              | TTGCACTTTCC-----                                                   | 723 |
| V7 (1)              | -----                                                              | 686 |
| V8 (1)              | TTGCACTTTCC-----                                                   | 723 |
| V9 (1)              | TTGCACTTTCC-----                                                   | 726 |
| V10 (5)             | TTGCACTTTCC-----                                                   | 723 |
| V11 (1)             | TTG-----                                                           | 715 |
| V12 (1)             | TTGCCCTTTCC-----                                                   | 723 |
| V13 (1) *           | TTGC-----                                                          | 716 |

Primer regions are in bold, underlined and italicized text.

\* Partial sequence as defined by only having either the forward or reverse sequence of the allele available for analysis. This sequence is its own variant due to unique nucleotides.

Table S5b: Tp3 protein variant Clustal alignment

|                |                                                                |              |              |                 |    |
|----------------|----------------------------------------------------------------|--------------|--------------|-----------------|----|
| XP_7663892 (2) | MKLNTIAIAFLYSCFSQFLKNV                                         | SALRRSSPDLS  | PDGSFLQVKSAS | PQDKQDVIQSSSPKV | 60 |
| V2 (1)         | -----                                                          | VSALRRSSPDLS | PDGSFLQVKSAS | PQDKQDVIQSSSAKV | 39 |
| V3 (3)         | -----                                                          | VSALRRSSPDLS | PDGSFLQVKSAS | PQDKQDVIQSSSAKV | 39 |
| V4 (3)         | -----                                                          | VSALRRSSPDLS | PDGSFLQVKSAS | PQDKQDVIQSSSAKV | 39 |
| V5 (1)         | -----                                                          | VSALRRSSPDLS | PDGSFLQVKSAS | PQDKQDVIQSSSPKV | 39 |
| V6 (1)         | -----                                                          | VSALRRSSPDLS | PDGSFLQVKSAS | PQDKQDVIQSSSPKV | 39 |
| V7 (1)         | -----                                                          | VSALRRSSPDLS | PDGSFLQVKSAS | PQDKQDVIQSSSPKV | 39 |
| V8 (3)         | -----                                                          | VSALRRSSPDLS | PDGSFLQVKSAS | PQDKQDVIQSSSPKV | 39 |
| V9 (9)         | -----                                                          | VSALRRSSPDLS | PDGSFLQVKSAS | PQDKQDVIQSSSPKV | 39 |
|                |                                                                | *****        | *****        | *****           | ** |
|                |                                                                |              |              |                 |    |
| XP_7663892 (2) | TVPTVDPEGLKKAVTAAVLSNQNQALQNGALNPADFTQAAASV-                   | NSMSNAV      | SAMNNTVGPV   | 119             |    |
| V2 (1)         | TVPAVDPEGLKKAVTAPVLSNQNQALQNGALNPADFTQAAAV-                    | NSMSNAV      | SAMNNTVGPV   | 98              |    |
| V3 (3)         | TVPAVDPEGLKKAVTAPVLSNQNQALQNGALNPADFTQAAAV-                    | NSMSNAV      | SAMNNTVGPV   | 98              |    |
| V4 (3)         | TVPAVDPEGLKKAVTAAVLSNQNQALQNGALNPADFTQAAAV-                    | NSMSNAV      | SAMNNTVGPV   | 98              |    |
| V5 (1)         | TVPAVDPEGLKKAVTAAVLSNQNQALQNGALNPADFTQAAAV-                    | NSMSNAV      | SAMNNTVGPV   | 98              |    |
| V6 (1)         | TVPAVDPEGLKKAVTAAVLSNQNQALQNGALNPADFTQAAAV-                    | NSMSNAV      | SAMNNTVGPV   | 98              |    |
| V7 (1)         | TVPTVDPEGLKKAVTAAVLSNQNQALQNGALNPADFTQATSV-                    | NSMSNAV      | SAMNNTVGPV   | 98              |    |
| V8 (3)         | TVPTVDPEGLKKAVTAAVLSNQNQALQNGALNPADFTQAAAV-                    | NSMSNAV      | GAMNNTVGPV   | 98              |    |
| V9 (9)         | TVPTVDPEGLKKAVTAAVLSNQNQALQNGALNPADFTQAAASV-                   | NSMSNAV      | SAMNNTVGPV   | 98              |    |
|                | ***:*****                                                      | *****        | :* *****     | *****           |    |
|                |                                                                |              |              |                 |    |
| XP_7663892 (2) | KNPMATVGTMNSFTGMPGVQDNFPQTTPPVNVQDTSTQENSLDNLNLLLDPSLVKISQADS  | 179          |              |                 |    |
| V2 (1)         | -NPMATVGTMNSFTGTPGVQDNFPQTTPPVNVQDTSTQENSLDNLNLLLDPSLVKISQADS  | 157          |              |                 |    |
| V3 (3)         | -NPMATVGTMNSFTGTPGVQDTFQSQTTPPVNVQDTSTQENSLDNLNLLLDPSLLKISQADS | 157          |              |                 |    |
| V4 (3)         | -NPMATVGTMNSFTGTPGVQDTFQSQTTPPVNVQDTSTQENSLDNLNLLLDPSLLKISQADS | 157          |              |                 |    |
| V5 (1)         | -NPMATVGTMNSFTGTPGVQDTFQSQTTPPVNVQDTSTQENSLDNLNLLLDPSLAKISQADS | 157          |              |                 |    |
| V6 (1)         | -NPMATVGTMNSFTGTPGVQDTFQSQTTPPVNVQDTSTQENSLDNLNLLLDPSLVKISQADS | 157          |              |                 |    |
| V7 (1)         | KNPMATVGTMNSFTGMPGVQDNFPQTTPPVNVQDTSTQENSLDNLNLLLDPSLVKISQADS  | 158          |              |                 |    |
| V8 (3)         | -NPMATVGTMNSFTGTPGVQDNFPQTTPPVNVQDTSTQENSLDNLNLLLDPSLLKISQADS  | 157          |              |                 |    |
| V9 (9)         | -NPMATVGTMNSFTGMPGVQDNFPQTTPPVNVQDTSTQENSLDNLNLLLDPSLVKISQADS  | 157          |              |                 |    |
|                | ***:*****                                                      | *****        |              |                 |    |
|                |                                                                |              |              |                 |    |
| XP_7663892 (2) | HIKESMEKAVHSLKKVLEGLTNLATLSKSRDTEPFNVLGDDYTMRNVLDLMNKELRQVES   | 239          |              |                 |    |
| V2 (1)         | HIKESMEKAVHSLKKVLEGLTNLATLSKSRDTEPFNVLGDDYTMRNVLDLMNKELRQVES   | 217          |              |                 |    |

|        |                                                              |     |
|--------|--------------------------------------------------------------|-----|
| V3 (3) | HIKESMEKAVHSLKKVLEGLTNLATLSKSRDTEPFNVLGDDYTMRNVLDLMNKELRQVES | 217 |
| V4 (3) | HIKESMEKAVHSLKKVLEGLTNLATLSKSRDTEPFNVLGDDYTMRNVLDLMNKELRQVES | 217 |
| V5 (1) | HIKESMEKAVHSLKKVLEGLTNLATLSKSRDTEPFNVLGDDYTMRNVLDLMNKELRQVES | 217 |
| V6 (1) | HIKESMEKAVHSLKKVLEGLTNLATLSKSRDTEPFNVLGDDYTMRNVLDLMNKELRQVES | 217 |
| V7 (1) | HIKESMEKAVHSLKKVLEGLTNLATLSKSRDTEPFNVLGDDYTMRNVLDLMNKELRQVES | 218 |
| V8 (3) | HIKESMEKAVHSLKKVLEGLTNLATLSKSRDTEPFNVLGDDYTMRNVLDLMNKELRQVES | 217 |
| V9 (9) | HIKESMEKAVHSLKKVLEGLTNLATLSKSRDTEPFNVLGDDYTMRNVLDLMNKELRQVES | 217 |
|        | *****                                                        |     |

|                |                             |     |
|----------------|-----------------------------|-----|
| XP_7663892 (2) | LQKVVVFQFNAFALSTFTKSPDDNKKS | 265 |
| V2 (1)         | LQKVVVFQFNAFALS-----        | 231 |
| V3 (3)         | LQKVVVFQFNAFALS-----        | 231 |
| V4 (3)         | LQKVVVFQFNAFALS-----        | 231 |
| V5 (1)         | LQKVVVFQFNAFALS-----        | 231 |
| V6 (1)         | L-----                      | 218 |
| V7 (1)         | LQKVVVFQFNAFALS-----        | 232 |
| V8 (3)         | LQKVVVFQFNAFALS-----        | 231 |
| V9 (9)         | LQKVVVFQFNAFALS-----        | 231 |

Eptiope sequence unknown.

Table S6a: Tp4 nucleotide variant Clustal alignment

|           |                                                               |                                    |      |
|-----------|---------------------------------------------------------------|------------------------------------|------|
| TP03_0210 | GTAGTTTTATCTAAATTGCCAATTGGTGATTTAGCAACA                       | CAATACTTTGCAGGTATTTAC              | 1377 |
| XM_758135 | GTAGTTTTATCTAAATTGCCAATTGGTGATTTAGCAACA                       | CAATACTTTGCAGATA-----              | 922  |
| V1 (2)    | -----                                                         | CAATACTTTGCAGGTATTTAC              | 21   |
| V2 (2)    | -----                                                         | CAATACTTTGCAGGTATTTAC              | 21   |
| V3 (4)    | -----                                                         | CAATACTTTGCAGGTATTTAC              | 21   |
| V4 (2)    | -----                                                         | CAATACTTTGCAGGTATTTAC              | 21   |
| V5 (2)    | -----                                                         | TACTTTGCAGGTATTTAC                 | 18   |
| V6 (1)    | -----                                                         | CAATACTTTGCAGGTATTTAC              | 21   |
| V7 (1)    | -----                                                         | CAATACTTTGCCGGTATTTAC              | 21   |
| V8 (1)    | -----                                                         | CAATACTTTGCAGGTATTTAC              | 21   |
| V9 (2)    | -----                                                         | CAATACTTTGCAGGTATTTAC              | 21   |
| V10 (1)   | -----                                                         | CAATACTTTGCAGGTATTTAC              | 21   |
| V11 (1)   | -----                                                         | CAATACTTTGCAGGTATTTAC              | 21   |
| V12 (2)   | -----                                                         | TTTGCAGGTATTTAC                    | 15   |
| V13 (3)   | -----                                                         | CAATACTTTGCAGGTATTTAC              | 21   |
|           |                                                               | ***** **                           |      |
| TP03_0210 | GCAGCTTGTACTCCCCACGGGAACCTAGTTATACAAATT                       | -TATTCTAGATTACTTATAT               | 1436 |
| XM_758135 | GCAGCTTGTACTCCCCACGGGAACCTAGTTATACAAATT                       | -----                              | 922  |
| V1 (2)    | GCAGCTTGTACTCCCCACGGGAACCTAGTTATACAAATT                       | -TATTCTAGATTACTTATAT               | 80   |
| V2 (2)    | GCAGCTTGTACTCCCCACGGGAACCTAGTTATACAAATT                       | -TATTCTAGATTACTTATAT               | 80   |
| V3 (4)    | GGAGCTTGTACTCCCCACGGGAACCTAGTTACACAAATTTAACACTAGATTAGTTATAT   |                                    | 81   |
| V4 (2)    | GGAGCTTGTACTCCCCACGGGAACCTAGTTACACACTTTAACACCAGATTAGTTATAT    |                                    | 81   |
| V5 (2)    | GCAGCTTGTACTCCCCACGGGAACCTAGTTACACAAATTTAACACTATATTAGTTATAT   |                                    | 78   |
| V6 (1)    | GGAGCTTGTACTCCCCACGGGAACCTAGTTATACACTTTAACACCAGATTAGTTATAT    |                                    | 81   |
| V7 (1)    | GCAGCTTGTACTCCCCACGGGAACCTAGTTATACACTTTAACACCAGATTAGTTATAT    |                                    | 81   |
| V8 (1)    | GGAGCTTGTACTCCCCACGGGAACCTAGTTACACAAATTTAACACTAGATTAGTTATAT   |                                    | 81   |
| V9 (2)    | GGAGCTTGTACTCCCCACGGGAACCTAGTTATACACTTTAACACCAGATTAGTTATAT    |                                    | 81   |
| V10 (1)   | GGAGCTTGTACTCCCCACGGGAACCTAGTTATACACTTTAACACCAGATTAGTTATAT    |                                    | 81   |
| V11 (1)   | GCAGCTTGTACTCCCCACGGGAACCTAGTTATATACTTTAACACTATATTAGTTATAT    |                                    | 81   |
| V12 (2)   | GGAGCTTGTACTCCCCACGGGAACCTAGTTATACAAATT                       | -TATTCTAGATTACTTATAT               | 74   |
| V13 (3)   | GGAGCTTGTACTCCCCACGGGAACCTAGTTACACAAATTTAACACTAGATTAGTTATAT   |                                    | 81   |
| TP03_0210 | CCCGTACAATATTAATAATTTTCCTTAGATAAAAAATGTATTTTGTGCCGGCCGGGTTGAT |                                    | 1496 |
| XM_758135 | CCCGTACAATATTAATAATTTTCCTTAGATAAAAAATGTATTTTGTGCCGGCCGGGTTGAT | -----AAAATGTATTTTGTGCCGGCCGGGTTGAT | 951  |
| V1 (2)    | CCCGTACAATATTAATAATTTTCCTTAGATAAAAAATGTATTTTGTGCCGGCCGGGTTGAT |                                    | 140  |
| V2 (2)    | CCCGTACAATATTAATAATTTTCCTTAGATAAAAAATGTATTTTGTGCCGGCCGGGTTGAT |                                    | 140  |
| V3 (4)    | ACTATACAATATTAATAATTTTCCTTAGATAAAGAATGTATTTTGTGCCGGTCGCGTTGAT |                                    | 141  |
| V4 (2)    | TGCATACAATATTAACAATTTTCCTTAGATAAAGAATGTATTTTGTGCCGGTCGCGTTGAT |                                    | 141  |
| V5 (2)    | TGCATACAATATTAACAATTTTCCTTAGATAAAGAATGTATTTTGTGCCGGTCGCGTTGAT |                                    | 138  |
| V6 (1)    | ACTATACAATATTAACAATTTTATAGATAAAGAATGTATTTTGTGCCGGTCGCGTTGAT   |                                    | 141  |
| V7 (1)    | TGCATACAATATTAACAATTTTATAGATAAAGAATGTATTTTGTGCCGGTCGCGTTGAT   |                                    | 141  |
| V8 (1)    | ACTATACAATATTAATAATTTTCCTTAGATAAAGAATGTATTTTGTGCCGGCCGGGTTGAT |                                    | 141  |
| V9 (2)    | ACTATACAATATTAACAATTTTATAGATAAAGAATGTATTTTGTGCCGGTCGCGTTGAT   |                                    | 141  |
| V10 (1)   | ACTATACAATATTAACAATTTTATAGATAAAGAATGTATTTTGTGCCGGTCGCGTTGAT   |                                    | 141  |
| V11 (1)   | TGCATACAATATTAACAATTTTCCTTAGATAAAGAATGTATTTTGTGCCGGTCGCGTTGAT |                                    | 141  |
| V12 (2)   | GCCATACAATATTAATAATTTTCCTTAGATAAAGAATGTATTTTGTGCCGGTCGCGTTGAT |                                    | 134  |
| V13 (3)   | ACTATACAATATTAATAATTTTCCTTAGATAAAGAATGTATTTTGTGCCGGCCGGGTTGAT |                                    | 141  |
|           |                                                               | * ***** ** *****                   |      |
| TP03_0210 | GAAATGATCTTATAAGAACGAGTAAAGCTACTGGTGCTTCTATTCAAACCACTCTCAAT   |                                    | 1556 |
| XM_758135 | GAAATGATCTTATAAGAACGAGTAAAGCTACTGGTGCTTCTATTCAAACCACTCTCAAT   |                                    | 1011 |
| V1 (2)    | GAAATGATCTTATAAGAACGAGTAAAGCTACTGGTGCTTCTATTCAAACCACTCTCAAT   |                                    | 200  |
| V2 (2)    | GAAATGATCTTATAAGAACGAGTAAAGCTACTGGTGCTTCTATTCAAACCACTCTCAAT   |                                    | 200  |
| V3 (4)    | GAAATGATCTTATAAGAACGAGTAAAGCTACTGGTGCTTCTATTCAAACCACTCTCAAT   |                                    | 201  |
| V4 (2)    | GAAATGATCTTATAAGAACGAGTAAAGCCACTGGTGCTTCTATTCAAACCACTCTCAAC   |                                    | 201  |
| V5 (2)    | GAAATGATCTTATAAGAACGAGTAAAGCTACTGGTGCTTCCATTCAAACCACTCTCAAT   |                                    | 198  |
| V6 (1)    | GAAATGATCTTATAAGAACGAGTAAAGCTACTGGTGCTTCCATTCAAACCACTCTCAAT   |                                    | 201  |
| V7 (1)    | GAAATGATCTTATAAGAACGAGTAAAGCTACTGGTGCTTCTATTCAAACCACTCTCAAT   |                                    | 201  |

V8 (1) GAAAATGATCTTATAAGAACGAGTAAAGCTACTGGTGCTTCTATTCAAACCACTCTCAAT 201  
V9 (2) GAAAATGATCTTATAAGAACGAGTAAAGCTACTGGTGCTTCCATTCAAACCACTCTCAAT 201  
V10 (1) GAAAATGATCTTATAAGAACGAGTAAAGCTACTGGTGCTTCCATTCAAACCACTCTCAAT 201  
V11 (1) GAAAATGATCTTATAAGAACGAGTAAAGCTACTGGTGCTTCYATTCAAACCACTCTCAAT 201  
V12 (2) GAAAATGATCTTATAAGAACGAGTAAAGCTACTGGTGCTTCTATTCAAACCACTCTCAAT 194  
V13 (3) GAAAATGATCTTATAAGAACGAGTAAAGCTACTGGTGCTTCTATTCAAACCACTCTCAAT 201  
\*\*\*\*\*

TP03\_0210 AACCTTTCAGTTGACGCTTAGGTACTGCGTTGCTTGCAGTCAATTCCTGCTACAATCTA 1616  
XM\_758135 AACCTTTCAGTTGACGT----- 1028  
V1 (2) AACCTTTCAGTTGACGCTTAGGTACTGCGTTGCTTGCAGTCAATTCCTGCTACAATCTA 260  
V2 (2) AACCTTTCAGTTGACGCTTAGGTACTGCGTTGCTTGCAGGCAATTCCTGCTACAATCTA 260  
V3 (4) AACCTTTCAGTTGACGCTTAGGTACTGCGTTGCTTGCAGTCAATTCCTGCTACAATCTA 261  
V4 (2) AACCTTTCAGTTGACGCTTAGGTACTGCGTTGCTTGCAGGCAATTCCTGCTACAATCTA 261  
V5 (2) AATCTTTCAGTTGACGCTTAGGTACTGCGTTTCTTGCAGGCAATTCCTGCTACAATCTA 258  
V6 (1) AACCTTTCAGTTGACGCTTAGGTACTGCGTTGCTTGCAGGCAATTCCTGCTACAATCTA 261  
V7 (1) AACCTTTCAGTTGACGCTTAGGTACTGCGTTGCTTGCAGGCAATTCCTGCTACAATCTA 261  
V8 (1) AACCTTTCAGTTGACGCTTAGGTACTGCGTTGCTTGCAGTCAATTCCTGCTACAATCTA 261  
V9 (2) AACCTTTCAGTTGACGCTTAGGTACTGCGTTGCTTGCAGGCAATTCCTGCTACAATCTA 261  
V10 (1) AACCTTTCAGTTGACGCTTAGGTACTGCGTTGCTTGCAGGCAATTCCTGCTACAATCTA 261  
V11 (1) AACCTTTCAGTTGACGCTTAGGTACTGCGTTGCTTGCAGGCAATTCCTGCTACAATATA 261  
V12 (2) AACCTTTCAGTTGACGCTTAGGTACTGCGTTGCTTGCAGGCAATTCCTGCTACAATCTA 254  
V13 (3) AACCTTTCAGTTGACGCTTAGGTACTGCGTTGCTTGCAGGCAATTCCTGCTACAATCTA 261  
\*\*

TP03\_0210 CTCAGCCTACTAGTTATTTATACTTTAGTGTTCACTTATTTATCCCATCCTGGA-TTCTA 1675  
XM\_758135 ----- 1028  
V1 (2) CTCAGCCTACTAGTTATTTATACTTTAGTGTTCACTTATTTATCCCATCCTGGA-TTCTA 319  
V2 (2) CTCAGCCTACTAGTTATTTATACTTTAGTGTTCACTTACTTATCCCATCCTGGA-TTCTA 319  
V3 (4) CTCAGTTTACTAGTTATTTATCACCCTACTTTGCAGTTATTTATCCCATCCTGGA-TTCTA 320  
V4 (2) CTCAGTTTACTAGTTATTTATCACCCTACTTTGCAGTTATTTATCCCATCCTGGGTTTGTA 321  
V5 (2) CTCAGCCTACTAGTTATTTATACTTTAGTGTTCACTTATTTATCCCATCCTGGA-TTCTA 317  
V6 (1) CTCAGCCTACTAGTTATTTATACTTTAGTGTTCACTTATTTATCCCATCCTGGA-TTCTA 320  
V7 (1) CTCAGTTTACTAGTTATTTATACTTTAGTGTTCACTTATTTATCCCATCCTGGA-TTCTA 320  
V8 (1) CTCAGCCTACTAGTTATTTATACTTTAGTGTTCACTTATTTATCCCATCCTGGA-TTCTA 320  
V9 (2) CTCAGCCTACTAGTTATTTATACTTTAGTGTTCACTTATTTATCCCATCCTGGA-TTCTA 320  
V10 (1) CTCAGCCTACTAGTTATTTATACTTTAGTGTTCACTTATTTATCCCATCCTGGA-TTCTA 320  
V11 (1) CTCAGTTTAAATAGTTATTTATCACCCTACTGTGCAGTTATTTATCCCATCCTGGA-TTCTA 320  
V12 (2) CTCAGTTTAAATAGTTATTTATCACCCTACTGTGCAGTTATTTATCCCATCCTGGGTTTGTA 314  
V13 (3) CTCAGTTTAAATAGTTATTTATCACCCTACTGTGCAGTTATTTATCCCATCCTGGA-TTCTA 320

TP03\_0210 TTCATCATTTACACTAGATTTACATGTTTTATTTATTGTATTCACCTTTTTAAATATAAT 1735  
XM\_758135 ----- 1028  
V1 (2) TTCATCATTTACACTAGATTTACATGTTTTATTTATTGTATTCACCTTTTTAAATATAAT 379  
V2 (2) TTCATCATTTACACTAGATTTACATGTTTTATTTATTGTATTCACCTTTTTAAATATAAT 379  
V3 (4) TTCATCATTTACACCAGATTTACATGCTTTTATTATTGTATTCACCTTTTTAAATATAAT 380  
V4 (2) TTCATCATTTACACTAGATTTACATGCTTATGAGTTATTCACCTTTTTAAATATAAT 381  
V5 (2) TTCATCATTTAAACTAGATTTACATGGTTTCTTTATTGTATTCACCTTT-TAAATACAAT 376  
V6 (1) TTCATCATTTACACTAGATTTACATGTTTTATTTATTGTATTCACCTTTTTAAATATAAT 380  
V7 (1) TTCATCATTTACACCAGATTTACATTTCTTTATTATTGTATTCACCTTTTTAAATATAAT 380  
V8 (1) TTCATCATTTACACTAGATTTACATGTTTTATTTATTGTATTCACCTTTTTAAATATAAT 380  
V9 (2) TTCATCATTTACACTAGATTTACATGTTTTATTTATTGTATTCACCTTTTTAAATATAAT 380  
V10 (1) TTCATCATTTACACTAGATTTACATGTTTTATTTATTGTATTCACCTTTTTAAATATAAT 380  
V11 (1) TTCATCATTTACACTAGATTTACATGGTTTCTTTGTTGTATTCACCTTTTTAAATATAAT 380  
V12 (2) TTCATCATTTAAACTAGATTTACATTTCTTTATTATTGTATTCACCTTTTTAAATATAAT 374  
V13 (3) TTCATCATTTACACCAGATTTACATGGTTTCTTTATTGTATTCACCTTTTTAAATATAAT 380

TP03\_0210 TTTATAATGGTTTATTAGGAACTTGTGGTGTGTTGAGGAAGTGCAAATTTGGGTCTGAAC 1795  
XM\_758135 -----CTTAGGAACTTGTGGTGTGTTGAGGAAGTGCAAATTTGGGTCTGAAC 1075  
V1 (2) TTTATAATGGTTTATTAGGAACTTGTGGTGTGTTGAGGAAGTGCAAATTTGGGTCTGAAC 439  
V2 (2) TTTATAATGGTTTATTAGGAACTTGTGGTGTGTTGAGGAAGTGCAAATTTGGGTCTGAAC 439

V3 (4) TTTATAATGGTTTATTAGGAACTTGTGGTGTGTTTGAGGAAGTGCAAATTGGGTCTGAAC 440  
 V4 (2) TTTATAATGGTTTATTAGGAACTTGTGGAGTGTGTTGAGGAGGTCCAAATTGGCTCTGAAC 441  
 V5 (2) TTTATAATGGTTTATTAGGAACTTGTGGAGTGTGTTGAGGAGGTCCAAATTGGCTCTGAAC 436  
 V6 (1) TTTATAATGGTTTATTAGGAACTTGTGGAGTGTGTTGAGGAAGTGCAAATTGGGTCTGAAC 440  
 V7 (1) TTTATAATGGTTTATTAGGAACTTGTGGAGTGTGTTGAGGAAGTCCAAATTGGGTCTGAAC 440  
 V8 (1) TTTATAATGGTTTATTAGGAACTTGTGGTGTGTTTGAGGAAGTGCAAATTGGGTCTGAAC 440  
 V9 (2) TTTATAATGGTTTATTAGGAACTTGTGGTGTGTTTGAGGAAGTGCAAATTGGGTCTGAAC 440  
 V10 (1) TTTATAATGGTTTATTAGGAACTTGTGGAGTGTGTTGAGGAAGTGCAAATTGGGTCTGAAC 440  
 V11 (1) TTTATAATGGTTTATTAGGAACTTGTGGAGTGTGTTGAGGAAGTCCAAATTGGMTCTGAAC 440  
 V12 (2) TTTATAATGGTTTATTAGGAACTTGTGGAGTGTGTTGAGGAGGTCCAAATTGGGTCTGAAC 434  
 V13 (3) TTTATACTGGTTTATTAGGAACTTGTGGAGTGTGTTGAGGAGGTCCAAATTGGCTCTGAAC 440  
 \*\*\*\*\*

TP03\_0210 GTTACAATATGTTTCACAGATTGCAAGAGTGCAAAAACCTGTACAATTGTGTTGAGAGGTG 1855  
 XM\_758135 GTTACAATATGTTTCACAGATTGCAAGAGTGCAAAAACCTGTACAATTGTGTTGAGAGGTG 1135  
 V1 (2) GTTACAATATGTTTCACAGATTGCAAGAGTGCAAAAACCTGTACAATTGTGTTGAGAGGTG 499  
 V2 (2) GTTACAATATGTTTCACAGATTGCAAGAGTGCAAAAACCTGTACAATTGTGTTGAGAGGTG 499  
 V3 (4) GTTACAATATGTTTCACAGATTGCAAGAGTGCAAAAACCTGTACAATTGTGTTGAGAGGTG 500  
 V4 (2) GTTACAATATGTTTCACAGATTGCAAGAGTGCAAAAACCTGTACAATTGTGTTGAGAGGTG 501  
 V5 (2) GTTACAATATGTTTCACAGATTGCAAGAGTGCAAAAACCTGTACAATTGTGTTGAGAGGTG 496  
 V6 (1) GTTACAATATGTTTCACAGATTGCAAGAGTGCAAAAACCTGTACAATTGTGTTGAGAGGTG 500  
 V7 (1) GTTACAATTTGTTTCACAGATTGCAAGAGTGCAAAAACCTGTACAATTGTGTTGAGAGGTG 500  
 V8 (1) GTTACAATATGTTTCACAGATTGCAAGAGTGCAAAAACCTGTACAATTGTGTTGAGAGGTG 500  
 V9 (2) GTTACAATATGTTTCACAGATTGCAAGAGTGCAAAAACCTGTACAATTGTGTTGAGAGGTG 500  
 V10 (1) GTTACAATATGTTTCACAGATTGCAAGAGTGCAAAAACCTGTACAATTGTGTTGAGAGGTG 500  
 V11 (1) GTTACAATATGTTTCACAGATTGCAAGAGTGCAAAAACCTGTACAATTGTGTTGAGAGGTG 500  
 V12 (2) GTTACAATTTGTTTCACAGATTGCAAGAGTGCAAAAACCTGTACAATTGTGTTGAGAGGTG 494  
 V13 (3) GTTACAATTTGTTTCACAGATTGCAAGAGTGCAAAAACCTGTACAATTGTGTTGAGAGGTG 500  
 \*\*\*\*\*

TP03\_0210 GAGGTCAGCAGTTCATTGATGAATCTGAACGTTCACTCCATGACGCGATTATGATTGTCA 1915  
 XM\_758135 GAGGTCAGCAGTTCATTGATGAATCTGAACGTTCACTCCATGACGCGATTATGATTGTCA 1195  
 V1 (2) GAGGTCAGCAGTTCATTGATGAATCTGAACGTTCACTCCATGACGCGATTATGATTGTCA 559  
 V2 (2) GAGGTCAGCAGTTCATTGATGAATCTGAACGTTCACTCCATGACGCGATTATGATTGTCA 559  
 V3 (4) GAGGTCAGCAGTTCATTGATGAATCTGAACGTTCACTCCATGACGCGATTATGATTGTCA 560  
 V4 (2) GAGGTCAGCAGTTCATTGATGAATCTGAACGTTCACTCCATGACGCGATTATGATTGTCA 561  
 V5 (2) GAGGTCAGCAGTTCATTGATGAATCTGAACGTTCACTCCATGACGCAATTATGATTGTCA 556  
 V6 (1) GGGGTCAGCAGTTCATTGATGAATCTGAACGTTCACTCCATGACGCAATTATGATTGTCA 560  
 V7 (1) GAGGTCAGCAGTTCATTGATGAATCTGAACGTTCACTCCATGACGCAATTATGATTGTCA 560  
 V8 (1) GAGGTCAGCAGTTCATTGATGAATCTGAACGTTCACTCCATGACGCGATTATGATTGTCA 560  
 V9 (2) GGGGTCAGCAGTTCATTGATGAATCTGAACGTTCACTCCATGACGCGATTATGATTGTCA 560  
 V10 (1) GGGGTCAGCAGTTCATTGATGAATCTGAACGTTCACTCCATGACGCAATTATGATTGTCA 560  
 V11 (1) GGGGTCAGCAGTTCATTGATGAATCTGAACGTTCACTCCATGACGCGATTATGATTGTCA 560  
 V12 (2) GGGGTCAGCAGTTCATTGATGAATCTGAACGTTCACTCCATGACGCAATTATGATTGTCA 554  
 V13 (3) GAGGTCAGCAGTTCATTGATGAATCTGAACGTTCACTCCATGACGCGATTATGATTGTCA 560  
 \* \*\*\*\*\*

TP03\_0210 GAAGAGCAACTAAATGTAATACTATCCTTCCCGGAGCTGGTGCCATTGAGATGTTGCTCT 1975  
 XM\_758135 GAAGAGCAACTAAATGTAATACTATCCTTCCCGGAGCTGGTGCCATTGAGATGTTGCTCT 1255  
 V1 (2) GAAGAGCAACTAAATGTAATACTATCCTTCCCGGAGCTGGTGCCATTGAGATGTTGCTCT 619  
 V2 (2) GAAGAGCAACTAAATGTAATACTATCCTTCCCGGAGCTGGCGCTATTGAGATGTTGCTCT 619  
 V3 (4) GAAGAGCAACTAAATGTAATACTATCCTTCCCGGCGCCGCCATTGAAATGTTACTCT 620  
 V4 (2) GAAGAGCAACTAAATGTAATACTATCCTTCCCGGAGCTGGTGCCATTGAGATGTTACTCT 621  
 V5 (2) GAAGAGCAACTAAATGTAATACTATCCTTCCCGGAGCTGGCGCCATTGAGATGTTGCTCT 616  
 V6 (1) GAAGAGCAACTAAGTGAATACTATCCTTCCCGGCGCCGCCATTGAGATGTTACTCT 620  
 V7 (1) GAAGAGCAACTAAATGTAATACTATCCTTCCCGGAGCTGGCGCCATTGAGATGTTACTCT 620  
 V8 (1) GAAGAGCAACTAAGTGAATACTATCCTTCCCGGCGCCGCCATTGAGATGTTGCTCT 620  
 V9 (2) GAAGAGCAACTAAATGTAATACTATCCTTCCCGGAGCTGGCGCCATTGAGATGTTGCTCT 620  
 V10 (1) GAAGAGCAACTAAGTGAATACTATCCTTCCCGGCGCCGCCATTGAGATGTTACTCT 620  
 V11 (1) GAAGAGCAACTAAATGTAATACTATCCTTCCCGGAGCTGGTGCCATTGAGATGTTACTCT 620  
 V12 (2) GAAGAGCAACTAAATGTAATACTATCCTTCCCGGAGCTGGTGCCATTGAGATGTTGCTCT 614  
 V13 (3) GAAGAGCAACTAAATGTAATACTATCCTTCCCGGCGCCGCCATTGAGATGTTGCTCT 620  
 \*\*\*\*\*

|           |                                                                                    |      |
|-----------|------------------------------------------------------------------------------------|------|
| TP03_0210 | CAACTTATCTCCTCCACTATTCTCTCAACACTATTAATCCCACAGACTCTGTCAACCATG                       | 2035 |
| XM_758135 | CAACTTATCTCCTCCACTATTCTCTCAACACTATTAATCCCACAGACTCTGTCAACCATG                       | 1315 |
| V1 (2)    | CAACTTATCTCCTCCACTATTCTCTCAACACTATTAATCCCACAGACTCTGTCAACCATG                       | 679  |
| V2 (2)    | CAACTTATCTCCTCCACTATTCTCTCAACACTATTAATCCCACAGACTCAGTTAACCATG                       | 679  |
| V3 (4)    | CAACTTATCTCCTTACACTACTCTCTCAACACTATTAATCCCACAGACTCAGTTAACCATG                      | 680  |
| V4 (2)    | CAACTTATCTCCTCCACTATTCTCTCAACACTATTAATCCCACAGACTCAGTTAACCATG                       | 681  |
| V5 (2)    | CAACTTATCTCCTCCACTATTCTCTCAACACTATCAATCCCACAGACTCAGTTAACCATG                       | 676  |
| V6 (1)    | CAACTTATCTCCTTACACTATTCTCTCAACACTATTAATCCCACAGACTCAGTTAACCATG                      | 680  |
| V7 (1)    | CAACTTATCTCCTTACACTATTCTCTCAACACTATTAATCCCACAGACTCAGTTAACCATG                      | 680  |
| V8 (1)    | CAACTTATCTCCTTACACTATTCTCTCAACACTATTAATCCCACAGACTCAGTTAACCATG                      | 680  |
| V9 (2)    | CAACTTATCTCCTCCACTATTCTCTCAACACTATTAATCCCACAGACTCAGTTAACCATG                       | 680  |
| V10 (1)   | CAACTTATCTCCTTACACTATTCTCTCAACACTATTAATCCCACAGACTCAGTTAACCATG                      | 680  |
| V11 (1)   | CAACTTATCTCCTCCACTATTCTCTCAACACTATTAATCCCACAGACTCAGTTAACCATG                       | 680  |
| V12 (2)   | CAACTTATCTCCTTACACTACTCTCTCAACACTATTAATCCCACAGACTCAGTTAACCATG                      | 674  |
| V13 (3)   | CAACTTATCTCCTCCACTATTCTCTCAACACTATTAATCCCACAGACTCAGTTAACCATG                       | 680  |
|           | ***** **                                                                           |      |
| TP03_0210 | TAACTGCGTTAA <b><u><i>CTCCGTAAATCATGTTAATGGAGT</i></u></b> TACTGGGGTGAATAAGAGTCTGG | 2095 |
| XM_758135 | TAACTGCGTTAACTCCGTAAATCATGTTAATGGAGTACTGGGGTGAATAAGAGTCTGG                         | 1375 |
| V1 (2)    | TAACTGCGTTAA-----                                                                  | 692  |
| V2 (2)    | TAACTGCGTTAA-----                                                                  | 692  |
| V3 (4)    | TAACTGCGTTAA-----                                                                  | 693  |
| V4 (2)    | TAACTGCGTTAA-----                                                                  | 694  |
| V5 (2)    | TAACTGCGTTAA-----                                                                  | 689  |
| V6 (1)    | TAACTGCGTTAA-----                                                                  | 693  |
| V7 (1)    | TAACTGCGTTAA-----                                                                  | 693  |
| V8 (1)    | TAACTGCCTTAA-----                                                                  | 693  |
| V9 (2)    | TAACTTCGTTAA-----                                                                  | 693  |
| V10 (1)   | TAACTGCGTTAA-----                                                                  | 693  |
| V11 (1)   | TAACTGCGTTAA-----                                                                  | 693  |
| V12 (2)   | TAACTGCGTTAA-----                                                                  | 687  |
| V13 (3)   | TAACTGCGTTAA-----                                                                  | 693  |
|           | ***** * ****                                                                       |      |

Primer regions are in bold, underlined and italicized text.



**Table S6b: Tp4 protein variant Clustal alignment**

|           |                                                                          |     |
|-----------|--------------------------------------------------------------------------|-----|
| XP_763228 | ATQYFADKNVFCAGRVDENDLIRTSKATGASIQTTLN <del>NSVDVLGTCGVFEEVQIGSERY</del>  | 360 |
| V1 (10)   | --QYFADKNVFCAGRVDENDLIRTSKATGASIQTTLNNSVDVLGTCGVFEEVQIGSERY              | 58  |
| V2 (1)    | --QYFADKNVFCAGRVDENDLIRTSKATGASIQTTLNNSVDVLGTCGVFEEVQIGSERY              | 58  |
| V3 (6)    | --QYFADKNVFCAGRVDENDLIRTSKATGASIQTTLNNSVDVLGTCGVFEEVQIGSERY              | 58  |
| V4 (4)    | --QYFADKNVFCAGRVDENDLIRTSKATGASIQTTLNNSVDVLGTCGVFEEVQIGSERY              | 58  |
| V5 (2)    | --QYFADKNVFCAGRVDENDLIRTSKATGASIQTTLNNSVDVLGTCGVFEEVQIGSERY              | 58  |
| V6 (1)    | --QYFADKNVFCAGRVDENDLIRTSKATGASIQTTLNNSVDVLGTCGVFEEVQIGSERY              | 58  |
|           | *****                                                                    |     |
| XP_763228 | NMFTDCKSAKTCTIVLRGGGQQFIDESERSLHDAIMIVRRATKCNTILPGAGAIEMLLST             | 420 |
| V1 (10)   | NMFTDCKSAKTCTIVLRGGGQQFIDESERSLHDAIMIVRRATKCNTILPGAGAIEMLLST             | 118 |
| V2 (1)    | NMFTDCKSSKTCTIVLRGGGQQFIDESERSLHDAIMIVRRATKCNTILPGAGAIEMLLST             | 118 |
| V3 (6)    | NLFTDCKSAKTCTIVLRGGGQQFIDESERSLHDAIMIVRRATKCNTILPGAGAIEMLLST             | 118 |
| V4 (4)    | NMFTDCKSAKTCTIVLRGGGQQFIDESERSLHDAIMIVRRATKCNTILPGAGAIEMLLST             | 118 |
| V5 (2)    | NMFTDCKSAKTCTIVLRGGGQQFIDESERSLHDAIMIVRRATKCNTILPGAGAIEMLLST             | 118 |
| V6 (1)    | NMFTDCKSAKTCTIVLRGGGQQFIDESERSLHDAIMIVRRATKCNTILPGAGAIEMLLST             | 118 |
|           | * *****                                                                  |     |
| XP_763228 | YLLHYSLNTINPTDSVNHVNCVNSVNHVNGVTGVNKS <del>LVGKRHIIMNGFAKALECIPRNL</del> | 480 |
| V1 (10)   | YLLHYSLNTINPTDSVNHVNCV-----                                              | 140 |
| V2 (1)    | YLLHYSLNTINPTDSVNHVNCV-----                                              | 140 |
| V3 (6)    | YLLHYSLNTINPTDSVNHVNCV-----                                              | 140 |
| V4 (4)    | YLLHYSLNTINPTDSVNHVNCV-----                                              | 140 |
| V5 (2)    | YLLHYSLNTINPTDSVNHVNFV-----                                              | 140 |
| V6 (1)    | YLLHYSLNTINPTDSVNHVNCV-----                                              | 140 |
|           | *****                                                                    |     |

Eptiope region highlighted in grey.

Table S7a: Tp5 nucleotide variant Clustal alignment

|                     |                                                                |     |
|---------------------|----------------------------------------------------------------|-----|
| TP02_0767 (genomic) | TAGAGGAAAGATGAGGAAGCGAGTTTGGGTAAATGCCGGCGATATTATTTTGGTATCGCT   | 539 |
| XM_765334 (mRNA)    | TAGAGGAAAGATGAGGAAGCGAGTTTGGGTAAATGCCGGCGATATTATTTTGGTATCGCT   | 301 |
| V1 (10)             | -----                                                          | 0   |
| V2 (1) *            | -----                                                          | 0   |
| V3 (2)              | -----TAAATGCCGGCGATATTATTTTGGTATCGCT                           | 31  |
| V4 (1)              | -----TAAATGCCGGCGATATTATTTTGGTATCGCT                           | 31  |
| V5 (1) *            | -----TAAATGCCGGCGATATTATTTTGGTATCGCT                           | 31  |
| V6 (1) *            | -----                                                          | 0   |
|                     |                                                                |     |
| TP02_0767 (genomic) | TAGAGATTTCCAGGACAGCAAGGCTGACGTGATCGCAAAGTACACTGCTGAGGAGGCTCG   | 599 |
| XM_765334 (mRNA)    | TAGAGATTTCCAGGACAGCAAGGCTGACGTGATCGCAAAGTACACTGCTGAGGAGGCTCG   | 361 |
| V1 (10)             | -----TTCCAGGACAGCAAGGCTGACGTGATCGCAAAGTACACTGCTGAGGAGGCTCG     | 53  |
| V2 (1) *            | -----TTCCAGGACAGCAAGGCTGACGTGATCGCAAAGTACACTGCTGAGGAGGCTCG     | 53  |
| V3 (2)              | TAGAGATTTCCAGGACAGCAAGGCTGACGTGATCGCAAAGTACACTGCTGAGGAGGCTCG   | 91  |
| V4 (1)              | TAGAGATTTCCAGGACAGCAAGGCTGACGTGATCGCAAAGTACACCCTGAGGAGGCGCG    | 91  |
| V5 (1) *            | -----TTCCAGGACAGCAAGGCTGACGTGATCGCAAAGTACACCCTGAGGAGGCGCG      | 53  |
| V6 (1) *            | -----TTCCAGGACAGCAAGGCTGACGTGATCGCAAAGTACACTGCTGAGGAGGCTCG     | 53  |
|                     | ***** **                                                       |     |
|                     |                                                                |     |
| TP02_0767 (genomic) | TACTCTGAAGGCTTACGGCGAGTTGCCTGAAGCGACCAAATCAACGAAACTGACGTGTA    | 659 |
| XM_765334 (mRNA)    | TACTCTGAAGGCTTACGGCGAGTTGCCTGAAGCGACCAAATCAACGAAACTGACGTGTA    | 421 |
| V1 (10)             | TACTCTGAAGGCTTACGGCGAGTTGCCTGAAGCGACCAAATCAACGAAACTGACGTGTA    | 113 |
| V2 (1) *            | TACTCTGAAGGCTTACGGGGAGTTGCCTGAAGCGACCAAATCAACGAAACTGACGTGTA    | 113 |
| V3 (2)              | TACTCTGAAGGCTTACGGGGAGTTGCCTGAAGCGACCAAATCAACGAAACTGACGTGTA    | 151 |
| V4 (1)              | TACTCTCAAGGCTTACGGAGAATTACCTGAAGCAACTAAAATCAACGAAACAGATGTGTA   | 151 |
| V5 (1) *            | TACTCTCAAGGCTTACGGAGAATTACCTGAAGCAACTAAAATCAACGAAACAGATGTGTA   | 113 |
| V6 (1) *            | TACTCTGAAGGCTTACGGTGAGTTGCCTGAAGCGACCAAATCAACGAAACTGACGTGTA    | 113 |
|                     | ***** **                                                       |     |
|                     |                                                                |     |
| TP02_0767 (genomic) | CGACGACGAGGCCGACAACCTGCATTGACTTCCAGGACGTATCGTCTGAATCAGAACCTGA  | 719 |
| XM_765334 (mRNA)    | CGACGACGAGGCCGACAACCTGCATTGACTTCCAGGACGTATCGTCTGAATCAGAACCTGA  | 481 |
| V1 (10)             | CGACGACGAGGCCGACAACCTGCATTGACTTCCAGGACGTATCGTCTGAATCAGAACCTGA  | 173 |
| V2 (1) *            | CGACGACGAGGCCGACAACCTGCATTGACTTCCAGGACGTATCCTCTGAATCAGAACCTGA  | 173 |
| V3 (2)              | CGACGACGAGGCCGACAACCTGCATTGACTTCCAGGACGTATCGTCTGAATCAGAACCTGA  | 211 |
| V4 (1)              | CGACGACCAGGCTGACAACCTGCATTGACTTCCCGGACGTTTCCCTCCGAGTCCGAACCCGA | 211 |
| V5 (1) *            | CGACGACGAGGCTGACAACCTGCATTGACTTCCAGGACGTTTCCATCCGAGTCCGAACCCGA | 173 |
| V6 (1) *            | CGACGACGAGGCCGACAATTGCATTGACTTCCAGGACGTATCCTCTGAATCAGAACCTGA   | 173 |

```

*****  *****  *****  *****  *****  *****  **  **  **  **  *****  **
TP02_0767 (genomic)  GGATGAGTCACAAGAGGAGTCGGATTT-----  746
XM_765334 (mRNA)    GGATGAGTCACAAGAGGAGTCGGATTT CGATATCGATGATTTATAA  527
V1 (10)            GGATGAGTCACAAGAGGAGTCGGATTT-----  200
V2 (1) *           GGATGAGTCACAAGAGGAGTCGGATTT-----  200
V3 (2)            GGATGAGTCACAAGAGGAGTCGGATTT-----  238
V4 (1)            AGATGAATCTCAAGAGGAGTCGGATTT-----  238
V5 (1) *           AGATGAATCTCAAGAGGAATCAGAGTT-----  200
V6 (1) *           GGATGAGTCACAAGAGGAGTCGGATTT-----  200
*****  **  *****  **  **  **

```

Primer regions are in bold, underlined and italicized text.

\* Partial sequence as defined by only having either the forward or reverse sequence of the allele available for analysis. This sequence is its own variant due to unique nucleotides.

**Table S7b: Tp5 protein variant Clustal alignment**

```

XP_765334      IRGKMRKRVVWV NAGDIIILVSLRDFQDSKADVI AKYTAAEEARTLKAYGELPEATKINETDV 120
V1 (14)       -----NAGDIIILVSLRDFQDSKADVI AKYTAAEEARTLKAYGELPEATKINETDV 49
V2 (1)        -----NAGDIIILVSLRDFQDSKADVI AKYTAAEEARTLKAYGELPEATKINETDV 49
V3 (1)*       -----FQDSKADVI AKYTAAEEARTLKAYGELPEATKINETDV 37
                *****
                *****

XP_765334      YDDEADNCIDFQDVSSSESEPEDESQEESDFDIDDL 155
V1 (14)       YDDEADNCIDFQDVSSSESEPEDESQEESD----- 78
V2 (1)        YDDQADNCIDFPDVSSSESEPEDESQEESD----- 78
V3 (1)*       YDDEADNCIDFQDVSSSESEPEDESQEESD----- 66
                ***  *****  *****

```

\* Partial sequence as defined by only having either the forward or reverse sequence of the allele available for analysis. This sequence is its own variant due to unique nucleotides.  
Eptiope region highlighted in grey.

Table S8a: Tp6 nucleotide variant Clustal alignment

|                     |                                                              |     |
|---------------------|--------------------------------------------------------------|-----|
| TP01_0188 (genomic) | ATTATTTGTAATGGCTCAGATTCCTGTTGATAAATTCGCTAAATTAGTTACTGGAGCCGG | 60  |
| XM_765715 (mRNA)    | ATTATTTGTAATGGCTCAGATTCCTGTTGATAAATTCGCTAAATTAGTTACTGGAGCCGG | 0   |
| V1 (4)              | -----                                                        | 0   |
| V2 (1)              | -----                                                        | 0   |
| V3 (1)              | -----                                                        | 0   |
| V4 (1)              | -----                                                        | 0   |
| V5 (1)              | -----                                                        | 0   |
| V6 (1)              | -----                                                        | 0   |
| V7 (1)              | -----                                                        | 0   |
| V8 (1)              | -----                                                        | 0   |
| V9 (2)              | -----                                                        | 0   |
| V10 (1)             | -----                                                        | 0   |
| V11 (1)             | -----                                                        | 0   |
| V12 (2)             | -----                                                        | 0   |
| V13 (6)             | -----                                                        | 0   |
|                     |                                                              |     |
| TP01_0188 (genomic) | CTCTGCTCTCTTATTATTCGGTTCAGGTGCCTGGCTTGTCAATTCCAGTTTATACGATGG | 120 |
| XM_765715 (mRNA)    | CTCTGCTCTCTTATTATTCGGTTCAGGTGCCTGGCTTGTCAATTCCAGTTTATACGATG- | 120 |
| V1 (4)              | -TCTGCTCTCTTATTATTCGGTTCAGGTGCCTGGCTTGTCAATTCCAGTTTATACGATGG | 59  |
| V2 (1)              | -TCCGCTCTCTTATTATTCGGTTCAGGTGCCTGGCTTGTCAATTCCAGTTTATACGATGG | 59  |
| V3 (1)              | -TCCGCTCTCTTATTATTCGGTTCAGGTGCCTGGCTTGTCAATTCCAGTTTATACGATGG | 59  |
| V4 (1)              | -TCCGCTCTCTTATTATTCGGTTCAGGTGCCTGGCTTGTCAATTCCAGTTTATACGACGG | 59  |
| V5 (1)              | -----                                                        | 0   |
| V6 (1)              | --CCGCTCTCTTATTATTCGGTTCAGGTGCCTGGCTTGTCAATTCCAGTTTATACGATGG | 58  |
| V7 (1)              | ----GCTCTCTTATTATTCGGTTCAGGTGCCTGGCTTGTCAATTCCAGTTTATACGATGG | 56  |
| V8 (1)              | -TCCGCTCTCTTATTATTCGGTTCAGGTGCCTGGCTTGTCAATTCCAGTTTATACGATGG | 59  |
| V9 (2)              | ----GCTCTCTTATTATTCGGTTCAGGTGCCTGGCTTGTCAATTCCAGTTTATACGATGG | 56  |
| V10 (1)             | -TCCGCTCTCTTATTATTCGGTTCAGGTGCCTGGCTTGTCAATTCCAGTTTATACGATGG | 59  |
| V11 (1)             | -TCTGCTCTCTTATTATTCGGTTCAGGTGCCTGGCTTGTCAATTCCAGTTTATACGATGG | 59  |
| V12 (2)             | -TCCGCTCTCTTATTATTCGGTTCAGGTGCCTGGCTTGTCAATTCCAGTTTATACGATGG | 59  |
| V13 (6)             | -TCTGCTCTCTTATTATTCGGTTCAGGTGCCTGGCTTGTCAATTCCAGTTTATACGATGG | 59  |
|                     |                                                              |     |
| TP01_0188 (genomic) | TAAGATTCTACTCTACTTCCACTTTATATTAGCTTTATTTTATTATATAATATATATAGA | 180 |
| XM_765715 (mRNA)    | -----                                                        | 120 |
| V1 (4)              | TAAGATTCTACTCTACTTCCACTTTATATTAGCTTTATTTTATTATATAATATATATAGA | 119 |
| V2 (1)              | TAAGATTCTACTCGACTTCCACTTTATATTAGCTTTATTTTATTATATAATATATATAAA | 119 |

|                     |                                                                   |     |
|---------------------|-------------------------------------------------------------------|-----|
| V3 (1)              | TAAGATTCTACTCGACTTCCACTTTATATTAGCTTTATTTTATTATTTTATATATATAAAA     | 119 |
| V4 (1)              | TAAGATTCTACTCGACTTCCACTTTATATTAGCTTTATTTTATTATATAATATATATATA      | 119 |
| V5 (1)              | -----TATTTTATTATATAATATATATAAAA                                   | 25  |
| V6 (1)              | TAAGATTCTACTCGACTTCCACTTTATATTAGCTTTATTTTATTATATAATATATATAAAA     | 118 |
| V7 (1)              | TAAGATTCTATTCGACTTCCACTTTATATTAGCTTTATTTTATTATATAATATATATAAAA     | 116 |
| V8 (1)              | TAAGATTCTATTCGACTTCCACTTTATATTAGCTTTATTTTATTATTTTATATATATAAAA     | 119 |
| V9 (2)              | TAAGATTCTACTCGACTTCCACTTTATATTAGCTTTATTTTATTATTTTATATATATAAAA     | 116 |
| V10 (1)             | TAAGATTCTACTCGACTTCCACTTTATATTAGCTTTATTTTATTATTTTATATATATAAAA     | 119 |
| V11 (1)             | TAAGATTCTACTCGACTTCCACTTTATATTAGCTTTATTTTATTATATAATATATATAAAA     | 119 |
| V12 (2)             | TAAGATTCTACTCGACTTCCACTTTATATTAGCTTTATTTTATTATATAATATATATAAAA     | 119 |
| V13 (6)             | TAAGATTCTACTCGACTTCCACTTTATATTAGCTTTATTTTATTATATAATATATATAAAA     | 119 |
| TP01_0188 (genomic) | ATTGTAAAAACAATCTTTAAAAACCTTTATCATTAAATTTTATTGATTTTTTTATTGT        | 238 |
| XM_765715 (mRNA)    | -----                                                             | 120 |
| V1 (4)              | ATTGTAAAAACAATCTTTAAAAACCTTTATCATTAAATTTTATTGATTTTTTTATTGT        | 177 |
| V2 (1)              | ATTGTAAAAATACCCTTTTAAATCCTTTATCATTGATTTTTTATTGATTTTTTTATTGT       | 177 |
| V3 (1)              | ATTGTAAAAATAATCTTTAAAAACCTTTATCATTAAATTTTATTGATTTTTTTATTGT        | 177 |
| V4 (1)              | ATTGTAAAAATACCCTTTTAAATCCTTTATCATTGATTTTTTATTGATTTTTTTATTGT       | 177 |
| V5 (1)              | ATTGTAAAAATACCCTTTTAAATCCTTTATCATTGATTTTTTATTGATTTTTTTATTGT       | 83  |
| V6 (1)              | ATTGTAAAAATACCCTTTTAAATCCTTTATCATTGATTTTTTATTGATTTTTTTATTGT       | 176 |
| V7 (1)              | ATTGTAAAAATACCCTTTTAAATCCTTTATCATTGATTTTTTATTGATTTTTTTATTGT       | 174 |
| V8 (1)              | ATTGTAAAAATAATCTTTAAAAACCTTTATCATTAAATTTTATTGATTTTTTTATTGT        | 177 |
| V9 (2)              | ATTGTAAAAATAATCTTTAAAAACCTTTATCATTAAATTTTATTGATTTTTTTATTGT        | 174 |
| V10 (1)             | ATTGTAAAAATAATCTTTAAAAACCTTTATCATTAAATTTTATTGATTTTTTTATTGT        | 177 |
| V11 (1)             | ATTGTAAAAATACCCTTTTAAATCCTTTATCATTGATTTTTTATTGATTTTTTTATTGT       | 177 |
| V12 (2)             | ATTGTAAAAATACCCTTTTAAATCCTTTATCATTGATTTTTTATTGATTTTTTTATTGT       | 177 |
| V13 (6)             | ATTGTAAAAATACCCTTTTAAATCCTTTATCATTGATTTTTTATTGATTTTTTTATTGT       | 177 |
| TP01_0188 (genomic) | AGTTTATATTGAACAGTAATCATTTTTAGAAATGATTTTTAAATTTGTTAAATATTTTATAAAA  | 298 |
| XM_765715 (mRNA)    | -----                                                             | 120 |
| V1 (4)              | AGTTTATATTGAACAGTAATCATTTTTAGAAATGATTTTTAAATTTGTTAAATATTTTATAAAA  | 237 |
| V2 (1)              | AGTTTATATTGAACAGTAATCATTTTTAGAAATGATTTTTAAATTTGTTAAATATTTTATAAAA  | 237 |
| V3 (1)              | AGTTTATATTGAACAGTAATCATTTTTAGAAATGATTTTTAAATTTGTTAAATATTTTATAAAA  | 237 |
| V4 (1)              | AAATATATTGAACAGTAATGATTTTTAGAAATGATTTTTAAATTTGTTAAATATTTTATAAAA   | 237 |
| V5 (1)              | AGTTTATATTGAACAGTAATCATTTTTAGAAATGATTTTTAAATTTGTTAAATATTTTATAAAA  | 143 |
| V6 (1)              | AGTTTATATTGAACAGTAATCATTTTTAGAAATGATTTTTAAATTTGTTAAATATTTTATAAAA  | 236 |
| V7 (1)              | AGTTTATATTGAACAGTAATCATTTTTAGAAATGATTTTTAAATTTGTTAAATATTTTATAAAA  | 234 |
| V8 (1)              | AGTTTATATTGAACAGTAATCATTTTTAGAAATGACTTTTTAAATTTGTTAAATATTTTATAAAA | 237 |
| V9 (2)              | AGTTTATATTGAACAGTAATCATTTTTAGAAATGATTTTTAAATTTGTTAAATATTTTATAAAA  | 234 |

|         |                                                               |     |
|---------|---------------------------------------------------------------|-----|
| V10 (1) | AGTTATATTGAACAGTAATCATTTTTAGAAATGATTTTTAATTTGTTAAATATTTTATAAA | 237 |
| V11 (1) | AGTTATATTGAACAGTAATCATTTTTAGAAATGATTTTTAATTTGTTAAATATTTTATAAA | 237 |
| V12 (2) | AGTTATATTGAACAGTAATCATTTTTAGAAATGATTTTTAATTTGTTAAATATTTTATAAA | 237 |
| V13 (6) | AGTTATATTGAACAGTAATCATTTTTAGAAATGATTTTTAATTTGTTAAATATTTTATAAA | 237 |

|                     |                                                              |     |
|---------------------|--------------------------------------------------------------|-----|
| TP01_0188 (genomic) | TTTTACTATTTAATGTCTCTTTAATGTTGAATTAGTTGGAGCTGGGCATAGAGCTGTTGT | 358 |
| XM_765715 (mRNA)    | -----TTGGAGCTGGGCATAGAGCTGTTGT                               | 144 |
| V1 (4)              | TTTTACTATTTAATGTCTCTTTAATGTTGAATTAGTTGGAGCTGGGCATAGAGCTGTTGT | 297 |
| V2 (1)              | TTTTACGATTTAATATCTCTTTAATGTTGAATTAGTTGGAGCTGGGCATAGAGCTGTTGT | 297 |
| V3 (1)              | TTTTACGATTTAATATCTCTTTAATGTTGAATTAGTTGGAGCTGGGCATAGAGCTGTCGT | 297 |
| V4 (1)              | TTTTACTATTTAATGTCTCTTTAATGTTGAATTAGTTGGAGCTGGGCATAGAGCTGTCGT | 297 |
| V5 (1)              | TTTTACGATTTAATATCTCTTTAATGTTGAATTAGTTGGAGCTGGGCATAGAGCTGTTGT | 203 |
| V6 (1)              | TTTTACGATTTAATATCTCTTTAATGTTGAATTAGTTGGAGCTGGGCATAGAGCTGTCGT | 296 |
| V7 (1)              | TTTTACTATTTAATATCTCTTTAATGTTGAATTAGTTGGAGCTGGGCATAGAGCTGTTGT | 294 |
| V8 (1)              | TTTTACTATTTAATGTCTCTTTAATGTTGAATTAGTTGGAGCTGGGCATAGAGCTGTCGT | 297 |
| V9 (2)              | TTTTACGATTTAATATCTCTTTAATGTTGAATTAGTTGGAGCTGGGCATAGAGCTGTCGT | 294 |
| V10 (1)             | TTTTACGATTTAATATCTCTTTAATGTTGAATTAGTTGGAGCTGGGCATAGAGCTGTCGT | 297 |
| V11 (1)             | TTTTACGATTTAATATCTCTTTAATGTTGAATTAGTTGGAGCTGGGCATAGAGCTGTCGT | 297 |
| V12 (2)             | TTTTACGATTTAATATCTCTTTAATGTTGAATTAGTTGGAGCTGGGCATAGAGCTGTTGT | 297 |
| V13 (6)             | TTTTACGATTTAATATCTCTTTAATGTTGAATTAGTTGGAGCTGGGCATAGAGCTGTCGT | 297 |

\*\*\*\*\*

|                     |                                                              |     |
|---------------------|--------------------------------------------------------------|-----|
| TP01_0188 (genomic) | ATATAACCGTATCACTGGAATAAGTGAGACTACACATGGAGAAGGAACGCACTTCATAAT | 418 |
| XM_765715 (mRNA)    | ATATAACCGTATCACTGGAATAAGTGAGACTACACATGGAGAAGGAACGCACTTCATAAT | 204 |
| V1 (4)              | ATATAACCGTATCACTGGAATAAGTGAGACTACACATGGAGAAGGAACGCACTTCATAAT | 357 |
| V2 (1)              | ATATAACCGTATCACTGGAATAAGTGAGACTACACATGGAGAAGGAACCCACTTCATAAT | 357 |
| V3 (1)              | ATATAACCGTATCACTGGAATAAGTGAGACTACACATGGAGAAGGAACGCACTTCATAAT | 357 |
| V4 (1)              | ATATAACCGTATCACTGGAATAAGTGAGACTACACATGGAGAAGGAACCCACTTCATAAT | 357 |
| V5 (1)              | ATATAACCGTATCACTGGAATAAGTGAGACTACACATGGAGAAGGAACCCACTTCATAAT | 263 |
| V6 (1)              | ATATAACCGTATCACTGGAATAAGTGAGACTACACATGGAGAAGGAACCCACTTCATAAT | 356 |
| V7 (1)              | ATATAACCGTATCACTGGAATAAGTGAGACTACACATGGAGAAGGAACGCACTTCATAAT | 354 |
| V8 (1)              | ATATAACCGTATCACTGGAATAAGTGAGACTACACATGGAGAAGGAACGCACTTCATAAT | 357 |
| V9 (2)              | ATATAACCGTATCACTGGAATAAGTGAGACTACACATGGAGAAGGAACGCACTTCATAAT | 354 |
| V10 (1)             | ATATAACCGTATCACTGGAATAAGTGAGACTACACATGGAGAAGGAACGCACTTCATAAT | 357 |
| V11 (1)             | ATATAACCGTATCACTGGAATAAGTGAGACTACACATGGAGAAGGAACCCACTTCATAAT | 357 |
| V12 (2)             | ATATAACCGTATCACTGGAATAAGTGAGACTACACATGGAGAAGGAACCCACTTCATAAT | 357 |
| V13 (6)             | ATATAACCGTATCACTGGAATAAGTGAGACTACACATGGAGAAGGAACCCACTTCATAAT | 357 |

\*\*\*\*\*

|                     |                                                              |     |
|---------------------|--------------------------------------------------------------|-----|
| TP01_0188 (genomic) | TCCCTGGCTAGAACGTCCAATAATTTACGATGTGAGGACTCGTCCTAGGACTCTGATGTC | 478 |
|---------------------|--------------------------------------------------------------|-----|

|                     |                                                              |     |
|---------------------|--------------------------------------------------------------|-----|
| XM_765715 (mRNA)    | TCCCTGGCTAGAACGTCCAATAATTTACGATGTGAGGACTCGTCCTAGGACTCTGATGTC | 264 |
| V1 (4)              | TCCCTGGCTAGAACGTCCAATAATTTACGATGTGAGGACTCGTCCTAGGACTCTGATGTC | 417 |
| V2 (1)              | TCCCTGGCTAGAACGTCCAATAATTTACGATGTGAGGACTCGTCCTAGGACTCTGATGTC | 417 |
| V3 (1)              | TCCCTGGTTAGAGCGTCCAATAATTTACGATGTGAGGACTCGTCCTAGGACTCTGATGTC | 417 |
| V4 (1)              | TCCCTGGTTAGAGCGTCCAATAATTTACGATGTGAGGACTCGTCCTAGGACTCTGATGTC | 417 |
| V5 (1)              | TCCCTGGTTAGAGCGTCCAATAATTTACGATGTGAGGACTCGTCCTAGGACTCTGATGTC | 323 |
| V6 (1)              | TCCATGGTTAGAGCGTCCAATAATTTACGATGTGAGGACTCGTCCTAGGACTCTGATGTC | 416 |
| V7 (1)              | TCCATGGTTAGAGCGTCCAATAATTTACGATGTGAGGACTCGTCCTAGGACTCTGATGTC | 414 |
| V8 (1)              | TCCCTGGTTAGAGCGTCCAATAATTTACGATGTGAGGACTCGTCCTAGGACTCTGATGTC | 417 |
| V9 (2)              | TCCCTGGTTAGAGCGTCCAATAATTTACGATGTGAGGACTCGTCCTAGGACTCTGATGTC | 414 |
| V10 (1)             | TCCCTGGTTAGAGCGTCCAATAATTTACGATGTGAGGACTCGTCCTAGGACTCTGATGTC | 417 |
| V11 (1)             | TCCATGGTTAGAGCGTCCAATAATTTACGATGTGAGGACTCGTCCTAGGACTCTGATGTC | 417 |
| V12 (2)             | TCCCTGGCTAGAACGTCCAATAATTTACGATGTGAGGACTCGTCCTAGGACTCTGATGTC | 417 |
| V13 (6)             | TCCATGGTTAGAGCGTCCAATAATTTACGATGTGAGGACTCGTCCTAGGACTCTGATGTC | 417 |
|                     | *** **                                                       |     |
| TP01_0188 (genomic) | TCTCACCGBAAGCCGTGACTTGCAGATGGTTAACATCACCTGCCGTGTGTTGTCTCGTCC | 538 |
| XM_765715 (mRNA)    | TCTCACCGBAAGCCGTGACTTGCAGATGGTTAACATCACCTGCCGTGTGTTGTCTCGTCC | 324 |
| V1 (4)              | TCTCACCGBAAGCCGTGACTTGCAGATGGTTAACATCACCTGCCGTGTGTTGTCTCGTCC | 477 |
| V2 (1)              | TCTCACCGBAAGCCGTGACTTGCAGATGGTTAACATCACCTGCCGTGTGTTGTCTCGTCC | 477 |
| V3 (1)              | TCTCACCGBAAGCCGTGACTTGCAGATGGTTAACATCACCTGCCGTGTGTTGTCTCGTCC | 477 |
| V4 (1)              | TCTCACCGBAAGCCGTGACTTGCAGATGGTTAACATCACCTGCCGTGTGTTGTCTCGTCC | 477 |
| V5 (1)              | TCTCACCGBAAGCCGTGACTTGCAGATGGTTAACATCACCTGCCGTGTGTTGTCTCGTCC | 383 |
| V6 (1)              | TCTCACCGBAAGCCGTGACTTGCAGATGGTTAACATCACCTGCCGTGTGTTGTCTCGTCC | 476 |
| V7 (1)              | TCTCACCGBAAGCCGTGACTTGCAGATGGTTAACATCACCTGCCGTGTGTTGTCTCGTCC | 474 |
| V8 (1)              | TCTCACCGBAAGCCGTGACTTGCAGATGGTTAACATCACCTGCCGTGTGTTGTCTCGTCC | 477 |
| V9 (2)              | TCTCACCGBAAGCCGTGACTTGCAGATGGTTAACATCACCTGCCGTGTGTTGTCTCGTCC | 474 |
| V10 (1)             | TCTCACCGBAAGCCGTGACTTGCAGATGGTTAACATCACCTGCCGTGTGTTGTCTCGTCC | 477 |
| V11 (1)             | TCTCACCGBAAGCCGTGACTTGCAGATGGTTAACATCACCTGCCGTGTGTTGTCTCGTCC | 477 |
| V12 (2)             | TCTCACCGBAAGCCGTGACTTGCAGATGGTTAACATCACCTGCCGTGTGTTGTCTCGTCC | 477 |
| V13 (6)             | TCTCACCGBAAGCCGTGACTTGCAGATGGTTAACATCACCTGCCGTGTGTTGTCTCGTCC | 477 |
|                     | *****                                                        |     |
| TP01_0188 (genomic) | CGATGAGCGCAGACTCAGGGATATTTACAGGCACTTGGGCAAAGATTACGACGAGCGAGT | 598 |
| XM_765715 (mRNA)    | CGATGAGCGCAGACTCAGGGATATTTACAGGCACTTGGGCAAAGATTACGACGAGCGAGT | 384 |
| V1 (4)              | CGATGAGCGCAGACTCAGGGATATTTACAGGCACTTGGGCAAAGATTACGACGAGCGAGT | 537 |
| V2 (1)              | CGATGAGCGCAGACTCAGGGATATTTACAGGCACTTGGGGAAAGACTATGACGAGCGAGT | 537 |
| V3 (1)              | CGATGAGCGCAGACTCAGGGATATTTACAGGCACTTGGGGAAAGACTATGACGAGCGAGT | 537 |
| V4 (1)              | CGATGAGCGCAGACTCAGGGATATTTACAGGCACTTGGGGAAAGACTATGACGAGCGAGT | 537 |
| V5 (1)              | CGATGAGCGCAGACTCAGGGATATTTACAGGCACTTGGGGAAAGATTATGACGAGCGAGT | 443 |
| V6 (1)              | CGATGAGCGCAGACTCAGGGATATTTACAGGCACTTGGGGAAAGACTATGACGAGCGAGT | 536 |



|         |                                                                                |     |
|---------|--------------------------------------------------------------------------------|-----|
| V7 (1)  | TGATGAGCGCAGACTCAGGGATATTTACAGGCACTTGGGGAAAGACTATGACGAGCGAGT                   | 534 |
| V8 (1)  | CGATGAGCGCAGACTCAGGGATATTTACAGGCACTTGGGGAAAGACTATGACGAGCGAGT                   | 537 |
| V9 (2)  | CGATGAGCGCAGACTCAGGGATATTTACAGGCACTTGGGGAAAGACTATGACGAGCGAGT                   | 534 |
| V10 (1) | CGATGAGCGCAGACTCAGGGATATTTACAGGCACTTGGGGAAAGACTATGACGAGCGAGT                   | 537 |
| V11 (1) | CGATGAGCGCAGACTCAGGGATATTTACAGGCACTTGGGGAAAGACTATGACGAGCGAGT                   | 537 |
| V12 (2) | CGATGAGCGCAGACTCAGGGATATTTACAGGCACTTGGGGAAAGACTATGACGAGCGAGT                   | 537 |
| V13 (6) | CGATGAGCGCAGACTCAGGGATATTTACAGGCACTTGGGGAAAGACTATGACGAGCGAGT<br>***** ** ***** | 537 |

|                     |                                                                               |     |
|---------------------|-------------------------------------------------------------------------------|-----|
| TP01_0188 (genomic) | CCTGCCTTCAATAATAAACGAGGTTCTGAAGAGTATTGTGGCCAGTACAACGCCTCTCA                   | 658 |
| XM_765715 (mRNA)    | CCTGCCTTCAATAATAAACGAGGTTCTGAAGAGTATTGTGGCCAGTACAACGCCTCTCA                   | 444 |
| V1 (4)              | CCTGCCTTCAATAATAAACGAGGTTCTGAAGAGTATTGTGGCCAGTACAACGCCTCTCA                   | 597 |
| V2 (1)              | CCTGCCTTCAATAATAAACGAGGTTCTGAAGAGTATTGTGGCCAGTACAACGCCTCTCA                   | 597 |
| V3 (1)              | CCTGCCTTCAATAATAAACGAGGTTCTGAAGAGTATTGTGGCCAGTACAACGCCTCTCA                   | 597 |
| V4 (1)              | CCTGCCTTCAATAATAAACGAGGTTCTGAAGAGTATTGTGGCCAGTACAACGCCTCTCA                   | 597 |
| V5 (1)              | CCTGCCTTCAATAATAAACGAGGTTCTGAAGAGTATTGTGGCCAGTACAACGCCTCTCA                   | 503 |
| V6 (1)              | CCTGCCTTCAATAATAAACGAGGTTCTGAAGAGTATTGTGGCCAGTACAACGCCTCTCA                   | 596 |
| V7 (1)              | CCTGCCTTCAATAATAAACGAGGTTCTGAAGAGTATTGTGGCCAGTACAACGCCTCTCA                   | 594 |
| V8 (1)              | CCTGCCTTCAATAATAAACGAGGTTCTGAAGAGTATTGTGGCCAGTACAACGCCTCTCA                   | 597 |
| V9 (2)              | CCTGCCTTCAATAATAAACGAGGTTCTGAAGAGTATTGTGGCCAGTACAACGCCTCTCA                   | 594 |
| V10 (1)             | CCTGCCTTCAATAATAAACGAGGTTCTGAAGAGTATTGTGGCCAGTACAACGCCTCTCA                   | 597 |
| V11 (1)             | CCTGCCTTCAATAATAAACGAGGTTCTGAAGAGTATTGTGGCCAGTACAACGCCTCTCA                   | 597 |
| V12 (2)             | CCTGCCTTCAATAATAAACGAGGTTCTGAAGAGTATTGTGGCCAGTACAACGCCTCTCA                   | 597 |
| V13 (6)             | CCTGCCTTCAATAATAAACGAGGTTCTGAAGAGTATTGTGGCCAGTACAACGCCTCTCA<br>***** ** ***** | 597 |

|                     |                                                              |     |
|---------------------|--------------------------------------------------------------|-----|
| TP01_0188 (genomic) | GCTCATTACTCAGAGAGAAAGAGTTAGCAAAGCAGTCAGGGACCAGCTGGTGAACAGGGC | 718 |
| XM_765715 (mRNA)    | GCTCATTACTCAGAGAGAAAGAGTTAGCAAAGCAGTCAGGGACCAGCTGGTGAACAGGGC | 504 |
| V1 (4)              | GCTCATTACTCAGAGAGAAAGAGTTAGCAAAGCAGTCAGGGACCAGCTGGTGAACAGGGC | 657 |
| V2 (1)              | GCTCATTACTCAGAGAGAAAGAGTTAGCAAAGCAGTCAGGGACCAGCTGGTGAACAGGGC | 657 |
| V3 (1)              | GCTCATTACTCAGAGAGAAAGAGTTAGCAAAGCAGTCAGGGACCAGCTGGTGAACAGGGC | 657 |
| V4 (1)              | GCTCATTACTCAGAGAGAAAGAGTTAGCAAAGCAGTCAGGGACCAGCTGGTGAACAGGGC | 657 |
| V5 (1)              | GCTCATTACTCAGAGAGAAAGAGTTAGCAAAGCAGTCAGGGACCAGCTGGTGAACAGGGC | 563 |
| V6 (1)              | GCTCATTACTCAGAGAGAAAGAGTTAGCAAAGCAGTCAGGGACCAGCTGGTGAACAGGGC | 656 |
| V7 (1)              | GCTCATTACTCAGAGAGAAAGAGTTAGCAAAGCAGTCAGGGACCAGCTGGTGAACAGGGC | 654 |
| V8 (1)              | GCTCATTACTCAGAGAGAAAGAGTTAGCAAAGCAGTCAGGGACCAGCTGGTGAACAGGGC | 657 |
| V9 (2)              | GCTCATTACTCAGAGAGAAAGAGTTAGCAAAGCAGTCAGGGACCAGCTGGTGAACAGGGC | 654 |
| V10 (1)             | GCTCATTACTCAGAGAGAAAGAGTTAGCAAAGCAGTCAGGGACCAGCTGGTGAACAGGGC | 657 |
| V11 (1)             | GCTCATTACTCAGAGAGAAAGAGTTAGCAAAGCAGTCAGGGACCAGCTGGTGAACAGGGC | 657 |
| V12 (2)             | GCTCATTACTCAGAGAGAAAGAGTTAGCAAAGCAGTCAGGGACCAGCTGGTGAACAGGGC | 657 |
| V13 (6)             | GCTCATTACTCAGAGAGAAAGAGTTAGCAAAGCAGTCAGGGACCAGCTGGTGAACAGGGC | 657 |

\*\*\*\*\*

|                     |                                                              |     |
|---------------------|--------------------------------------------------------------|-----|
| TP01_0188 (genomic) | CAGGGACTTTAATATTCTTCTCGATGATGTCTCCTTAACCCACTTAAGCTTCAGTCCTGA | 778 |
| XM_765715 (mRNA)    | CAGGGACTTTAATATTCTTCTCGATGATGTCTCCTTAACCCACTTAAGCTTCAGTCCTGA | 564 |
| V1 (4)              | CAGGGACTTTAATATTCTTCTCGATGATGTCTCCTTAACCCACTTAAGCTTCAGTCCTGA | 717 |
| V2 (1)              | CAGGGACTTCAACATTCTTCTTGATGATGTCTCCTTAACCCACTTAAGCTTCAGTCCTGA | 717 |
| V3 (1)              | CAGGGACTTTAACATTCTTCTTGATGATGTCTCCTTAACCCACTTAAGCTTCAGTCCTGA | 717 |
| V4 (1)              | CAGGGACTTTAATATTCTTCTTGATGATGTCTCCTTAACCCACTTAAGCTTCAGTCCTGA | 717 |
| V5 (1)              | CAGGGACTTTAACATTCTTCTTGATGATGTCTCCTTAACCCACTTAAGCTTCAGTCCTGA | 623 |
| V6 (1)              | CAGGGACTTTAACATTCTTCTTGATGATGTCTCCTTAACCCACTTAAGCTTCAGTCCTGA | 716 |
| V7 (1)              | CAGGGACTTTAACATTCTTCTTGATGATGTCTCCTTAACCCACTTAAGCTTCAGTCCTGA | 714 |
| V8 (1)              | CAGGGACTTTAACATTCTTCTTGATGATGTCTCCTTAACCCACTTAAGCTTCAGTCCTGA | 717 |
| V9 (2)              | CAGGGACTTTAACATTCTTCTTGATGATGTCTCCTTAACCCACTTAAGCTTCAGTCCTGA | 714 |
| V10 (1)             | CAGGGACTTTAACATTCTTCTTGATGATGTCTCCTTAACCCACTTAAGCTTCAGTCCTGA | 717 |
| V11 (1)             | CAGGGACTTTAATATTCTTCTTGATGATGTCTCCTTAACCCACTTAAGCTTCAGTCCTGA | 717 |
| V12 (2)             | CAGGGACTTCAACATTCTTCTTGATGATGTCTCCTTAACCCACTTAAGCTTCAGTCCTGA | 717 |
| V13 (6)             | CAGGGACTTTAATATTCTTCTTGATGATGTCTCCTTAACCCACTTAAGCTTCAGTCCTGA | 717 |

\*\*\*\*\* \*\* \*\*\*\*\*

|                     |                                                              |     |
|---------------------|--------------------------------------------------------------|-----|
| TP01_0188 (genomic) | ATATGAAAAGGCTGTAGAGGCTAAACAAGTAGCTCAACAGCAAGCTGAACGCAGTAAATA | 838 |
| XM_765715 (mRNA)    | ATATGAAAAGGCTGTAGAGGCTAAACAAGTAGCTCAACAGCAAGCTGAACGCAGTAAATA | 624 |
| V1 (4)              | ATATGAAAAGGCTGTAGAGGCTAAACAAGTAGCTCAACAGCAAGCTGAACGCAGTAAATA | 777 |
| V2 (1)              | ATATGAAAAGGCTGTAGAGGCTAAACAAGTAGCTCAACAGCAAGCTGAACGCAGTAAATA | 777 |
| V3 (1)              | ATATGAAAAGGCTGTAGAGGCTAAACAAGTAGCTCAACAGCAAGCTGAACGCAGTAAATA | 777 |
| V4 (1)              | ATATGAAAAGGCTGTAGAGGCTAAACAAGTAGCTCAACAGCAAGCTGAACGCAGTAAATA | 777 |
| V5 (1)              | ATATGAAAAGGCTGTAGAGGCTAAACAAGTAGCTCAACAGCAAGCTGAACGTAGTAAATA | 683 |
| V6 (1)              | ATATGAAAAGGCTGTAGAGGCTAAACAAGTAGCTCAACAGCAAGCTGAACGTAGTAAATA | 776 |
| V7 (1)              | ATATGAAAAGGCTGTAGAGGCTAAACAAGTAGCTCAACAGCAAGCTGAACGCAGTAAATA | 774 |
| V8 (1)              | ATATGAAAAGGCTGTAGAGGCTAAACAAGTAGCTCAACAGCAAGCTGAACGCAGTAAATA | 777 |
| V9 (2)              | ATATGAAAAGGCTGTAGAGGCTAAACAAGTAGCTCAACAGCAAGCTGAACGCAGTAAATA | 774 |
| V10 (1)             | ATATGAAAAGGCTGTAGAGGCTAAACAAGTAGCTCAACAGCAAGCTGAACGCAGTAAATA | 777 |
| V11 (1)             | ATATGAAAAGGCTGTAGAGGCTAAACAAGTAGCTCAGCAGCAAGCTGAACGCAGTAAATA | 777 |
| V12 (2)             | ATATGAAAAGGCTGTAGAGGCTAAACAAGTAGCTCAACAGCAAGCTGAACGCAGTAAATA | 777 |
| V13 (6)             | ATATGAAAAGGCTGTAGAGGCTAAACAAGTAGCTCAGCAGCAAGCTGAACGCAGTAAATA | 777 |

\*\*\*\*\* \*\* \*\*\*\*\*

|                     |                                                              |     |
|---------------------|--------------------------------------------------------------|-----|
| TP01_0188 (genomic) | TATAGTGTTGAAGGCTCAGGAGGAGAAGAAATCGACGATAATTAAGGCTCAGGGAGAGTC | 898 |
| XM_765715 (mRNA)    | TATAGTGTTGAAGGCTCAGGAGGAGAAGAAATCGACGATAATTAAGGCTCAGGGAGAGTC | 684 |
| V1 (4)              | TATAGTGTTGAAGGCTCAGGAGGAGAAGAAATCGACGATAATTAAGGCTCAGGGAGAGTC | 837 |
| V2 (1)              | TATAGTGTTGAAGGCTCAGGAGGAGAAGAAATC-----                       | 810 |
| V3 (1)              | TATAGTGTTGAAGGCTCAGGAGGAGAAGAAATCGACGATAATTAAGGCTCAGGGAGATTC | 837 |

|                     |                                                                       |      |
|---------------------|-----------------------------------------------------------------------|------|
| V4 (1)              | TATAGTGTTGAAGGCTCAGGAGGAGAAGAAATCGACGATAATTAAGGCTCAGGGAGAGTC          | 837  |
| V5 (1)              | TATAGTGTTGAAGGCTCAGGAGGAGAAGAAATCGACGATAATTAAGGCTCAGGGAGAGTC          | 743  |
| V6 (1)              | TATAGTGTTGAAGGCTCAGGAGGAGAAGAAATCGACGATAATTAAGGCTCAGGGAGAGTC          | 836  |
| V7 (1)              | TATAGTGTTGAAGGCTCAGGAGGAGAAGAAATCGACGATAATTAAGGCTCAGGGAGAGTC          | 834  |
| V8 (1)              | TATAGTGTTGAAGGCTCAGGAGGAGAAGAAATCGACGATAATTAAGGCTCAGGGAGAGTC          | 837  |
| V9 (2)              | TATAGTGTTGAAGGCTCAGGAGGAGAAGAAATCGACGATAATTAAGGCTCAGGGAGAGTC          | 834  |
| V10 (1)             | TATAGTGTTGAAGGCTCAGGAGGAGAAGAAATCGACGATAATTAAGGCTCAGGGAGATTC          | 837  |
| V11 (1)             | TATAGTGTTGAAGGCTCAGGAGGAGAAGAAATCGACGATAATTAAGGCTCAGGGAGAGTC          | 837  |
| V12 (2)             | TATAGTGTTGAAGGCTCAGGAGGAGAAGAAATC-----                                | 810  |
| V13 (6)             | TATAGTGTTGAAGGCTCAGGAGGAGAAGAAATCGACGATAATTAAGGCTCAGGGAGAGTC<br>***** | 837  |
| TP01_0188 (genomic) | TGAGGCTGCAAGGCTTATTGGAAGTGCAATTAAGGATAACCCTGCCTTTATTACGCTTCG          | 958  |
| XM_765715 (mRNA)    | TGAGGCTGCAAGGCTTATTGGAAGTGCAATTAAGGATAACCCTGCCTTTATTACGCTTCG          | 744  |
| V1 (4)              | TGAGGCTGCAAGGCTTATTGGAAGTGCAATTAAGGATAACCCTGCCTTTATTACGCTTCG          | 897  |
| V2 (1)              | -----                                                                 | 810  |
| V3 (1)              | TGAGGCTGCAAGGCTTATTGGAAGTGCAATTAAGGATAACCCTGCCTTTATTACGCTTCG          | 897  |
| V4 (1)              | TGAGGCTGCAAGGCTTATTGGAAGTGCAATTAAGGATAACCCTGCCTTTATTACGCTTCG          | 897  |
| V5 (1)              | TGAGGCTGCAAGGCTTATTGGAAGTGCAATTAAGGATAACCC-----                       | 785  |
| V6 (1)              | TGAGGCTGCAAGGCTTATTGGAAGTGCAATTAAGGATAACCCTGCCTTTATTACGCTTCG          | 896  |
| V7 (1)              | TGAGGCTGCAAGG-----                                                    | 847  |
| V8 (1)              | TGAGGCTGCAAGGCTTATTGGAAGTGCAATTAAGGATAACCCTGCCTTTATTACGCTTCG          | 897  |
| V9 (2)              | TGAGGCTGCAAGGCTTATTGGAAGTGCAATTAAGGATAACCCTGCCTTTATTACGCTTCG          | 894  |
| V10 (1)             | TGAGGCTGCAAGGCTTATTGGAAGTGCAATTAAGGATAACCCTGCCTTTATTACGCTTCG          | 897  |
| V11 (1)             | TGAGGCTGCAAGGCTTATTGGAAGTGCAATTAAGGATAACCCTGCCTTTATTACGCTTCG          | 897  |
| V12 (2)             | -----                                                                 | 810  |
| V13 (6)             | TGAGGCTGCAAGGCTTATTGGAAGTGCAATTAAGGATAACCCTGCCTTTATTACGCTTCG          | 897  |
| TP01_0188 (genomic) | GAGAATTGAAACCGCTAAGGAAGTGGCTAACATTCTCTCCAAATCGCAGAATAAAATCAT          | 1018 |
| XM_765715 (mRNA)    | GAGAATTGAAACCGCTAAGGAAGTGGCTAACATTCTCTCCAAATCGCAGAATAAAATCAT          | 804  |
| V1 (4)              | GAGAATTGAAACCGCTAAGGAAGTGGCTAACATT-----                               | 931  |
| V2 (1)              | -----                                                                 | 810  |
| V3 (1)              | GAGAATTGAAACCGCTAAGGAAGTGGCTAACATT-----                               | 931  |
| V4 (1)              | GAGAATTGAAACCGCTAAGGAAGTGGCTAACATT-----                               | 931  |
| V5 (1)              | -----                                                                 | 785  |
| V6 (1)              | GAGAATTGAAACCGCTAAGGAAGTGGCTAACATT-----                               | 930  |
| V7 (1)              | -----                                                                 | 847  |
| V8 (1)              | GAGAATTGAAACCGCTAAGGAAGTGGCTAACATT-----                               | 931  |
| V9 (2)              | GAGAATTGAAACCGCTAAGGAAGTGGCTAACATT-----                               | 928  |
| V10 (1)             | GAGAATTGAAACCGCTAAGGAAGTGGCTAACATT-----                               | 931  |

|                     |                                                              |      |
|---------------------|--------------------------------------------------------------|------|
| V11 (1)             | GAGAATTGAAACCGCTAAGGAAGTGGCTAACATT-----                      | 931  |
| V12 (2)             | -----                                                        | 810  |
| V13 (6)             | GAGAATTGAAACCGCTAAGGAAGTGGCTAACATT-----                      | 931  |
| TP01_0188 (genomic) | GCTCAATAGTAATACTCTCTTACTCTCAACTGATAAATAATATTATCAATCCTCCAATAT | 1078 |
| XM_765715 (mRNA)    | GCTCAATAGTAATACTCTCTTACTCTCAACTGATAAATAATATTATCAATCCTCCAATAT | 864  |
| V1 (4)              | -----                                                        | 931  |
| V2 (1)              | -----                                                        | 810  |
| V3 (1)              | -----                                                        | 931  |
| V4 (1)              | -----                                                        | 931  |
| V5 (1)              | -----                                                        | 785  |
| V6 (1)              | -----                                                        | 930  |
| V7 (1)              | -----                                                        | 847  |
| V8 (1)              | -----                                                        | 931  |
| V9 (2)              | -----                                                        | 928  |
| V10 (1)             | -----                                                        | 931  |
| V11 (1)             | -----                                                        | 931  |
| V12 (2)             | -----                                                        | 810  |
| V13 (6)             | -----                                                        | 931  |
| TP01_0188 (genomic) | GCTATTATAT                                                   | 1088 |
| XM_765715 (mRNA)    | GCTATTATAT                                                   | 874  |
| V1 (4)              | -----                                                        | 931  |
| V2 (1)              | -----                                                        | 810  |
| V3 (1)              | -----                                                        | 931  |
| V4 (1)              | -----                                                        | 931  |
| V5 (1)              | -----                                                        | 785  |
| V6 (1)              | -----                                                        | 930  |
| V7 (1)              | -----                                                        | 847  |
| V8 (1)              | -----                                                        | 931  |
| V9 (2)              | -----                                                        | 928  |
| V10 (1)             | -----                                                        | 931  |
| V11 (1)             | -----                                                        | 931  |
| V12 (2)             | -----                                                        | 810  |
| V13 (6)             | -----                                                        | 931  |

Primer regions are in bold, underlined and italicized text.

<sup>1</sup> Include X.1 variants.

**Table S8b: Tp6 protein variant Clustal alignment**

|                      |                                                              |     |
|----------------------|--------------------------------------------------------------|-----|
| XP_765715            | MAQIPVDKFAKLVTGAGSALLLFGSGAWLVNSSLYDVGAGHRAVVYNRITGISETHGEG  | 60  |
| V1 (22) <sup>1</sup> | -----VGAGHRAVVYNRITGISETHGEG                                 | 24  |
| V2 (1)               | -----VGAGHRAVVYNRITGISETHGEG                                 | 24  |
|                      | *****                                                        |     |
|                      |                                                              |     |
| XP_765715            | THFIIPWLERPIIYDVRTRPRTLMSLTGSRDLQMVNITCRVLSRPDERRLRDIYRHLGKD | 120 |
| V1 (22)              | THFIIPWLERPIIYDVRTRPRTLMSLTGSRDLQMVNITCRVLSRPDERRLRDIYRHLGKD | 84  |
| V2 (1)               | THFIIPWLERPIIYDVRTRPRTLMSLTGSRDLQMVNITCRVLSRPDERRLRDIYRHLGKD | 84  |
|                      | *****                                                        |     |
|                      |                                                              |     |
| XP_765715            | YDERVLPSIINEVLKSIVAQYNASQLITQRErvskAVRDQLVNRARDFNILLDDVSLTHL | 180 |
| V1 (22)              | YDERVLPSIINEVLKSIVAQYNASQLITQRErvskAVRDQLVNRARDFNILLDDVSLTHL | 144 |
| V2 (1)               | YDERVLPSIINEVLKSIVAQYNASQLITQRErvskAVRDQLVNRARDFNILLDDVSLTHL | 144 |
|                      | *****                                                        |     |
|                      |                                                              |     |
| XP_765715            | SFSPEYEKAVEAKQVAQQQAERSKYIVLKAQEKKSTIIKAQGESEAARLIGSAIKDNPA  | 240 |
| V1 (22)              | SFSPEYEKAVEAKQVAQQQAERSKYIVLKAQEKKSTIIKAQGESEAARLIGSAIKDNPA  | 204 |
| V2 (1)               | SFSPEYEKAVEAKQVAQQQAERSKYIVLKAQEKKSTIIKAQGDSEAARLIGSAIKDNPA  | 204 |
|                      | *****                                                        |     |
|                      |                                                              |     |
| XP_765715            | FITLRRIETAKEVANILSKSQNKIMLNSNTLLLSTDK                        | 277 |
| V1 (22)              | FITLRRIETAKEVANI-----                                        | 220 |
| V2 (1)               | FITLRRIETAKEVANI-----                                        | 220 |
|                      | *****                                                        |     |

<sup>1</sup> Include X.1 variants.  
Eptiope sequence unknown.

Table S9a: Tp7 nucleotide variant Clustal alignment

|                     |                                                                        |     |
|---------------------|------------------------------------------------------------------------|-----|
| TP02_0244 (genomic) | CATTC <b>ATGGAGGCACTGCAAGCAGGC</b> TCGGACATGTCAATGATCGGACAGTTTGGTGTCTG | 720 |
| XM_759717 (mRNA)    | CATTCATGGAGGCACTGCAAGCAGGC <b>TCGGACATGTCAATGATCGGACAGTTTGGTGTCTG</b>  | 490 |
| V1 (2)              | -----                                                                  | 0   |
| V2 (4) <sup>1</sup> | -----                                                                  | 0   |
| V3 (1)              | -----                                                                  | 0   |
| V4 (1)              | -----                                                                  | 0   |
| V5 (2)              | -----                                                                  | 0   |
| V6 (1)              | -----                                                                  | 0   |
| V7 (7)              | -----                                                                  | 0   |
| V8 (7) <sup>1</sup> | -----                                                                  | 0   |
| V9 (1)              | -----                                                                  | 0   |
|                     |                                                                        |     |
| TP02_0244 (genomic) | GTTTCTACTCAGCATACTGGTCGCAGATAAAGGTGACAGTAGTGTCCAAGAACAACGCAG           | 780 |
| XM_759717 (mRNA)    | GTTTCTACTCAGCATACTGGTCGCAGATAAAGGTGACAGTAGTGTCCAAGAACAACGCAG           | 550 |
| V1 (2)              | -----ACCTGGTCGCAGATAAAGGTGACAGTAGTGTCCAAGAACAACGCAG                    | 45  |
| V2 (4)              | -----GCAGATAAAGGTGACAGTAGTGTCCAAGAACAACGCAG                            | 37  |
| V3 (1)              | -----GCAGATAAAGGTGACAGTAGTGTCCAAGAACAACGCAG                            | 37  |
| V4 (1)              | -----GCAG                                                              | 4   |
| V5 (2)              | -----GCAGATAAAGGTGACAGTAGTGTCCAAGAACAACGCAG                            | 37  |
| V6 (1)              | -----GCAGATAAAGGTGACAGTAGTGTCCAAGAACAACGCAG                            | 37  |
| V7 (7)              | -----GCAGATAAAGGTGACAGTAGTGTCCAAGAACAACGCAG                            | 37  |
| V8 (7)              | -----GCAGATAAAGGTGACAGTAGTGTCCAAGAACAACGCAG                            | 37  |
| V9 (1)              | -----GCAGATAAAGGTGACAGTAGTTTCCAAGAACAATGCAG                            | 37  |
|                     | ****                                                                   |     |
|                     |                                                                        |     |
| TP02_0244 (genomic) | ACGACCAGTACGTCTGGGAGTCAACAGCCTCAGGCCACTTTACAGTGAAGAAGGACGACT           | 840 |
| XM_759717 (mRNA)    | ACGACCAGTACGTCTGGGAGTCAACAGCCTCAGGCCACTTTACAGTGAAGAAGGACGACT           | 610 |
| V1 (2)              | ACGACCAGTACGTCTGGGAGTCAACAGCCTCAGGCCACTTTACAGTGAAGAAGGACGACT           | 105 |
| V2 (4)              | ACGACCAGTACGTCTGGGAGTCAACAGCCTCAGGCCACTTTACAGTGAAGAAGGACGACT           | 97  |
| V3 (1)              | ACGACCAGTACGTCTGGGAGTCAACAGCCTCAGGCCACTTTACAGTGAAGAAGGACGACT           | 97  |
| V4 (1)              | ACGACCAGTACGTCTGGGAGTCAACAGCCTCAGGCCACTTTACAGTGAAGAAGGACGACT           | 64  |
| V5 (2)              | ACGACCAGTACGTCTGGGAGTCAACAGCCTCAGGCCACTTTACAGTGAAGAAGGACGACT           | 97  |
| V6 (1)              | ACGACCAGTACGTCTGGGAGTCAACAGCCTCAGGCCACTTTACAGTGAAGAAGGACGACT           | 97  |
| V7 (7)              | ACGACCAGTACGTCTGGGAGTCAACAGCCTCAGGCCACTTTACAGTGAAGAAGGACGACT           | 97  |
| V8 (7)              | ACGACCAGTACGTCTGGGAGTCAACAGCCTCAGGCCACTTTACAGTGAAGAAGGACGACT           | 97  |
| V9 (1)              | ATGACCAGTACGTCTGGGAGTCAACAGCCTCAGGTCACTTTACAGTGAAGAAGGACGACT           | 97  |

\* \*\*\*\*\*

|                     |                                                               |     |
|---------------------|---------------------------------------------------------------|-----|
| TP02_0244 (genomic) | CGCACGAGCCGCTCAAAAGAGGAACTAGACTAATACTGCACTTGAAGGAGGACCAAACCTG | 900 |
| XM_759717 (mRNA)    | CGCACGAGCCGCTCAAAAGAGGAACTAGACTAATACTGCACTTGAAGGAGGACCAAACCTG | 670 |
| V1 (2)              | CGCACGAGCCGCTCAAAAGAGGAACTAGACTAATACTGCACTTGAAGGAGGACCAAACCTG | 165 |
| V2 (4)              | CGCACGAGCCGCTCAAAAGAGGAACTAGACTAATACTGCACTTGAAGGAGGACCAAACCTG | 157 |
| V3 (1)              | CGCACGAGCCGCTCAAAAGAGGAACTAGACTAATACTGCACTTGAAGGAGGACCAAACCTG | 157 |
| V4 (1)              | CGCACGAGCCGCTCAAAAGAGGAACTAGACTAATACTGCACTTGAAGGAGGACCAAACCTG | 124 |
| V5 (2)              | CGCACGAGCCGCTCAAAAGAGGAACTAGACTAATACTGCACTTGAAGGAGGACCAAACCTG | 157 |
| V6 (1)              | CGCACGAGCCGCTCAAAAGAGGAACTAGACTAATACTGCACTTGAAGGAGGACCAAACCTG | 157 |
| V7 (7)              | CGCACGAGCCGCTCAAAAGAGGAACTAGACTAATACTGCACTTGAAGGAGGACCAAACCTG | 157 |
| V8 (7)              | CGCACGAGCCGCTCAAAAGAGGAACTAGACTAATACTGCACTTGAAGGAGGACCAAACCTG | 157 |
| V9 (1)              | CACACGAACCCCTCAAAAGAGGAACTAGACTAATACTGCACTTGAAGGAGGAYCAGTCTG  | 157 |

\* \*\*\*\*\*

|                     |                                                               |     |
|---------------------|---------------------------------------------------------------|-----|
| TP02_0244 (genomic) | AGTACCTTGAGGAGAGAAGGCTGAAAGAGCTTGTTAAGAAGCACAGCGAGTTCATTTTCAT | 960 |
| XM_759717 (mRNA)    | AGTACCTTGAGGAGAGAAGGCTGAAAGAGCTTGTTAAGAAGCACAGCGAGTTCATTTTCAT | 730 |
| V1 (2)              | AGTACCTTGAGGAGAGAAGGCTGAAAGAGCTTGTTAAGAAGCACAGCGAGTTCATTTTCAT | 225 |
| V2 (4)              | AGTACCTTGAGGAGAGAAGACTGAAAGAGCTTGTTAAGAAGCACAGCGAGTTCATTTTCAT | 217 |
| V3 (1)              | AGTACCTTGAGGAGAGAAGGCTGAAAGAGCTTGTTAAGAAGCACAGCGAGTTCATTTTCAT | 217 |
| V4 (1)              | AGTACCTTGAGGAGAGAAGGCTGAAAGAGCTTGTTAAGAAGCACAGCGAGTTCATTTTCAT | 184 |
| V5 (2)              | AGTACCTTGAGGAGAGAAGGCTGAAAGAGCTTGTTAAGAAGCACAGCGAGTTCATTTTCAT | 217 |
| V6 (1)              | AGTACCTTGAGGAGAGAAGGCTGAAAGAGCTTGTTAAGAAGCACAGCGAGTTCATTTTCAT | 217 |
| V7 (7)              | AGTACCTTGAGGAGAGAAGGCTGAAAGAGCTTGTTAAGAAGCACAGCGAGTTCATTTTCAT | 217 |
| V8 (7)              | AGTACCTTGAGGAGAGAAGGCTGAAAGAGCTTGTTAAGAAGCACAGCGAGTTCATTTTCAT | 217 |
| V9 (1)              | AGTACCTTGAGGAGAGAAGGTTGAAGGAACTTGTYAAGAAACACAGCGAGTTCATTTTCRT | 217 |

\*\*\*\*\*

|                     |                                                              |      |
|---------------------|--------------------------------------------------------------|------|
| TP02_0244 (genomic) | TCCCAATCTCGCTCTCAGTAGAGAAGACCCAGGAGACCGAGGTCCTGACGACGAGGCAG  | 1020 |
| XM_759717 (mRNA)    | TCCCAATCTCGCTCTCAGTAGAGAAGACCCAGGAGACCGAGGTCCTGACGACGAGGCAG  | 790  |
| V1 (2)              | TCCCAATCTCGCTCTCAGTAGAGAAGACCCAGGAGACCGAGGTCCTGACGACGAGGCAG  | 285  |
| V2 (4)              | TCCCAATCTCGCTCTCGGTAGAGAAGACTCAGGAGACCGAGGTCCTGACGACGAGGCAG  | 277  |
| V3 (1)              | TCCCAATCTCGCTCTCGGTAGAGAAGACCCAGGAGACCGAGGTTACTGACGACGAGGCAG | 277  |
| V4 (1)              | TCCCAATCTCGCTCTCAGTAGAGAAGACCCAGGAGACCGAGGTCCTGACGACGAGGCAG  | 244  |
| V5 (2)              | TCCCAATCTCACTCTCGGTAGAGAAGACTCAGGAGACCGAGGTCCTGACGACGAGGCAG  | 277  |
| V6 (1)              | TCCCAATCTCGCTCTCAGTAGAGAAGACTCAGGAGACCGAGGTCCTGACGACGAGGCAG  | 277  |
| V7 (7)              | TCCCAATCTCGCTCTCAGTAGAGAAGACCCAGGAGACCGAGGTCCTGACGACGAGGCAG  | 277  |
| V8 (7)              | TCCCAATCTCGCTCTCGGTAGAGAAGACTCAGGAGACCGAGGTCCTGACGACGAGGCAG  | 277  |
| V9 (1)              | TCCCAATCTCACTCTCAGTAGAGAAGACTCAAGAGACCGAAGTTACTGACGATGAGGCCG | 277  |

\*\*\*\*\*

|                     |                                                                                     |      |
|---------------------|-------------------------------------------------------------------------------------|------|
| TP02_0244 (genomic) | AGCTAGACGAGGACAAGAAGCCCGAGGAGGAGAAGCCCAAGGACGATAAGGTGGAGGACG                        | 1080 |
| XM_759717 (mRNA)    | AGCTAGACGAGGACAAGAAGCCCGAGGAGGAGAAGCCCAAGGACGATAAGGTGGAGGACG                        | 850  |
| V1 (2)              | AGCTAGACGAGGACAAGAAGCCCGAGGAGGAGAAGCCCAAGGACGATAAGGTGGAGGACG                        | 345  |
| V2 (4)              | AGCTAGACGAGGACAAGAAGCCCGAGGAGGAAAAGGCCAAGGACGATAAGGTGGA-----                        | 332  |
| V3 (1)              | AGCTAGACGAGGACAAGAAGCCCGAGGAGGAAAAGGCCAAGGACGATAAGGTGGA-----                        | 332  |
| V4 (1)              | AGCTAGACGAGGACAAGAAGCCCGAGGAGGAAAAGGCCAAGGACGATAAGGTGGA-----                        | 299  |
| V5 (2)              | AGCTAGACGAGGACAAGAAGCCCGAGGAGGAAAAGGCCAAGGACGATAAGGTGGA-----                        | 332  |
| V6 (1)              | AGCTAGACGAGGACAAGAAGCCCGAGGAGGAAAAGGCCAAGGACGATAAGGTGGA-----                        | 332  |
| V7 (7)              | AGCTAGACGAGGACAAGAAGCCCGAGGAGGAAAAGGCCAAGGACGATAAGGTGGA-----                        | 332  |
| V8 (7)              | AGCTAGACGAGGACAAGAAGCCCGAGGAGGAAAAGGCCAAGGACGATAAGGTGGA-----                        | 332  |
| V9 (1)              | ACCTAGATGAGGATAAGAAAACCTGAGGAAGAAAAGGACAAGGACCATAAGGTGGA-----                       | 332  |
|                     | * * * * *                                                                           |      |
| TP02_0244 (genomic) | TTACTGACGAGAAAGTGACCGAC <b><u><i>GTCACTGACGAGGAGGAGAAAAAG</i></u></b> GAGGAAAAGAAAA | 1140 |
| XM_759717 (mRNA)    | TTACTGACGAGAAAGTGACCGACGTCACTGACGAGGAGGAGAAAAAGGAGGAAAAGAAAA                        | 910  |
| V1 (2)              | TTACTGACGAGA-----                                                                   | 357  |
| V2 (4)              | -----                                                                               | 332  |
| V3 (1)              | -----                                                                               | 332  |
| V4 (1)              | -----                                                                               | 299  |
| V5 (2)              | -----                                                                               | 332  |
| V6 (1)              | -----                                                                               | 332  |
| V7 (7)              | -----                                                                               | 332  |
| V8 (7)              | -----                                                                               | 332  |
| V9 (1)              | -----                                                                               | 332  |

Primer regions are in bold, underlined and italicized text.

<sup>1</sup> Include X.1 variants.



**Table S9b: Tp7 protein variant Clustal alignment**

|           |                                                               |     |
|-----------|---------------------------------------------------------------|-----|
| XP_764810 | MSMIGQFGVGFYSAYLVADKVTVVSKNNADDQYVWESTASGHFTVKKDDSHPEPLKRGTRL | 180 |
| V1 (3)    | -----ADKVTVVSKNNADDQYVWESTASGHFTVKKDDSHPEPLKRGTRL             | 43  |
| V2 (21)   | -----ADKVTVVSKNNADDQYVWESTASGHFTVKKDDSHPEPLKRGTRL             | 43  |
| V3 (1)    | -----ADKVTVVSKNNADDQYVWESTASGHFTVKKDDSHPEPLKRGTRL             | 43  |
|           | *****                                                         |     |
|           |                                                               |     |
| XP_764810 | ILHLKEDQTEYLEERRLKELVKKHSEFISFPISLSVEKTQETEVTDDAELEDEDKKPEEE  | 240 |
| V1 (3)    | ILHLKEDQTEYLEERRLKELVKKHSEFISFPISLSVEKTQETEVTDDAELEDEDKKPEEE  | 103 |
| V2 (21)   | ILHLKEDQTEYLEERRLKELVKKHSEFISFPISLSVEKTQETEVTDDAELEDEDKKPEEE  | 103 |
| V3 (1)    | ILHLKEDQSEYLEERRLKELVKKHSEFISFPISLSVEKTQETEVTDDAELEDEDKKPEEE  | 103 |
|           | *****:*****:*****                                             |     |
|           |                                                               |     |
| XP_764810 | KPKDDKVEDVTDEKVTDVTDEEEKKEEKKKKRVTNVTREWEMLNKQKPIWMRLPSEVT    | 300 |
| V1 (3)    | KPKDDKV-----                                                  | 110 |
| V2 (21)   | KAKDDKV-----                                                  | 110 |
| V3 (1)    | KDKDHKV-----                                                  | 110 |
|           | * ** . **                                                     |     |

Eptiope region highlighted in grey.

Table S10a: Tp8 nucleotide variant Clustal alignment

|                      |                                                                  |     |
|----------------------|------------------------------------------------------------------|-----|
| TP02_0140 (genomic)  | <u>ATGCTTGGAAATCATGTCATGGGA</u> TCTAATTCACATTAATAATTTTATCATCTGTT | 60  |
| XM_759616 (mRNA)     | ATGCTTGGAAATCATGTCATGGGATCTAATTCACATTAATAATTTTATCATCTGTT         | 60  |
| V1 (3)               | -----                                                            | 0   |
| V2 (2)               | -----                                                            | 0   |
| V3 (1)               | -----                                                            | 0   |
| V4 (1)               | -----                                                            | 0   |
| V5 (1)               | -----                                                            | 0   |
| V6 (3)               | -----                                                            | 0   |
| V7 (1)               | -----                                                            | 0   |
| V8 (1)               | -----                                                            | 0   |
| V9 (1)               | -----                                                            | 0   |
| V10 (2) <sup>1</sup> | -----                                                            | 0   |
| V11 (5) <sup>1</sup> | -----                                                            | 0   |
| V12 (2)              | -----                                                            | 0   |
|                      |                                                                  |     |
| TP02_0140 (genomic)  | ACATTCTTACATATTGCTAAAATGGAAGAAGTAGAAAACGTA AAAAGTCGACGCCTTGGAG   | 120 |
| XM_759616 (mRNA)     | ACATTCTTACATATTGCTAAAATGGAAGAAGTAGAAAACGTA AAAAGTCGACGCCTTGGAG   | 120 |
| V1 (3)               | -----GTCGACGCCTTGGAG                                             | 15  |
| V2 (2)               | -----GTCGACGCCTTGGAG                                             | 15  |
| V3 (1)               | -----GTCGACGCCTTGGAG                                             | 15  |
| V4 (1)               | -----GTCGACGCCTTGGAG                                             | 15  |
| V5 (1)               | -----GTCGACGCCTTGGAG                                             | 15  |
| V6 (3)               | -----GTCGACGCCTTGGAG                                             | 15  |
| V7 (1)               | -----GTCGACGCCTTGGAG                                             | 15  |
| V8 (1)               | -----GTCGACGCCTTGGAG                                             | 15  |
| V9 (1)               | -----GTCGACGCCTTGGAG                                             | 15  |
| V10 (2)              | -----GTCGACGCCTTGGAG                                             | 15  |
| V11 (5)              | -----GTCGACGCCTTGGAG                                             | 15  |
| V12 (2)              | -----GTCGACGCCTTGGAG                                             | 15  |
|                      | *****                                                            |     |
|                      |                                                                  |     |
| TP02_0140 (genomic)  | CGTGTTGACACTGAGTCTGTCCTTAATTATGACACTGTGTTAGAAAAGAAACCATTGCGC     | 180 |
| XM_759616 (mRNA)     | CGTGTTGACACTGAGTCTGTCCTTAATTATGACACTGTGTTAGAAAAGAAACCATTGCGC     | 180 |
| V1 (3)               | CGTGTTGACACTGAGTCTGTCCTTAATTATGACACTGTGTTAGAAAAGAAACCATTGCGC     | 75  |
| V2 (2)               | CGTGTTGACACTGAGTCTGTCCTTAATTATGACACTGTGTTAGAAAAGAAACCATTGCGC     | 75  |
| V3 (1)               | CGTGTTGACACTGAGTCTGTCCTTAATTATGACACTGTGTTAGAAAAGAAACCATTGCGC     | 75  |

|         |                                                              |    |
|---------|--------------------------------------------------------------|----|
| V4 (1)  | CGTGTTGACACTGAGTCTGTCCTTAATTATGACACTGTGTTAGAAAAGAAACCATTGCGC | 75 |
| V5 (1)  | CGTGTTGACACTGAGTCTGTCCTTAATTATGACACTGTGTTAGAAAAGAAACCATTGCGC | 75 |
| V6 (3)  | CGTGTTGACACTGAGTCTGTCCTTAATTATGACACTGTGTTAGAAAAGAAACCATTGCGC | 75 |
| V7 (1)  | CGTGTTGACACTGAGTCTGTCCTTAATTATGACACTGTGTTAGAAAAGAAACCATTGCGC | 75 |
| V8 (1)  | CGTGTTGACACTGAGTCTGTCCTTAATTATGACACTGTGTTAGAAAAGAAACCATTGCGC | 75 |
| V9 (1)  | CGTGTTGACACTGAGTCTGTCCTTAATTATGACACTGTGTTAGAAAAGAAACCATTGCGC | 75 |
| V10 (2) | CGTGTTGACACTGAGTCTGTCCTTAATTATGACACTGTGTTAGAAAAGAAACCATTGCGC | 75 |
| V11 (5) | CGTGTTGACACTGAGTCTGTCCTTAATTATGACACTGTGTTAGAAAAGAAACCATTGCGC | 75 |
| V12 (2) | CGTGTTGACACTGAGTCTGTCCTTAATTATGACACTGTGTTAGAAAAGAAACCATTGCGC | 75 |

\*\*\*\*\*

|                     |                                                              |     |
|---------------------|--------------------------------------------------------------|-----|
| TP02_0140 (genomic) | AGCAGTGTTGCCTCTTTCTTCAAAGATAACAGTGCTGTTCTCGTAATATTAAGTCCGCGT | 240 |
| XM_759616 (mRNA)    | AGCAGTGTTGCCTCTTTCTTCAAAGATAACAGTGCTGTTCTCGTAATATTAAGTCCGCGT | 240 |
| V1 (3)              | AGCAGTGTTGCCTCTTTCTTCAAAGATAACAGTGCTGTTCTCGTAATATTAAGTCCGCGT | 135 |
| V2 (2)              | AGCAGTGTTGCCTCTTTCTTCAAAGATAACAGTGCTGTTCTCGTAATATTAAGTCCGCGT | 135 |
| V3 (1)              | AGCAGTGTTGCCTCTTTCTTCAAAGATAACAGTGCTGTTCTCGTAATATTAAGTCCGCGT | 135 |
| V4 (1)              | AGCAGTGTTGCCTCTTTCTTCAAAGATAACAGTGCTGTTCTCGTAATATTAAGTCCGCGT | 135 |
| V5 (1)              | AGCAGTGTTGCCTCTTTCTTCAAAGATAACAGTGCTGTTCTCGTAATATTAAGTCCGCGT | 135 |
| V6 (3)              | AGCAGTGTTGCCTCTTTCTTCAAAGATAACAGTGCTGTTCTCGTAATATTAAGTCCGCGT | 135 |
| V7 (1)              | AGCAGTGTTGCCTCTTTCTTCAAAGATAACAGTGCTGTTCTCGTAATATTAAGTCCGCGT | 135 |
| V8 (1)              | AGCAGTGTTGCCTCTTTCTTCAAAGATAACAGTGCTGTTCTCGTAATATTAAGTCCGCGT | 135 |
| V9 (1)              | AGCAGTGTTGCCTCTTTCTTCAAAGATAACAGTGCTGTTCTCGTAATATTAAGTCCGCGT | 135 |
| V10 (2)             | AGCAGTGTTGCCTCTTTCTTCAAAGATAACAGTGCTGTTCTCGTAATATTAAGTCCGCGT | 135 |
| V11 (5)             | AGCAGTGTTGCCTCTTTCTTCAAAGATAACAGTGCTGTTCTCGTAATATTAAGTCCGCGT | 135 |
| V12 (2)             | AGCAGTGTTGCCTCTTTCTTCAAAGATAACAGTGCTGTTCTCGTAATATTAAGTCCGCGT | 135 |

\*\*\*\*\*

|                     |                                                               |     |
|---------------------|---------------------------------------------------------------|-----|
| TP02_0140 (genomic) | CTATTATTCACATTCACCTTTTGCAGCAATAGCATTGTCATCAGGCAGAAGCGCAATCAGA | 300 |
| XM_759616 (mRNA)    | CTATTATTCACATTCACCTTTTGCAGCAATAGCATTGTCATCAGGCAGAAGCGCAATCAGA | 300 |
| V1 (3)              | CTATTATTCACATTCACCTTTTGCAGCAATAGCATTGTCATCAGGCAGAAGCGCAATCAGA | 195 |
| V2 (2)              | CTATTATTCACATTCACCTTTTGCAGCAATAGCATTGTCATCAGGCAGAAGCGCAATCAGA | 195 |
| V3 (1)              | CTATTATTCACATTCACCTTTTGCAGCAATAGCATTGTCATCAGGCAGAAGCGCAATCAGA | 195 |
| V4 (1)              | CTATTATTCACATTCACCTTTTGCAGCAATAGCATTGTCATCAGGCAGAAGCGCAATCAGA | 195 |
| V5 (1)              | CTATTATTCACATTCACCTTTTGCAGCAATAGCATTGTCATCAGGCAGAAGCGCAATCAGA | 195 |
| V6 (3)              | CTATTATTCACATTCACCTTTTGCAGCAATAGCATTGTCATCAGGCAGAAGCGCAATCAGA | 195 |
| V7 (1)              | CTATTATTCACATTCACCTTTTGCAGCAATAGCATTGTCATCAGGCAGAAGCGCAATCAGA | 195 |
| V8 (1)              | CTATTATTCACATTCACCTTTTGCAGCAATAGCATTGTCATCAGGCAGAAGCGCAATCAGA | 195 |
| V9 (1)              | CTATTATTCACATTCACCTTTTGCAGCAATAGCATTGTCATCAGGCAGAAGCGCAATCAGA | 195 |
| V10 (2)             | CTATTATTCACATTCACCTTTTGCAGCAATAGCATTGTCATCAGGCAGAAGCGCAATCAGA | 195 |
| V11 (5)             | CTATTATTCACATTCACCTTTTGCAGCAATAGCATTGTCATCAGGCAGAAGCGCAATCAGA | 195 |
| V12 (2)             | CTATTATTCACATTCACCTTTTGCAGCAATAGCATTGTCATCAGGCAGAAGCGCAATCAGA | 195 |

```

*****
TP02_0140 (genomic)      AAGAACAGAGAACTCCTGTCAGTCGAATTTGAAAAGCTTCAGTTCGATAATTTTCGTGACA      360
XM_759616 (mRNA)        AAGAACAGAGAACTCCTGTCAGTCGAATTTGAAAAGCTTCAGTTCGATAATTTTCGTGACA      360
V1 (3)                   AAGAACAGAGAACTCCTGTCAGTCGAATTTGAAAAGCTTCAGTTCGATAATTTTCGTGACA      255
V2 (2)                   AAGAACAGAGAACTCCTGTCAGTCGAATTTGAAAAGCTTCAGTTCGATAATTACGTGACA      255
V3 (1)                   AAGAACAGAGAACTCCTGTCAGTCGAATTTGAAAAGCTTCAGTTCGATAATTTTCGTGACA      255
V4 (1)                   AAGAACAGAGAACTCCTGTCAGTCGAATTTGAAAAGCTTCAGTTCGATAATTTTCGTGACA      255
V5 (1)                   AAGAACAGAGAACTCCTGTCAGTCGAATTTGAAAAGCTTCAGTTCGATAATTTTCGTGACA      255
V6 (3)                   AAGAACAGAGAACTCCTGTCAGTCGAATTTGAAAAGCTTCAGTTCGATAATTTTCGTGACA      255
V7 (1)                   AAGAACAGAGAACTCCTGTCAGTCGAATTTGAAAAGCTTCAGTTCGATAATTTTCGTGACA      255
V8 (1)                   AAGAACAGAGAACTCCTGTCAGTCGAATTTGAAAAGCTTCAGTTCGATAATTTTCGTGACA      255
V9 (1)                   AAGAACAGAGAACTCCTGTCAGTCGAATTTGAAAAGCTTCAGTTCGATAATTTTCGTGACA      255
V10 (2)                  AAGAACAGAGAACTCCTGTCAGTCGAATTTGAAAAGCTTCAGTTCGATAATTTTCGTGACA      255
V11 (5)                  AAGAACAGAGAACTCCTGTCAGTCGAATTTGAAAAGCTTCAGTTCGATAATTTTCGTGACA      255
V12 (2)                  AAGAACAGAGAACTCCTGTCAGTCGAATTTGAAAAGCTTCAGTTCGATAATTTTCGTGACA      255
*****

TP02_0140 (genomic)      ATTAAGGGAGAAAGGGAAGAGGACTTCCCCAAGATGGTAGCTGAAGTTCTTTACAAGGTT      420
XM_759616 (mRNA)        ATTAAGGGAGAAAGGGAAGAGGACTTCCCCAAGATGGTAGCTGAAGTTCTTTACAAGGTT      420
V1 (3)                   ATTAAGGGAGAAAGGGAAGAGGACTTCCCCAAGATGGTAGCTGAAGTTCTTTACAAGGTT      315
V2 (2)                   ATTAAGGGAGAAAGGGAAGAGGACTTCCCCAAGATGGTAGCTGAAGTTCTTTACAAAGTT      315
V3 (1)                   ATTAAGGGAGAAAGGGAAGAGGACTTCCCCAAGATGGTAGCTGAAGTTCTTTACAAAGTT      315
V4 (1)                   ATTAAGGGAGAAAGGGAAGAGGACTTCCCCAAGATGGTAGCTGAAGTTCTTTACAAAGTT      315
V5 (1)                   ATTAAGGGAGAAAGGGAAGAGGACTTCCCCAAGATGGTAGCTGAAGTTCTTTACAAAGTT      315
V6 (3)                   ATTAAGGGAGAAAGGGAAGAGGACTTCCCCAAGATGGTAGCTGAAGTTCTTTACAAAGTT      315
V7 (1)                   ATTAAGGGAGAAAGGGAAGAGGACTTCCCCAAGATGGTAGCTGAAGTTCTTTACAAAGTT      315
V8 (1)                   ATTAAGGGAGAAAGGGAAGAGGACTTCCCCAAGATGGTAGCTGAAGTTCTTTACAAAGTT      315
V9 (1)                   ATTAAGGGAGAAAGGGAAGAGGACTTCCCCAAGATGGTAGCTGAAGTTCTTTACAAAGTT      315
V10 (2)                  ATTAAGGGAGAAAGGGAAGAGGACTTCCCCAAGATGGTAGCTGAAGTTCTTTACAAAGTT      315
V11 (5)                  ATTAAGGGAGAAAGGGAAGAGGACTTCCCCAAGATGGTAGCTGAAGTTCTTTACAAAGTT      315
V12 (2)                  ATTAAGGGAGAAAGGGAAGAGGACTTCCCCAAGATGGTAGCTGAAGTTCTTTACAAGGTT      315
*****

TP02_0140 (genomic)      GCAGTCGAGTTTGACCCAAAAGAAGAGGCCTTGATCTACGTCCAGTTCAATGACTTCAAC      480
XM_759616 (mRNA)        GCAGTCGAGTTTGACCCAAAAGAAGAGGCCTTGATCTACGTCCAGTTCAATGACTTCAAC      480
V1 (3)                   GCAGTCGAGTTTGACCCAAAAGAAGAGGCCTTGATCTACGTCCAGTTCAATGACTTCAAC      375
V2 (2)                   GCAGTCGAGTTTGACCCAAAAGAAGAGGCCTTGATCTACGTCCAGTTCAATGACTTTAAC      375
V3 (1)                   GCAGTCGAGTTTGACCCAAAAGAAGAGGCCTTGATCTACGTCCAGTTCAATGACTTTAAC      375
V4 (1)                   GCAGTCGAGTTTGACCCAAAAGAAGAGGCCTTGATCTACGTCCAGTTCAATGACTTCAAC      375
V5 (1)                   GCAGTCGAGTTTGACCCAAAAGAAGAGGCCTTGATCTACGTCCAGTTCAATGACTTCAAC      375

```

|         |              |                                                  |     |
|---------|--------------|--------------------------------------------------|-----|
| V6 (3)  | GCAGTCGAGTTT | GACCCAAAAGAAGAGGCCTTGATCTACGTCCAGTTCAATGACTTCAAC | 375 |
| V7 (1)  | GCAGTCGAGTTT | GACCCAAAAGAAGAGGCCTTGATCTACGTCCAGTTCAATGACTTCAAC | 375 |
| V8 (1)  | GCAGTCGAGTTT | GACCCAAAAGAAGAGGCCTTGATCTACGTCCAGTTCAATGACTTCAAC | 375 |
| V9 (1)  | GCAGTCGAGTTT | GACCCAAAAGAAGAGGCCTTGATCTACGTCCAGTTCAATGACTTCAAC | 375 |
| V10 (2) | GCAGTCGAGTTT | GACCCAAAAGAAGAGGCCTTGATCTACGTCCAGTTCAATGACTTCAAC | 375 |
| V11 (5) | GCAGTCGAGTTT | GACCCAAAAGAAGAGGCCTTGATCTACGTCCAGTTCAATGACTTCAAC | 375 |
| V12 (2) | GCAGTCGAGTTT | GACCCAAAAGAAGAGGCCTTGATCTACGTCCAGTTCAATGACTTCAAC | 375 |
|         |              | *****                                            |     |

|                     |                                                              |       |  |
|---------------------|--------------------------------------------------------------|-------|--|
| TP02_0140 (genomic) | AAGCAACACGACAAGAAGCACAACAATTACAGGCACAAGAAGACCTCGTACACCAACTTC | 540   |  |
| XM_759616 (mRNA)    | AAGCAACACGACAAGAAGCACAACAATTACAGGCACAAGAAGACCTCGTACACCAACTTC | 540   |  |
| V1 (3)              | AAGCAACACGACAAGAAGCACAACAATTACAGGCACAAGAAGACCTCGTACACCAACTTC | 435   |  |
| V2 (2)              | AAGCAACACGACAAGAAGCACAACAATTACAGGCACAAGAAGACCTCGTACACCAACTTC | 435   |  |
| V3 (1)              | AAGCAACACGACAAGAAGCACAACAATTACAGGCACAAGAAGACCTCGTACACCAACTTC | 435   |  |
| V4 (1)              | AAGCAACACGACAAGAAGCACAACAATTACAGGCACAAGAAGACCTCGTACACCAACTTC | 435   |  |
| V5 (1)              | AAGCAACACGACAAGAAGCACAACAATTACAGGCACAAGAAGACCTCGTACACCAACTTC | 435   |  |
| V6 (3)              | AAGCAACACGACAAGAAGCACAACAATTACAGGCACAAGAAGACCTCGTACACCAACTTC | 435   |  |
| V7 (1)              | AAGCAACACGACAAGAAGCACAACAATTACAGGCACAAGAAGACCTCGTACACCAACTTC | 435   |  |
| V8 (1)              | AAGCAACACGACAAGAAGCACAACAATTACAGGCACAAGAAGACCTCGTACACCAACTTC | 435   |  |
| V9 (1)              | AAGCAACACGACAAGAAGCACAACAATTACAGGCACAAGAAGACCTCGTACACCAACTTC | 435   |  |
| V10 (2)             | AAGCAACACGACAAGAAGCACAACAATTACAGGCACAAGAAGACCTCGTACACCAACTTC | 435   |  |
| V11 (5)             | AAGCAACACGACAAGAAGCACAACAATTACAGGCACAAGAAGACCTCGTACACCAACTTC | 435   |  |
| V12 (2)             | AAGCAACACGACAAGAAGCACAACAATTACAGGCACAAGAAGACCTCGTACACCAACTTC | 435   |  |
|                     |                                                              | ***** |  |

|                     |                                                              |       |  |
|---------------------|--------------------------------------------------------------|-------|--|
| TP02_0140 (genomic) | AGAAACAACCTTAATGATATAAACGAGCACAACGCAAAACCAAACCTGTCGTACACCAAG | 600   |  |
| XM_759616 (mRNA)    | AGAAACAACCTTAATGATATAAACGAGCACAACGCAAAACCAAACCTGTCGTACACCAAG | 600   |  |
| V1 (3)              | AGAAACAACCTTAATGATATAAACGAGCACAACGCAAAACCAAACCTGTCGTACACCAAG | 495   |  |
| V2 (2)              | AGAAACAACCTTAATGATATAAACGAGCACAACGCAAAACCAAACCTGTCGTACACCAAG | 495   |  |
| V3 (1)              | AGAGACAACCTTAATGATATAAACGAGCACAACGCAAAACCAAACCTGTCCTACACCAAG | 495   |  |
| V4 (1)              | AGAAACAACCTTAATGATATAAACGAGCACAACGCAAAACCAAACCTGTCGTACACCAAG | 495   |  |
| V5 (1)              | AGAAACAACCTTAATGATATAAACGAGCACAACGCAAAACCAAACCTGTCGTACACCAAG | 495   |  |
| V6 (3)              | AGAAACAACCTTAATGATATAAACGAGCACAACGCAAAACCAAACCTGTCGTACACCAAG | 495   |  |
| V7 (1)              | AGAAACAACCTTAATGATATAAACGAGCACAACGCAAAACCAAACCTGTCGTACACCAAG | 495   |  |
| V8 (1)              | AGAAACAACCTTAATGATATAAACGAGCACAACGCAAAACCAAACCTGTCGTACACCAAG | 495   |  |
| V9 (1)              | AGAAACAACCTTAATGATATAAACGAGCACAACGCAAAACCAAACCTGTCGTACACCAAG | 495   |  |
| V10 (2)             | AGAAACAACCTTAATGATATAAACGAGCACAACGCAAAACCAAACCTGTCGTACACCAAG | 495   |  |
| V11 (5)             | AGAAACAACCTTAATGATATAAACGAGCACAACGCAAAACCAAACCTGTCGTACACCAAG | 495   |  |
| V12 (2)             | AGAAACAACCTTAATGATATAAACGAGCACAACGCAAAACCAAACCTGTCGTACACCAAG | 495   |  |
|                     | ***                                                          | ***** |  |

|                     |                                                                |     |
|---------------------|----------------------------------------------------------------|-----|
| TP02_0140 (genomic) | AACATGAACCACTTCGGTGACATATCATCCAAGGATTTTCATGAAGAGATACACCAAGAAA  | 660 |
| XM_759616 (mRNA)    | AACATGAACCACTTCGGTGACATATCATCCAAGGATTTTCATGAAGAGATACACCAAGAAA  | 660 |
| V1 (3)              | AACATGAACCACTTCGGTGACATATCATCCAAGGATTTTCATGAAGAGATACACCAAGAAA  | 555 |
| V2 (2)              | AGCATGAACCACTTCGGTGACATATCATCCAAGGATTTTCATGAAGAGATACACCAAGAAA  | 555 |
| V3 (1)              | AGCATGAACCACTTCGGTGACATATCATCCAAGGATTTTCATGAAGAGATACACCAAGAAA  | 555 |
| V4 (1)              | AGCATGAACCACTTCGGTGACATATCATCCAAGGATTTTCATGAAGAGATACACCAAGAAA  | 555 |
| V5 (1)              | AGCATGAACCACTTCGGTGACATATCATCCAAGGATTTTCATGAAGAGATACACCAAGAAA  | 555 |
| V6 (3)              | AGCATGAACCACTTCGGTGACATATCATCCAAGGATTTTCATGAAGAGATACACCAAGAAA  | 555 |
| V7 (1)              | AGCATGAACCACTTCGGTGACATATCATCCAAGGATTTTCATGAAGAGATACACCAAGAAA  | 555 |
| V8 (1)              | AGCATGAACCACTTCGGTGACATATCATCCAAGGATTTTCATGAAGAGATACACCAAGAAA  | 555 |
| V9 (1)              | AGCATGAACCACTTCGGTGACATATCATCCAAGGATTTTCATGAAGAGATACACCAAGAAA  | 555 |
| V10 (2)             | AGCATGAACCACTTCGGTGACATATCATCCAAGGATTTTCATGAAGAGATACACCAAGAAA  | 555 |
| V11 (5)             | AGCATGAACCACTTCGGTGACATATCATCCAAGGATTTTCATGAAGAGATACACCAAGAAA  | 555 |
| V12 (2)             | AGCATGAACCACTTCGGTGACATATCATCCAAGGATTTTCATGAAGAGATACACCAAGAAA  | 555 |
|                     | * ****                                                         |     |
| TP02_0140 (genomic) | GTACTCTTGAACCTTGCCAAAAGACCACGTGTCCACCTATAACAACAACAGACCAATGTCA  | 720 |
| XM_759616 (mRNA)    | GTACTCTTGAACCTTGCCAAAAGACCACGTGTCCACCTATAACAACAACAGACCAATGTCA  | 720 |
| V1 (3)              | GTACTCTTGAACCTTGCCAAAAGACCACGTGTCCACCTATAACAACAACAGACCAATGTCA  | 615 |
| V2 (2)              | GTACTCTTGAACCTTGCCAAAAGACCACGCGTCCACCTATAACAACAACAGACCAATGTCA  | 615 |
| V3 (1)              | GTACTCTTGAACCTTGCCAAAAGACCACGTGTCCACCTATAACAACAACAGACCAATGTCA  | 615 |
| V4 (1)              | GTACTCTTGAACCTTGCCAAAAGACCACGCGTCCACCTATAACAACAACAGACCAATGTCA  | 615 |
| V5 (1)              | GTACTCTTGAACCTTGCCAAAAGACCACGTGTCCACCTATAAACAACAACAGACCAATGTCA | 615 |
| V6 (3)              | GTACTCTTGAACCTTGCCAAAAGACCACGTGTCCACCTATAAACAACAACAGACCAATGTCA | 615 |
| V7 (1)              | GTACTCTTGAACCTTGCCAAAAGACCACGTGTCCACCTATAACAACAACAGACCAATGTCA  | 615 |
| V8 (1)              | GTACTCTTGAACCTTGCCAAAAGACCACGTGTCCACCTATAACAACAACAGACCAATGTCA  | 615 |
| V9 (1)              | GTACTCTTGAACCTTGCCAAAAGACCACGTGTCCACCTATAACAACAACAGACCAATGTCA  | 615 |
| V10 (2)             | GTACTCTTGAACCTTGCCAAAAGACCACGTGTCCACCTATAACAACAACAGACCAATGTCA  | 615 |
| V11 (5)             | GTACTCTTGAACCTTGCCAAAAGACCACGTGTCCACCTATAACAACAACAGACCAATGTCA  | 615 |
| V12 (2)             | GTACTCTTGAACCTTGCCAAAAGACCACGTGTCCACCTATAACAACAACAGACCAATGTCA  | 615 |
|                     | *****                                                          |     |
| TP02_0140 (genomic) | GTTGATCTCAGAAGCCATGGTGTATTGACTCCAGTCAAGTGCCAAGAAGAAAATGAACTC   | 780 |
| XM_759616 (mRNA)    | GTTGATCTCAGAAGCCATGGTGTATTGACTCCAGTCAAGTGCCAAGAAGAAAATGAACTC   | 780 |
| V1 (3)              | GTTGATCTCAGAAGCCATGGTGTATTGACTCCAGTCAAGTGCCAAGAAGAAAATGAACTC   | 675 |
| V2 (2)              | GTTGATCTCAGAAGCCATGGTGTATTGACTCCAGTCAAGTGCCAAGAAGAAAATGAACTC   | 675 |
| V3 (1)              | GTTGATCTCAGAAGCCATGGTGTATTGACTCCAGTCAAGTGCCAAGAAGAAAATGAACTC   | 675 |
| V4 (1)              | GTTGATCTCAGAAGCCATGGTGTATTGACTCCAGTCAAGTGCCAAGAAGAAAATGAACTC   | 675 |
| V5 (1)              | GTTGATCTCAGAAGCCATGGTGTATTGACTCCAGTCAAGTGCCAAGAAGAAAATGAACTC   | 675 |
| V6 (3)              | GTTGATCTCAGAAGCCATGGTGTATTGACTCCAGTCAAGTGCCAAGAAGAAAATGAACTC   | 675 |
| V7 (1)              | GTTGATCTCAGAAGCCATGGTGTATTGACTCCAGTCAAGTGCCAAGAAGAAAATGAACTC   | 675 |

|         |                             |     |
|---------|-----------------------------|-----|
| V8 (1)  | GTTGATCTCAGAAGCCATGGTGTATTA | 675 |
| V9 (1)  | GTTGATCTCAGAAGCCATGGTGTATTA | 675 |
| V10 (2) | GTTGATCTCAGAAGCCATGGTGTATTG | 675 |
| V11 (5) | GTTGATCTCAGAAGCCATGGTGTATTG | 675 |
| V12 (2) | GTTGATCTCAGAAGCCATGGTGTATTG | 675 |
|         | *****                       |     |

|                     |                             |     |
|---------------------|-----------------------------|-----|
| TP02_0140 (genomic) | TCATGGCCATACTCCGTAGTAGCAGTC | 840 |
| XM_759616 (mRNA)    | TCATGGCCATACTCCGTAGTAGCAGTC | 840 |
| V1 (3)              | TCATGGCCATACTCCGTAGTAGCAGTC | 735 |
| V2 (2)              | TCATGGCCATACTCCGTAGTAGCAGTC | 735 |
| V3 (1)              | TCATGGCCATACTCCGTAGTAGCAGTC | 735 |
| V4 (1)              | TCATGGCCATACTCCGTAGTAGCAGTC | 735 |
| V5 (1)              | TCATGGCCATACTCCGTAGTAGCAGTC | 735 |
| V6 (3)              | TCATGGCCATACTCCGTAGTAGCAGTC | 735 |
| V7 (1)              | TCATGGCCATACTCCGTAGTAGCAGTC | 735 |
| V8 (1)              | TCATGGCCATACTCCGTAGTAGCAGTC | 735 |
| V9 (1)              | TCATGGCCATACTCCGTAGTAGCAGTC | 735 |
| V10 (2)             | TCATGGCCATACTCCGTAGTAGCAGTC | 735 |
| V11 (5)             | TCATGGCCATACTCCGTAGTAGCAGTC | 735 |
| V12 (2)             | TCATGGCCATACTCCGTAGTAGCAGTC | 735 |
|                     | *****                       |     |

|                     |                              |     |
|---------------------|------------------------------|-----|
| TP02_0140 (genomic) | ACCGTATCCCTCAGCGAAAAACAATTAG | 900 |
| XM_759616 (mRNA)    | ACCGTATCCCTCAGCGAAAAACAATTAG | 900 |
| V1 (3)              | ACCGTATCCCTCAGCGAAAAACAATTAG | 795 |
| V2 (2)              | ACCGTATCCCTCAGCGAAAAACAATTAG | 795 |
| V3 (1)              | ACCGTATCCCTCAGCGAAAAACAATTAG | 795 |
| V4 (1)              | ACCGTATCCCTCAGCGAAAAACAATTAG | 795 |
| V5 (1)              | ACCGTATCCCTCAGCGAAAAACAATTAG | 795 |
| V6 (3)              | ACCGTATCCCTCAGCGAAAAACAATTAG | 795 |
| V7 (1)              | ACCGTATCCCTCAGCGAAAAACAATTAG | 795 |
| V8 (1)              | ACCGTATCCCTCAGCGAAAAACAATTAG | 795 |
| V9 (1)              | ACCGTATCCCTCAGCGAAAAACAATTAG | 795 |
| V10 (2)             | ACCGTATCCCTCAGCGAAAAACAATTAG | 795 |
| V11 (5)             | ACCGTATCCCTCAGCGAAAAACAATTAG | 795 |
| V12 (2)             | ACCGTATCCCTCAGCGAAAAACAATTAG | 795 |
|                     | *****                        |     |

|                     |                              |     |
|---------------------|------------------------------|-----|
| TP02_0140 (genomic) | AACCCATTCTTGGGTTACAAATACCTTA | 960 |
| XM_759616 (mRNA)    | AACCCATTCTTGGGTTACAAATACCTTA | 960 |

|                     |                                                               |      |
|---------------------|---------------------------------------------------------------|------|
| V1 (3)              | AACCCATTCTTGGGTTACAAATACCTTAAGGACTTGGGTCTGTTCGAATCAGAACTCGTA  | 855  |
| V2 (2)              | AACCCATTCTTGGGTTACAAATACCTTAAGGACTTGGGTCTGTTCGAATCAGAACTCGTA  | 855  |
| V3 (1)              | AACCCATTCTTGGGTTACAAATACCTTAAGGACTTGGGTCTGTTCGAATCAGAACTCGTA  | 855  |
| V4 (1)              | AACCCATTCTTGGGTTACAAATACCTTAAGGACTTGGGTCTGTTCGAATCAGAACTCGTA  | 855  |
| V5 (1)              | AACCCATTCTTGGGTTACAAATACCTTAAGGACTTGGGTCTGTTCGAATCAGAACTCGTA  | 855  |
| V6 (3)              | AACCCATTCTTGGGTTACAAATACCTTAAGGACTTGGGTCTGTTCGAATCAGAACTCGTA  | 855  |
| V7 (1)              | AACCCATTCTTGGGTTACAAATACCTTAAGGACTTGGGTCTGTTCGAATCAGAACTCGTA  | 855  |
| V8 (1)              | AACCCATTCTTGGGTTACAAATACCTTAAGGACTTGGGTCTGTTCGAATCAGAACTCGTA  | 855  |
| V9 (1)              | AACCCATTCTTGGGTTACAAATACCTTAAGGACTTGGGTCTGTTCGAATCAGAACTCGTA  | 855  |
| V10 (2)             | AACCCATTCTTGGGTTACAAATACCTTAAGGACTTGGGTCTGTTCGAATCAGAACTCGTA  | 855  |
| V11 (5)             | AACCCATTCTTGGGTTACAAATACCTTAAGGACTTGGGTCTGTTCGAATCAGAACTCGTA  | 855  |
| V12 (2)             | AACCCATTCTTGGGTTACAAATACCTTAAGGACTTGGGTCTGTTCGAATCAGAACTCGTA  | 855  |
|                     | *****                                                         |      |
| TP02_0140 (genomic) | GACAAATCCACAACCAAGTGCCAGCATTGGAAGGTGAAAGATTCAAAGTCCCATCATA    | 1020 |
| XM_759616 (mRNA)    | GACAAATCCACAACCAAGTGCCAGCATTGGAAGGTGAAAGATTCAAAGTCCCATCATA    | 1020 |
| V1 (3)              | GACAAATCCACAACCAAGTGCCAGCATTGGAAGGTGAAAGATTCAAAGTCCCATCATA    | 915  |
| V2 (2)              | GACAAATCCACAACCAAGTGCCAGCATTGGAAGGTGAAAGATTCAAAGTCCCATCATA    | 915  |
| V3 (1)              | GACAAATCCACAACCAAGTGCCAGCATTGGAAGGTGAAAGATTCAAAGTCCCATCATA    | 915  |
| V4 (1)              | GACAAATCCACAACCAAGTGCCAGCATTGGAAGGTGAAAGATTCAAAGTCCCATCATA    | 915  |
| V5 (1)              | GACAAATCCACAACCAAGTGCCAGCATTGGAAGGTGAAAGATTCAAAGTCCCATCATA    | 915  |
| V6 (3)              | GACAAATCCACAACCAAGTGCCAGCATTGGAAGGTGAAAGATTCAAAGTCCCATCATA    | 915  |
| V7 (1)              | GACAAATCCGCAACCAAGTGCCAGCATTGGAAGGTGAAAGATTCAAAGTCCCGTCATA    | 915  |
| V8 (1)              | GACAAATCCGCAACCAAGTGCCAGCATTGGAAGGTGAAAGATTCAAAGTCCCGTCATA    | 915  |
| V9 (1)              | GACAAATCCGCAACCAAGTGCCAGCATTGGAAGGTGAAAGATTCAAAGTCCCATCATA    | 915  |
| V10 (2)             | GACAAATCCGCAACCAAGTGCCAGCATTGGAAGGTGAAAGATTCAAAGTCCCATCATA    | 915  |
| V11 (5)             | GACAAATCCGCAACCAAGTGCCAGCATTGGAAGGTGAAAGATTCAAAGTCCCATCATA    | 915  |
| V12 (2)             | GACAAATCCGCAACCAAGTGCCAGCATTGGAAGGTGAAAGATTCAAAGTCCCATCATA    | 915  |
|                     | *****                                                         |      |
| TP02_0140 (genomic) | TCATACTCATATGAGCCAGATTTGGTGGCACTCTTGTTGAATGCAGGACCACTCACTGTA  | 1080 |
| XM_759616 (mRNA)    | TCATACTCATATGAGCCAGATTTGGTGGCACTCTTGTTGAATGCAGGACCACTCACTGTA  | 1080 |
| V1 (3)              | TCATACTCATATGAGCCAGATTTGGTGGCACTCTTGTTGAATGCAGGACCACTCACTGTA  | 975  |
| V2 (2)              | TCATACTCATATGAGCCAGATTTGGTGGCACTCTTGTTGAATGCAGGACCACTCACTGTA  | 975  |
| V3 (1)              | TCATACTCATATGAGCCCAGATTTGGTGGCACTCTTGTTGAATGCAGGACCACTCACTGTA | 975  |
| V4 (1)              | TCATACTCATATGAGCCAGATTTGGTGGCACTCTTGTTGAATGCAGGACCACTCACTGTA  | 975  |
| V5 (1)              | TCATACTCATATGAGCCCAGATTTGGTGGCACTCTTGTTGAATGCAGGACCACTCACTGTA | 975  |
| V6 (3)              | TCATACTCATATGAGCCCAGATTTGGTGGCACTCTTGTTGAATGCAGGACCACTCACTGTA | 975  |
| V7 (1)              | TCATACTCATATGAGCCAGATTTGGTGGCACTCTTGTTGAATGCAGGACCACTCACTGTA  | 975  |
| V8 (1)              | TCATACTCATATGAGCCAGATTTGGTGGCACTCTTGTTGAATGCAGGACCACTCACTGTA  | 975  |
| V9 (1)              | TCATACTCATATGAGCCAGATTTGGTGGCACTCTTGTTGAATGCAGGACCACTCACTGTA  | 975  |



|         |                                                              |     |
|---------|--------------------------------------------------------------|-----|
| V10 (2) | TCATACTCATATGAGCCAGATTTGGTGGCACTCTTGTTGAATGCAGGACCACTCACTGTA | 975 |
| V11 (5) | TCATACTCATATGAGCCAGATTTGGTGGCACTCTTGTTGAATGCAGGACCACTCACTGTA | 975 |
| V12 (2) | TCATACTCATATGAGCCAGATTTGGTGGCACTCTTGTTGAATGCAGGACCACTCACTGTA | 975 |
|         | *****                                                        |     |

|                     |                                                              |      |
|---------------------|--------------------------------------------------------------|------|
| TP02_0140 (genomic) | CCAGTTGCAGTGAGCGAGGATTGGCAATTCTACGCTGATGGAACCTTGGATGTATGCGGT | 1140 |
| XM_759616 (mRNA)    | CCAGTTGCAGTGAGCGAGGATTGGCAATTCTACGCTGATGGAACCTTGGATGTATGCGGT | 1140 |
| V1 (3)              | CCAGTTGCAGTGAGCGAGGATTGGCAATTCTACGCTGATGGAACCTTGGATGTATGCGGT | 1035 |
| V2 (2)              | CCAGTTGCAGTGAGCGAGGATTGGCAATTCTACGCTGATGGAACCTTGGATGTGTGCGGT | 1035 |
| V3 (1)              | CCAGTTGCAGTGAGCGAGGATTGGCAATTCTACGCTGATGGAACCTTGGATGTGTGCGGT | 1035 |
| V4 (1)              | CCAGTTGCAGTGAGCGAGGATTGGCAATTCTACGCTGATGGAACCTTGGATGTGTGCGGT | 1035 |
| V5 (1)              | CCAGTTGCAGTGAGCGAGGATTGGCAATTCTACGCTGATGGAACCTTGGATGTGTGCGGT | 1035 |
| V6 (3)              | CCAGTTGCAGTGAGCGAGGATTGGCAATTCTACGCTGATGGAACCTTGGATGTGTGCGGT | 1035 |
| V7 (1)              | CCAGTTGCAGTGAGCGAGGATTGGCAATTCTACGCTGATGGAACCTTGGATGTGTGCGGT | 1035 |
| V8 (1)              | CCAGTTGCAGTGAGCGAGGATTGGCAATTCTACGCTGATGGAACCTTGGATGTGTGCGGT | 1035 |
| V9 (1)              | CCAGTTGCAGTGAGCGAGGATTGGCAATTCTACGCTGATGGAACCTTGGATGTGTGCGGT | 1035 |
| V10 (2)             | CCAGTTGCAGTGAGCGAGGATTGGCAATTCTACGCTGATGGAACCTTGGATGTGTGCGGT | 1035 |
| V11 (5)             | CCAGTTGCAGTGAGCGAGGATTGGCAATTCTACGCTGATGGAACCTTGGATGTGTGCGGT | 1035 |
| V12 (2)             | CCAGTTGCAGTGAGCGAGGATTGGCAATTCTACGCTGATGGAACCTTGGATGTGTGCGGT | 1035 |
|                     | *****                                                        |      |

|                     |                                                               |      |
|---------------------|---------------------------------------------------------------|------|
| TP02_0140 (genomic) | GCTGAATTGAACCACCTTCTTGACCCTAGTAGGTGTCAGCTTTGACGAAAAAGGCAATCAC | 1200 |
| XM_759616 (mRNA)    | GCTGAATTGAACCACCTTCTTGACCCTAGTAGGTGTCAGCTTTGACGAAAAAGGCAATCAC | 1200 |
| V1 (3)              | GCTGAATTGAACCACCTTCTTGACCCTAGTAGGTGTCAGCTTTGACGAAAAAGGCAATCAC | 1095 |
| V2 (2)              | GCTGAATTGAACCACCTTCTTGACCCTAGTAGGTGTCAGCTTTGACGAAAAAGGCAATCAC | 1095 |
| V3 (1)              | GCTGAATTGAACCACCTTCTTGACCCTAGTAGGTGTCAGCTTTGACGAAAAAGGCAATCAC | 1095 |
| V4 (1)              | GCTGAATTGAACCACCTTCTTGACCCTAGTAGGTGTCAGCTTTGACGAAAAAGGCAATCAC | 1095 |
| V5 (1)              | GCTGAATTGAACCACCTTCTTGACCCTAGTAGGTGTCAGCTTTGACGAAAAAGGCAATCAC | 1095 |
| V6 (3)              | GCTGAATTGAACCACCTTCTTGACCCTAGTAGGTGTCAGCTTTGACGAAAAAGGCAATCAC | 1095 |
| V7 (1)              | GCTGAATTGAACCACCTTCTTGACCCTAGTAGGTGTCAGCTTTGACGAAAAAGGCAATCAC | 1095 |
| V8 (1)              | GCTGAATTGAACCACCTTCTTGACCCTAGTAGGTGTCAGCTTTGACGAAAAAGGCAATCAC | 1095 |
| V9 (1)              | GCTGAATTGAACCACCTTCTTGACCCTAGTAGGTGTCAGCTTTGACGAAAAAGGCAATCAC | 1095 |
| V10 (2)             | GCTGAATTGAACCACCTTCTTGACCCTAGTAGGTGTCAGCTTTGACGAAAAAGGCAATCAC | 1095 |
| V11 (5)             | GCTGAATTGAACCACCTTCTTGACCCTAGTAGGTGTCAGCTTTGACGAAAAAGGCAATCAC | 1095 |
| V12 (2)             | GCTGAATTGAACCACCTTCTTGACCCTAGTAGGTGTCAGCTTTGACGAAAAAGGCAATCAC | 1095 |
|                     | *****                                                         |      |

|                     |                                                                |      |
|---------------------|----------------------------------------------------------------|------|
| TP02_0140 (genomic) | TGGATACTCAAAAACCTCATTTCGGTGAAGGCTGGGGAAACAAGGGATACCTACTGTTGACT | 1260 |
| XM_759616 (mRNA)    | TGGATACTCAAAAACCTCATTTCGGTGAAGGCTGGGGAAACAAGGGATACCTACTGTTGACT | 1260 |
| V1 (3)              | TGGATACTCAAAA-----                                             | 1109 |
| V2 (2)              | TGGATACTCAAAA-----                                             | 1109 |

|                     |                                                                      |      |
|---------------------|----------------------------------------------------------------------|------|
| V3 (1)              | TGGATACTCAAAAA-----                                                  | 1109 |
| V4 (1)              | TGGATACTCAAAAA-----                                                  | 1109 |
| V5 (1)              | TGGATACTCAAAAA-----                                                  | 1109 |
| V6 (3)              | TGGATACTCAAAAA-----                                                  | 1109 |
| V7 (1)              | TGGATACTCAAAAA-----                                                  | 1109 |
| V8 (1)              | TGGATACTCAAAAA-----                                                  | 1109 |
| V9 (1)              | TGGATACTCAAAAA-----                                                  | 1109 |
| V10 (2)             | TGGATACTCAAAAA-----                                                  | 1109 |
| V11 (5)             | TGGATACTCAAAAA-----                                                  | 1109 |
| V12 (2)             | TGGATACTCAAAAA-----                                                  | 1109 |
|                     | *****                                                                |      |
| TP02_0140 (genomic) | CGCAATAGCAAGGAATACAAAGATGATTGTGGATTGAC <u>CTCCTTCGCAGTGTACGCAGTT</u> | 1320 |
| XM_759616 (mRNA)    | CGCAATAGCAAGGAATACAAAGATGATTGTGGATTGACCTCCTTCGCAGTGTACGCAGTT         | 1320 |
| V1 (3)              | -----                                                                | 1109 |
| V2 (2)              | -----                                                                | 1018 |
| V3 (1)              | -----                                                                | 1109 |
| V4 (1)              | -----                                                                | 1107 |
| V5 (1)              | -----                                                                | 1107 |
| V6 (3)              | -----                                                                | 1109 |
| V7 (1)              | -----                                                                | 1109 |
| V8 (1)              | -----                                                                | 1109 |
| V9 (2)              | -----                                                                | 1109 |
| V10 (2)             | -----                                                                | 1109 |
| V11 (5)             | -----                                                                | 1109 |
| V12 (2)             | -----                                                                | 1109 |
| TP02_0140 (genomic) | <u>TAA</u> AGATCAAAAATTGATATTTAATTATAATTGTACCACAAATTCTGTCCAAAGCTTTAG | 1380 |
| XM_759616 (mRNA)    | TAAAGATCAAAAATTGATATTTAATTATAATTGTACCACAAATTCTGTCCAAAGCTTTAG         | 1380 |
| V1 (3)              | -----                                                                | 1109 |
| V2 (2)              | -----                                                                | 1018 |
| V3 (1)              | -----                                                                | 1109 |
| V4 (1)              | -----                                                                | 1107 |
| V5 (1)              | -----                                                                | 1107 |
| V6 (3)              | -----                                                                | 1109 |
| V7 (1)              | -----                                                                | 1109 |
| V8 (1)              | -----                                                                | 1109 |
| V9 (1)              | -----                                                                | 1109 |
| V10 (2)             | -----                                                                | 1109 |
| V11 (5)             | -----                                                                | 1109 |
| V12 (2)             | -----                                                                | 1109 |

Primer regions are in bold, underlined and italicized text.

<sup>1</sup> Include X.1 variants.

Table S10b: Tp8 protein variant Clustal alignment

|                      |                                                              |     |
|----------------------|--------------------------------------------------------------|-----|
| XP_764709            | MLGNHVMGSNSPHIKILSSVTFLHIAKMEEVENVKVDALERVDTESVLNYDTVLEKKPLR | 60  |
| V1 (3)               | -----VDALERVDTESVLNYDTVLEKKPLR                               | 25  |
| V2 (1)               | -----VDALERVDTESVLNYDTVLEKKPLR                               | 25  |
| V3 (1)               | -----VDALERVDTESVLNYDTVLEKKPLR                               | 25  |
| V4 (2)               | -----VDALERVDTESVLNYDTVLEKKPLR                               | 25  |
| V5 (1)               | -----VDALERVDTESVLNYDTVLEKKPLR                               | 25  |
| V6 (5) <sup>1</sup>  | -----VDALERVDTESVLNYDTVLEKKPLR                               | 25  |
| V7 (10) <sup>1</sup> | -----VDALERVDTESVLNYDTVLEKKPLR                               | 25  |
|                      | *****                                                        |     |
| XP_764709            | SSVASFFKRYSAVLVILTAVLLFTFTFAAIALSSGRSAIRKNRELLSVEFEKLQFDNFVT | 120 |
| V1 (3)               | SSVASFFKRYSAVLVILTAVLLFTFTFAAIALSSGRSAIRKNRELLSVEFEKLQFDNFVT | 85  |
| V2 (1)               | SSVASFFKRYSAVLVILTAVLLFTFTFAAIALSSGRSAIRKNRELLSVEFEKLQFDNFVT | 85  |
| V3 (1)               | SSVASFFKRYSAVLVILTAVLLFTFTFAAIALSSGRSAIRKNRELLSVEFEKLQFDNFVT | 85  |
| V4 (2)               | SSVASFFKRYSAVLVILTAVLLFTFTFAAIALSSGRSAIRKNRELLSVEFEKLQFDNYVT | 85  |
| V5 (1)               | SSVASFFKRYSAVLVILTAVLLFTFTFAAIALSSGRSAIRKNRELLSVEFEKLQFDNFVT | 85  |
| V6 (5)               | SSVASFFKRYSAVLVILTAVLLFTFTFAAIALSSGRSAIRKNRELLSVEFEKLQFDNFVT | 85  |
| V7 (10)              | SSVASFFKRYSAVLVILTAVLLFTFTFAAIALSSGRSAIRKNRELLSVEFEKLQFDNFVT | 85  |
|                      | *****                                                        |     |
| XP_764709            | IKGEREEDFPKMVAEVLYKVAVEFDPKKEALIYVQFNDFNKQHDKKHNNYRHKKTSYTNF | 180 |
| V1 (3)               | IKGEREEDFPKMVAEVLYKVAVEFDPKKEALIYVQFNDFNKQHDKKHNNYRHKKTSYTNF | 145 |
| V2 (1)               | IKGEREEDFPKMVAEVLYKVAVEFDPKKEALIYVQFNDFNKQHDKKHNNYRHKKTSYTNF | 145 |
| V3 (1)               | IKGEREEDFPKMVAEVLYKVAVEFDPKKEALIYVQFNDFNKQHDKKHNNYRHKKTSYTNF | 145 |
| V4 (2)               | IKGEREEDFPKMVAEVLYKVAVEFDPKKEALIYVQFNDFNKQHDKKHNNYRHKKTSYTNF | 145 |
| V5 (1)               | IKGEREEDFPKMVAEVLYKVAVEFDPKKEALIYVQFNDFNKQHDKKHNNYRHKKTSYTNF | 145 |
| V6 (5)               | IKGEREEDFPKMVAEVLYKVAVEFDPKKEALIYVQFNDFNKQHDKKHNNYRHKKTSYTNF | 145 |
| V7 (10)              | IKGEREEDFPKMVAEVLYKVAVEFDPKKEALIYVQFNDFNKQHDKKHNNYRHKKTSYTNF | 145 |
|                      | *****                                                        |     |
| XP_764709            | RNNLNDINEHNAKPNLSYTKSMNHFGDISSKDFMKRYTKKVLLNLPKDHVSTYNNNRPMS | 240 |
| V1 (3)               | RNNLNDINEHNAKPNLSYTKSMNHFGDISSKDFMKRYTKKVLLNLPKDHVSTYNNNRPMS | 205 |
| V2 (1)               | RNNLNDINEHNAKPNLSYTKSMNHFGDISSKDFMKRYTKKVLLNLPKDHVSTYNNNRPMS | 205 |
| V3 (1)               | RNNLNDINEHNAKPNLSYTKSMNHFGDISSKDFMKRYTKKVLLNLPKDHVSTYNNNRPMS | 205 |
| V4 (2)               | RNNLNDINEHNAKPNLSYTKSMNHFGDISSKDFMKRYTKKVLLNLPKDHASTYNNNRPMS | 205 |
| V5 (1)               | RNNLNDINEHNAKPNLSYTKSMNHFGDISSKDFMKRYTKKVLLNLPKDHASTYNNNRPMS | 205 |
| V6 (5)               | RNNLNDINEHNAKPNLSYTKSMNHFGDISSKDFMKRYTKKVLLNLPKDHVSTYNNNRPMS | 205 |
| V7 (10)              | RNNLNDINEHNAKPNLSYTKSMNHFGDISSKDFMKRYTKKVLLNLPKDHVSTYNNNRPMS | 205 |

\* .\*\*\*\*\* .\*\*\*\*\* .\*\*\*\*\*

|           |                                                              |     |
|-----------|--------------------------------------------------------------|-----|
| XP_764709 | VDLRSHGVLTpvkCQEENELSWPYSVVAVAESFVKKTSQKTVSLSEKQLVDCVTDKKSAN | 300 |
| V1 (3)    | VDLRSHGVLTpvkCQEENELSWPYSVVAVAESFVKKTSQKTVSLSEKQLVDCVTDKKSAN | 265 |
| V2 (1)    | VDLRSHGVLTpvkCQEENELSWPYSVVAVAESFVKKTSQKTVSLSEKQLVDCVTDKKSAN | 265 |
| V3 (1)    | VDLRSHGVLTpvkCQEENELSWPYSVVAVAESFVKKTSQKTVSLSEKQLVDCVTDKKSAN | 265 |
| V4 (2)    | VDLRSHGVLTpvkCQEENELSWPYSVVAVAESFVKKTSQKTVSLSEKQLVDCVTDKKSAN | 265 |
| V5 (1)    | VDLRSHGVLTpvkCQEENELSWPYSVVAVAESFVKKTSQKTVSLSEKQLVDCVTDKKSAN | 265 |
| V6 (5)    | VDLRSHGVLTpvkCQEENELSWPYSVVAVAESFVKKTSQKTVSLSEKQLVDCVTDKKSAN | 265 |
| V7 (10)   | VDLRSHGVLTpvkCQEENELSWPYSVVAVAESFVKKTSQKTVSLSEKQLVDCVTDKKSAN | 265 |

\*\*\*\*\* .\*

|           |                                                              |     |
|-----------|--------------------------------------------------------------|-----|
| XP_764709 | NPFLGYKYLKDLGLFESELVDKSTTKCPALEGERFKVPSYSYSYEPDLVALLLNAGPLTV | 360 |
| V1 (3)    | NPFLGYKYLKDLGLFESELVDKSTTKCPALEGERFKVPSYSYSYEPDLVALLLNAGPLTV | 325 |
| V2 (1)    | NPFLGYKYLKDLGLFESELVDKSTTKCPALEGERFKVPSYSYSYEPDLVALLLNAGPLTV | 325 |
| V3 (1)    | NPFLGYKYLKDLGLFESELVDKSTTKCPALEGERFKVPSYSYSYEPDLVALLLNAGPLTV | 325 |
| V4 (2)    | NPFLGYKYLKDLGLFESELVDKSTTKCPALEGERFKVPSYSYSYEPDLVALLLNAGPLTV | 325 |
| V5 (1)    | NPFLGYKYLKDLGLFESELVDKSTTKCPALEGERFKVPSYSYSYEPDLVALLLNAGPLTV | 325 |
| V6 (5)    | NPFLGYKYLKDLGLFESELVDKSTTKCPALEGERFKVPSYSYSYEPDLVALLLNAGPLTV | 325 |
| V7 (10)   | NPFLGYKYLKDLGLFESELVDKSTTKCPALEGERFKVPSYSYSYEPDLVALLLNAGPLTV | 325 |

\*\*\*\*\* .\*

|           |                                                              |     |
|-----------|--------------------------------------------------------------|-----|
| XP_764709 | PVAVSEDWQFYADGTLdVCGAELNHFLTLVGVSFDEKGNHWILKNSFGEGWGNKGYLLLT | 420 |
| V1 (3)    | PVAVSEDWQFYADGTLdVCGAELNHFLTLVGVSFDEKGNHWILK-----            | 369 |
| V2 (1)    | PVAVSEDWQFYADGTLdVCGAELNHFLTLVGVSFDEKGNHWILK-----            | 369 |
| V3 (1)    | PVAVSEDWQFYADGTLdVCGAELNHFLTLVGVSFDEKGNHWILK-----            | 369 |
| V4 (2)    | PVAVSEDWQFYADGTLdVCGAELNHFLTLVGVSFDEKGNHWILK-----            | 369 |
| V5 (1)    | PVAVSEDWQFYADGTLdVCGAELNHFLTLVGVSFDEKGNHWILK-----            | 369 |
| V6 (5)    | PVAVSEDWQFYADGTLdVCGAELNHFLTLVGVSFDEKGNHWILK-----            | 369 |
| V7 (10)   | PVAVSEDWQFYADGTLdVCGAELNHFLTLVGVSFDEKGNHWILK-----            | 369 |

\*\*\*\*\*

Eptiope region highlighted in grey.

Table S11a: Tp9 nucleotide variant Clustal alignment

```

TP02_0140      ATGAATGTTCTAACTACTGGAAATAATTTTATACTCATTCTATCTTTCCATTTGTA-TGGA
XM_760370      ATGAATGTTCTAACTACTGGAATAATTTTATACTCATTCTATCTTTCCATTTGTA-TGGA
V1 (3)         -----ATAATTTTATACTCATTCTATCTTTCCATTTGTA-TGGA
V2 (3)         -----ATTTGTA-TGGA
V3 (2)         -----ACTTCTA-AGGA
V4 (3)         -----
V5 (1)         -----ATAATTTTATACTCATTTTACACATGCCTTTGTA-TGGA
V6 (2)         -----GTTTGTA-AGGA
V7 (1)         -----CTTGCAAGTGGGA
V8 (1)         -----AATAATTTTATACTCATTCTATCTTTT-ATTG
V9 (1)         -----CTTGCAAG-TGGA
V10 (1)        -----GCTGCTG-AGGA
V11 (1)        -----
V12 (1)        -----ATTTGTA-TGGA
V13 (1)        -----GCTGCTG-AGGA
V14 (1)        -----TTTAGTG-TGGA
V15 (1)        -----
V16 (1)        -----GTCAGACTGGTCGTACGATGCATTTGTC-TGGA
V17 (1)        -----GTTA-CAGT
V18 (2)        ---ATGAATGTTCTAACTACTGGTATAATTTTATACTCATTCTACATGTCCATTT-GTAT
V19 (1)        -----AATAATTTTATTCTCATTTTACACATGCCTTTGTA-TGGA
V20 (1)        ---ATGAATGTTCTAACTACTGGAATAATTTTATACTCATTCTATCTTTCCATTT-GTAT
V21 (1)        -----AATAATTTTATACTCATTCTATCTTTCCATTTGTA-TGGA
V22 (1)        ATGAATGTTCTAACTACTGGAATAATTTTATACTCATTCTATCAATGTATTTGTA-TGGA
V23 (1)        -----AATAATTTTATACTCATTCTACCAATGCATTTGTA-TGGA
V24 (1)        -----AATAATTTTGTACTCATTCTACACATGCCTTTGTA-TGAA
V25 (1)        -----AATAATTTTGTACTCATTCTACACATGCCTTTGTA-TGAA
V26 (1)        -----AATAATTTTATACTCATTCTACATGTCCATTTGTA-TGGA
V27 (1)        -----AATAATTTTATACTCATTCTATCTTTCCATTTGTA-TGGA
V28 (1)        ATGAATGTTCTAACTACTGGAATAATTTTATACTCATTCTATCTTTCCATTTGTA-TGGA

TP02_0140      TCCTGATGATGATGATATTTGGATTTCGATCCTGATGACGATGGAGACGGAAGCATGCTCCC
XM_760370      TCCTGATGATGATGATATTTGGATTTCGATCCTGATGACGATGGAGACGGAAGCATGCTCCC
V1 (3)         TCCTGATGATGATGATATTTGGATTTCGATCCTGATGACGATGGAGACGGAAGCATGCTCCC
V2 (3)         TTCTGGTG--AAGAA----GAAGATGATGTTTTTCGGTGCTGAAGGAGGTAGCATGCTACC
V3 (2)         TTCTGGTG--ATGAT----GATGATGATGTTTTTCGGTGCTGCGGGAGGTAGCATGCAACC

```

V4 (3) -TCTGGTG--ATGAT----GATGATGATGTTTTTCGGTGCTGCGGGAGGTAGCATGCTACC  
V5 (1) TCCTGATG--AT-----GATGATGCTTTTCGGTGATGACGGAGGTAGCATGCTACC  
V6 (2) TACTGGTG--ATG-----ATGATGATGTTTTTCGGTGATGACGGAGGTAGCATGCTAAC  
V7 (1) TTCTGATG--ATGAT----GATGATGATGTTTTTCGGTGCTGCGGGAGGTAGCATGCTACC  
V8 (1) TATGGATACTGTGAT----GATGATGATGTTTTTCGGTGATGACGCGGATAGCATGCTCCC  
V9 (1) TTCTGATG--ATGAT----GATGATGATGTTTTTCGGTGCTGCGGGAGGTAGCATGCTACC  
V10 (1) TCCTGGTG--AAGAA----GAAGATGATGTTTTTCGGTGCTGAAGGAGGTAGCATGCAACC  
V11 (1) -----GATGTTTTTCGGTGCTGAAGGAGGTAGCATGCTACC  
V12 (1) TTCTGGTG--AAGAA----GAAGATGATGTTTTTCGGTGCTGAAGGAGGTAGCATGCTACC  
V13 (1) TCCTGGTG--AAGAA----GAAGATGATGTTTTTCGGTGCTGAAGGAGGTAGCATGCAACC  
V14 (1) TCCTGGTG--AAGAA----GAAGATGATGTTTTTCGGTGCTGAAGGAGGTAGCATGCTACC  
V15 (1) -----C  
V16 (1) TTCTGGTG--AAGAA----GAAGATGATGTTTTTCGGTGCTGAAGGAGGTAGCATGCTCCC  
V17 (1) GGATCCTG--ATGAT----AATGATGATGTTTTTCGGTGATGACGAAGGTAGCATGCTCCC  
V18 (2) GGATCCTG--ATGAT----AATGATGATGTTTTTCGGTGATGACGAAGGTAGCATGCTCCC  
V19 (1) TTCTGATG-----ATGATGTTTTTCGGTGCTGACGACGGTAGCATGCTACC  
V20 (1) GGATACTG--GTGAT----GATGATGATGTTTTTCGGTGCTCCGGGAGGTAGCATGCTACC  
V21 (1) TCCTGATGATGATGTATTTGGATTTCGATCCTGATGACGATGGAGACGGAAGCATGCTCCC  
V22 (1) TTCTGGTG--ATGAT----GATGATGATGTTTTTCGGTGCTGCGGGAGGTAGCATGCTACC  
V23 (1) TTCTGGTG--ATGAT----GATGATGATGTTTTTCGGTGCTGCGGGAGGTAGCATGCTACC  
V24 (1) TTCTGACG--ATGAC----GATGATGATGCTTTTCGGTGCTGAAGGAGGTAGCATGCTCCC  
V25 (1) TTCTGACG--ATGAC----GATGATGATGCTTTTCGGTGCTGAAGGAGGTAGCATGCTCCC  
V26 (1) TACTGATG--AAGAA----GATGATGATGTTTTTCGGGAGATCCAGGAGGTAGCATGCTACC  
V27 (1) TACTGGTG--ATG-----ATGATGATGTTTTTCGGTGCTGACGGAGGTAGCATGCTCCC  
V28 (1) TACTGGTG--ATG-----ATGATGATGTTTTTCGGTGCTGACGGAGGTAGCATGCTCCC

TP02\_0140 TCCGCACCAAAGAAGCTCTATGTTTCGTGATGATCTCGGATCATCATTTACCTCAGGTTA  
XM\_760370 TCCGCACCAAAGAAGCTCTATGTTTCGTGATGATCTCGGATCATCATTTACCTCAGGTTA  
V1 (3) TCCGCACCAAAGAAGCTCTATGTTTCGTGATGATCTCGGATCATCATTTACCTCAGGTTA  
V2 (3) TCCACGCCAAAGAAGCTCTATGTTTGGTGAGCCTCTCGGATCATTACATACAGGAGGTTA  
V3 (2) TCCACGCCAAAGAAGCCCTATGTTTAGTGGTGGTCTCGGATCATCATTTACCTCAGGTTA  
V4 (3) TCCACGCCAAAGAAGCCCTATGTTTAGTGGTGGTCTCGGATCATCATTTACCTCAGGTTA  
V5 (1) TGAGCACAAACCATTCTCTATGATTAGCGGTGGTCTAGGATCATCACATACCGGAGGTTA  
V6 (2) TCCACACCAAAGAAGCTCTATGTTTCGTGATGATCTCGGATCATCATTTACCTCAGGTTA  
V7 (1) TCCACGCCAAAGAAGCCCTATGTTTAGTGGTGGTCTCGGATCATCATTTACCTCAGGTTA  
V8 (1) TAAACACCAAAGAAGCTCCGTGTTTGGTAGTGGTCTCGGATCAACATTTACCTCAGGTTA  
V9 (1) TCCACGCCAAAGAAGCTCTATGTTTGGTAGCCTCTTGATCAACATTTACCTCAGGTTA  
V10 (1) TCCACACCAAAGAAGCTCTATGCTTGGTAGTGGTCTCGGATCAACAATTACCTCAGGTTA  
V11 (1) TCCACGCCAAAGAAGCTCTATGTTTGGTGAGCCTCTCGGATCATTACATACAGGAGGTTA  
V12 (1) TCCACGCCAAAGAAGCTCTATGTTTGGTGAGCCTCTCGGATCATTACTTACCGGAGGTTA

V13 (1) TCCACACCAAAGAAGCTCTATGCTTGGTAGTGGTCTCGGATCAACATTTACCTCAGGTTA  
V14 (1) TCCACACCAAAGAAGCTCTATGCTTGGTAGTGGTCTCGGATCAACATTTACCTCAGGTTA  
V15 (1) TTCACACCAAAGAAGCTCTATGCTTGGTAGTGGTCTCGGATCAACATTTACCTCAGGTTA  
V16 (1) TAAACACCAAAGAAGCTCTATGCTTGGTAGTGGTCTCGGATCAACATTTACCTCAGGTTA  
V17 (1) TAAACACCAAAGAAGCTCTATGCTTGGTAGTGGTCTCGGATCAACATTTACCTCAGGTTA  
V180 (2) TAAACACCAAAGAAGCTCTATGCTTGGTAGTGGTCTCGGATCAACATTTACCTCAGGTTA  
V19 (1) TCCACACCAAAGAAGCTCTATGTTTAGTGAGCCTCTCGGATCATTACATACCGGAGGTTA  
V20 (1) TCCACGCCAAAGAAGCTCTGTGTTTAGTGGTGGTATAGGATCAACATTTACCTCAGGTTA  
V21 (1) TCCGCACCAAAGAAGCTCCATCTTTAGTAGTGATCTAGGATCAACATTTACCACAGGTTA  
V22 (1) TCCACGCCAAAGAAGCCCTATGTTTAGTGGTGGTCTCGGATCATCATTACCTCAGGTTA  
V23 (1) TCCACGCCAAAGAAGCCCTATGTTTAGTGGTGGTCTCGGATCATCATTACCTCAGGTTA  
V24 (1) TAGGCACAAAAGAAGCTCTATGTTTAGTGAGCCTCTTGGATCAACATTTACCTCAGGTTA  
V25 (1) TAGGCACAAAAGAAGCTCTATGTTTAGTGAGCCTCTTGGATCAACATTTACCTCAGGTTA  
V26 (1) TCCACGCCAAAGAAGCTCCGTGTTTAGTGGTGGTCTCGGATCAACATTTACCTCAGGTTA  
V27 (1) TAGGCACCAAAGAAGCTCCGTGTTTAGTGGTGGTCTAGGAGAAACATTTACCTCAGGTTA  
V28 (1) TAGGCACCAAAGAAGCTCCGTGTTTAGTGGTGGTCTAGGAGAAACATTTACCTCAGGTTA

\* \*\* \*\*\*

TP02\_0140 TACTAAACAAGATTTGGATGCCAAATTTCCAGGTATGAAAAAGAGTAAGGGGCCCAAAGA  
XM\_760370 TACTAAACAAGATTTGGATGCCAAATTTCCAGGTATGAAAAAGAGTAAGGGGCCCAAAGA  
V1 (3) TACTAAACAAGATTTGGATGCCAAATTTCCAGGTATGAAAAAGAGTAAGGGGCCCAAAGA  
V2 (3) TGGTGATGAAGAATTTGAAAATAAATTTAAAAGTATGGGAATTGGTAAGAAACCCAAAGA  
V3 (2) TACTAGACAAGAGTTGGATGC AAAATTTCCAGGTATGAAAAAGGGTAAGGGATCCAAAGA  
V4 (3) TACTAGACAAGAGTTGGATGC AAAATTTCCAGGTATGAAAAAGGGTAAGGGATCCAAAGA  
V5 (1) TGATGATGATGAATTTCAACGAAAATTTCAACGTATGGGAATTGGTAAGAAACCCAAAGA  
V6 (2) TACTAGACAAGAGTTGGATGC AAAATTTCCAAATTTGAAAGCTCGTAGAGGGCCTATAGG  
V7 (1) TACTAGACAAGAGTTGGATGC AAAATTTCCAGGTATGAAAAAGGGTAAGGGATCCAAAGA  
V8 (1) CAGTGATCAAGAATTTGGAGGAGAAAATTTCAACGTATGGGAATTGGTAAGAAACCCAAAGA  
V9 (1) CAGTGATGATGAATTTGAAGAGAAAATTTAAGCGTATGGGAATGAAGAAGAAACCCAAAGA  
V10 (1) CAGTGATCAAGAATTTGACGAGAAAATTTCAACGTATGGGAATTGGTAAGAAACCCAAAGA  
V11 (1) TGGTGATGAAGAATTTGAAAATAAATTTAAAAGTATGGGAATTGGTAAGAAACCCAAAGA  
V12 (1) TGGTGATGAAGAATTTGAAAATAAATTTAAAAGTATGGGAATTGGTAAGAAACCCAAAGA  
V13 (1) CAGTGATCAAGAATTTGACGAGAAAATTTCAACGTATGGGAATTGGTAAGAAACCCAAAGA  
V14 (1) CAGTGATCAAGAATTTGACGAGAAAATTTCAACGTATGGGAATTGGTAAGAAACCCAAAGA  
V15 (1) CAGTGATCAAGAATTTGACGAGAAAATTTCAACGTATGGGAATTGGTAAGAAACCCAAAGA  
V16 (1) CAGTGATCAAGAATTTGACGAGAAAATTTAAACATATGGGAATTGGTAAGAAACCCAAAGA  
V17 (1) CAGTGATCAAGAATTTGACGAGAAAATTTCAACGTATGGGAATTGGTAAGAAACCCAAAGA  
V18 (2) CAGTGATCAAGAATTTGACGAGAAAATTTCAACGTATGGGAATTGGTAAGAAACCCAAAGA  
V191 (1) TGGTGATGAAGAATTTGAAAATAAATTTAAACATATGAGAATTGGTAAGAAACCCAAAGA  
V20 (1) CAGTGATAAAGAATTTGAGGAGAAAATTTCAACGTATGGGAATTGGTAAGAAACCCAAAGA  
V21 (1) TACTTGCTGGGATTTGGAAAATAAATTTCCGGGTATGAAAAAGGGTAAGGGGCATAAAGA



V22 (1) TACTAGACAAGAGTTGGATGCAAAATTTCCAGGTATGAAAAAGGGTAAGGGATCCAAAGA  
V23 (1) TACTAGACAAGAGTTGGATGCAAAATTTCCAGGTATGAAAAAGGGTAAGGGATCCAAAGA  
V24 (1) CAGTGATGATGAATTTGAAGAGAAATTTAAGCGTATGGGAATGAAGAAGAAACCCAAAGA  
V25 (1) CAGTGATGATGAATTTGAAGAGAAATTTAAGCGTATGGGAATGAAGAAGAAACCCAAAGA  
V26 (1) CAGTGATCAAGAATTTGACGAGAAATTTAAACATATGAGAATTGGTAAGAAACCCAAAGA  
V27 (1) CAGTGATCAAGAATTTGACGAGAAATTTAAACATATGGGAATTGGTAAGAAACCCAAAGA  
V28 (1) CAGTGATCAAGAATTTGACGAGAAATTTAAACATATGGGAATTGGTAAGAAACCCAAAGA

\* \* \* \* \* \*\* \*

TP02\_0140 CAAAG-----GGAAACCTCA-----TCCTACAAAGCCTGTCAAGAGTACCTTAATGC  
XM\_760370 CAAAG-----GGAAACCTCA-----TCCTACAAAGCCTGTCAAGAGTACCTTAATGC  
V1 (3) CAAAG-----GGAAACCTCA-----TCCTACAAAGCCTGTCAAGAGTACCTTAATGC  
V2 (3) CAAAG-----GGAAACCTCA-----TCCTACAAAGCCTGTCAAGAGTACCTTAATGC  
V3 (2) CAAAG-----GGCAACCTAA-----GCTTCCAAAGCCCGTCAAAAGTACCTTAATGC  
V4 (3) CAAAG-----GGCAACCTAA-----GCTTCCAAAGCCCGTCAAAAGTACCTTAATGC  
V5 (1) CAAATTA-----GGAAGGACAA-----ACCAACCTCAACCGGGAGCTGCA-----  
V6 (2) CAAACCC-----AGAGGCCAAC-----CTCAAACCTCATCAAGCAGCTGGC-----  
V7 (1) CAAAGCCCCGTGGAACAACCCA-CCTCAACCTCCAAAGCCTGTAAAAGTACCTTAATTC  
V8 (1) CAAAG-----GGAAACCTCA-----TCCTACAAAGCCTGTCAAGAGTACCTTAATGC  
V9 (1) CAAACTC-----GGAAGGACAA-----ACCAACCTCAACCAGGAACAGTA-----  
V10 (1) CAAAG-----GGAAACCTCA-----TCCTACAAAGCCCGTCAAAAGTACCTTAATGC  
V11 (1) CAAAG-----GGAAACCTCA-----TCCTACAAAGCCTGTCAAGAGTACCTTAATGC  
V12 (1) CAAAG-----GGAAACCTCA-----TCCTACAAAGCCTGTCAAGAGTACCTTAATGC  
V13 (1) CAAAG-----GGAAACCTCA-----TCCTACAAAGCCCGTCAAAAGTACCTTAATGC  
V14 (1) CAAAG-----GGAAACCTCA-----TCCTACAAAGCCCGTCAAAAGTACCTTAATGC  
V15 (1) CAAAG-----GGAAACCTCA-----TCCTACAAAGCCCGTCAAAAGTACCTTAATGC  
V16 (1) CAAAG-----GGAAACCTCA-----TCCTACAAAGCCCGTCAAAAGTACCTTAATGC  
V17 (1) CAAAG-----GGAAACCTCA-----TCCTACAAAGCCCGTCAAAAGTACCTTAATGC  
V180 (2) CAAAG-----GGAAACCTCA-----TCCTACAAAGCCCGTCAAAAGTACCTTAATGC  
V19 (1) CAAACTC-----GGAAGGACAA-----ACCAACCTCAACCGGGAGCACCT-----  
V20 (1) CAAAG-----GGAAACCTCA-----TCCTACAAAGCCCGTCAAAAGTACCTTAATGC  
V21 (1) CAAAG-----GACAACCTCAACCTCAGCCTCCAAAGCCCGTCAAAAGTACCTTAATGC  
V22 (1) CAAGGCCCGTGGAACAACCCA-CCTCAACCTCCAAAGCCTGTAAAAGTACCTTAATTC  
V23 (1) CAAAGCCCCGTGGAACAACCCA-CCTCAACCTCCAAAGCCTGTAAAAGTACCTTAATTC  
V24 (1) CAAACTC-----GGAAGGACAA-----ACCAACCTCAACCAGGA-----  
V25 (1) CAAACTC-----GGAAGGACAA-----ACCAACCTCAACCAGGAACAGTA-----  
V26 (1) CAAACTC-----GGAAGGACAA-----ACCAACCTCAACAAGGAGCACCT-----  
V27 (1) CAAACTC-----AAAAGAACAA-----ACCAACCTCCACCAGGTCCTACT-----  
V28 (1) CAAACTC-----AAAAGAACAA-----ACCAACCTCCACCAGGTCCTACT-----

\*\*\*

TP02\_0140 CAGGAAATGAT-GGTCA--AACAG-----GAGCTACTGGAGGTTAT---CCAG  
 XM\_760370 CAGGAAATGAT-GGTCA--AACAG-----GAGCTACTGGAGGTTAT---CCAG  
 V1 (3) CAGGAAATGAT-GGTCA--AACAG-----GAGCTACTGGAGGTTAT---CCAG  
 V2 (3) CAGGAAATGAT-GGTCA--AACAG-----GAGCTACTGGACCCTATGGACAAA  
 V3 (2) CAGAGGGTGGTCAATCAGGAGCAGTTGGAGGTTACGGAGCTACTGGACCCTATGGACAAG  
 V4 (3) CAGAGGGTGGTCAATCAGGAGCAGTTGGAGGTTACGGAGCTACTGGACCCTATGGACAAG  
 V5 (1) --GGAGG-----TTATCCAGGCGGTTACCCAAGTCAAC  
 V6 (2) --GGTTATGG-----TCAACCACAAG-----  
 V7 (1) CAGGTGATGATGTTCCACAAG-----GAGCCGTTGGACCTTACGG---AG  
 V8 (1) CAGAGGCTGGTCAATCAGGAGCAGTTGGAGGTTACGGAGCTGCTGGACCCTATGGACAAA  
 V9 (1) --GGAGG-----CTATGGG-----  
 V10 (1) CAGAGGCTGGTCAATCAGGAGCAGTTGGAGGTTACGGAGCTGCTGGACCCTATGGACAAA  
 V11 (1) CAGGAAATGAT-GGTCA--AACAG-----GAGCTACTGGACCCTATGGACAAA  
 V12 (1) CAGGAAATGAT-GGTCA--AACAG-----GACCTACTGGACCCTATGGACAAA  
 V13 (1) CAGAGGCTGGTCAATCAGGAGCAGTTGGAGGTTACGGAGCTGCTGGACCCTATGGACAAA  
 V14 (1) CAGAGGCTGGTCAATCAGGAGCAGTTGGAGGTTACGGAGCTGCTGGACCCTATGGACAAA  
 V15 (1) CAGAGGCTGGTCAATCAGGAGCAGTTGGAGGTTACGGAGCTGCTGGACCCTATGGACAAA  
 V16 (1) CAGAGGCTGGTCAATCAGGAGCAGTTGGAGGTTACGGAGCTGCTGGACCCTATGGACAAA  
 V17 (1) CAGAGGCTGGTCAATCAGGAGCAGTTGGAGGTTACGGAGCTGCTGGACCCTATGGACAAA  
 V180 (2) CAGAGGCTGGTCAATCAGGAGCAGTTGGAGGTTACGGAGCTGCTGGACCCTATGGACAAA  
 V19 (1) --GGGGCATATCCTCCACCTGCAG-----CAGCTGGCGGATTTCGGT-----  
 V20 (1) CAGAGGCTGGTCAATCAGGAGCAGTTGGAGGTTACGGAGCTGCTGGACCCTATGGACAAA  
 V21 (1) CAGAATCCGGTTCGTCCACAAG-----GTGCCGCTGCAGGTTAT---CCAG  
 V22 (1) CAGGTGATGATGTTCCACAAG-----GAGCCGTTGGACCTTACGG---AG  
 V23 (1) CAGGTGATGATGTTCCACAAG-----GAGCCGTTGGACCTTACGG---AG  
 V24 (1) -----  
 V25 (1) --GGAGG-----CTATGGG-----  
 V26 (1) --GGAGCATATCCTCCACCTGCAGCCGCTGGACCTTACGGAGGCGGTTACCCAAGTCAAC  
 V27 (1) --GGGGGCTA-----TGGGCAACCTGGTTATCCAAGTCAAC  
 V28 (1) --GGGGGCTA-----TGGGCAACCTGGTTACCCAAGTCAAC

TP02\_0140 GTGGTTATCCCCTCAA---GGA-----CC--  
 XM\_760370 GTGGTTATCCCCTCAA---GGA-----CC--  
 V1 (3) GTGGTTATCCCCTCAA---GGA-----CC--  
 V2 (3) CTGGTTATCCCCTCAACCTGG-----T-----CC--  
 V3 (2) CAGGTTATGTCGGTCAACCGGG-----AGCTGCTGGAAATTATCCAG  
 V4 (3) CAGGTTATGTCGGTCAACCGGG-----AGCTGCTGGAAATTATCCAG  
 V5 (1) CAGGAGCTGCAGGAGGTTATCC-----  
 V6 (2) -----  
 V7 (1) GCGGTTATCCAAGTCAA---GGA-----CC--

V8 (1) CAGGTTATGTCGGTCAACCTGGTCCTTATGGTCAAACCTGGAGCTGCTGGAGGTTATCAAG  
V9 (1) -----  
V10 (1) CAGGTTATGTCGGTCAACCTGG-----T-----CC--  
V11 (1) CTGGTTATCCCCTCAACCTGG-----T-----CC--  
V12 (1) CTGGTTATCCCCTCAACCTGG-----T-----CC--  
V13 (1) CAGGTTATGTCGGTCAACCTGG-----T-----CC--  
V14 (1) CAGGTTATGTCGGTCAACCTGG-----T-----CC--  
V15 (1) CAGGTTATGTCGGTCAACCTGG-----T-----CC--  
V16 (1) CAGGTTATGTCGGTCAACCTGG-----T-----CC--  
V17 (1) CAGGTTATGTCGGTCAACCTGG-----T-----CC--  
V18 (2) CAGGTTATGTCGGTCAACCTGG-----T-----CC--  
V19 (1) --GGCTATCCGAGTCAATCAGG-----  
V20 (1) CAGGTTATGTCGGTCAACCTGG-----T-----CC--  
V21 (1) CAGGTTATCCCCTCAA---GGA-----CC--  
V22 (1) GCGGTTATCCAAGTCAA---GGA-----CC--  
V23 (1) GCGGTTATCCAACCTCAA---GGA-----CC--  
V24 (1) -----  
V25 (1) -----  
V26 (1) AAGGAGCACCTGGAGCATATCCTCCACCTGCAGCCGCTGGACCTTACGGAGGCGGTTACC  
V27 (1) CACAAGCTGCAGGACCTTACGG-----AGGCGGTTACC  
V28 (1) CACAAGCTGCAGGACCTTACGG-----AGGCGGTTACC

TP02\_0140 -----TTAT---GGTCAACCAGG-----AGCTACTGGACCCTATGGAC  
XM\_760370 -----TTAT---GGTCAACCAGG-----AGCTACTGGACCCTATGGAC  
V1 (3) -----TTAT---GGTCAACCAGG-----AGCTACTGGACCCTATGGAC  
V2 (3) -----TTAC---GGTCAACCAGG-----ACCCGTTGG-----  
V3 (2) GTGGTTATGCTGGTCAACCTGGTCCTTATGGTCAACCAGGAGCTACTGGACCCTATGGAC  
V4 (3) GTGGTTATGCTGGTCAACCTGGTCCTTATGGTCAACCAGGAGCTACTGGACCCTATGGAC  
V5 (1) -----AGGCGGTTACCCAACCTCAACCAGGAGCTGCAGGAGGTTATCCA-  
V6 (2) -----AGGACCTGGGGTATATCCTCCACCGGCAGCAGCTGGACCTTACGGA-  
V7 (1) -----TTAT---GGTCAACCAGG-----AGCTGGACCCTATGGAC  
V8 (1) GTGGTTATCCCCTCAACCTGGTCCTTATGGTCAAACAGGAGCCACTGGACCCTATGGAC  
V9 (1) -----CAA-  
V10 (1) -----TTAT---GGTCAAACGGGTTACGTTGGTCAAACCGGGAGCCGTCGGACCTTACGGA-  
V11 (1) -----TTAC---GGTCAACCAGG-----AGCCACTGGAGGTTATCAA-  
V12 (1) -----TTAC---GGTCAACCAGG-----AGCCACTGGAGGTTATCAA-  
V13 (1) -----TTAT---GGTCAAACGGGTTACGTTGGTCAAACCGGGAGCCGTTGGACCTTACGGA-  
V14 (1) -----TTAT---GGTCAAACGGGTTACGTTGGTCAAACCGGGAGCCGTTGGACCTTACGGA-  
V15 (1) -----TTAT---GGTCAAACGGGTTACGTTGGTCAAACCGGGAGCCGTCGGACCTTACGGA-  
V16 (1) -----TTAT---GGTCAAACGGGTTACGTT-----

V17 (1) -----TTAT---GGTCAAACGGGTTACGTTGGTCAACCGGGAGCCGTTGGACCTTACGGA-  
V18 (2) -----TTAT---GGTCAAACGGGTTACGTTGGTCAACCGGGAGCCGTTGGACCTTACGGA-  
V19 (1) -----ACAAGG-----CGTTTATCCTCCACAA-  
V20 (1) -----TTAT---GGTCAAACGGGTTACGTTGGTCAACCGGGAGCCGTTGGACCTTACGGA-  
V21 (1) -----TTAT---GGTCAACCAGG-----AGCTAGTGGAGGTTATCCA-  
V22 (1) -----TTAT---GGTCAATCAGG-----AGCTGGACCTTATGGAC  
V23 (1) -----TTAT---GGTCAACCAGG-----AGCTGGACCCTATGGAC  
V24 (1) -----  
V25 (1) -----CAA-  
V26 (1) CAAGTCAACAAGGAGCACCTGGAGCATATCCTCCACCTGCAGCCGCTGGACCTTACGGA-  
V27 (1) CAAGTCAACCACAAGGACCTGGGGTATATCCTCCACCAGGAGCAGCTGGACCTTACGGA-  
V28 (1) CAAGTCAACCACAAGGACCTGGGGTATATCCTCCACCAGGAGCAGCTGGACCTTACGGA-

TP02\_0140 AAGCAGGTTACGTTGGTCAACCGGGAGCCGTTGGACCTTACGGTCAACCAGGAGCT----  
XM\_760370 AAGCAGGTTACGTTGGTCAACCGGGAGCCGTTGGACCTTACGGTCAACCAGGAGCT----  
V1 (3) AAGCAGGTTACGTTGGTCAACCGGGAGCCGTTGGACCTTACGGTCAACCAGGAGCT----  
V2 (3) -----  
V3 (2) AAGCAGGTTATGTCGGTCAACC-----GGGAGCTGCTGGAAATTATCCAGGT----  
V4 (3) AAGCAGGTTATGTCGGTCAACC-----GGGAGCTGCTGGAAATTATCCAGGT----  
V5 (1) --GGCGGTTACCCAAGTCAACA-----AGGAGCTGCAGGAGG-----  
V6 (2) --GGTGGTTACCCAAGTCAACC-----AGGAGCATCTGGAGGTTATGGAGGCG---  
V7 (1) AAACGGGTTACGTTGGACCTTACGGAGGCGGTTATCCA-----  
V8 (1) AAGCAGGTTATGTCGGTCAACC-----GGGAGCTGCTGGAGGTTATCCAGGT----  
V9 (1) --CCTGGTTATCCATCTCAACC-----ACAAGCAGCTGGAGC-----  
V10 (1) --GGGGGTTATCCAACCTCAA-----GGACCTTATGGTCAACCAGGAGCT----  
V11 (1) --GGTGGTTATCCAACCTCAACC-----TGGTCTTATCCTCCACCAGGAGCTA---  
V12 (1) --GGTGGTTATCCAACCTCAACC-----TGGTCTTATCCTCCACCAGGAGCTA---  
V13 (1) --GGGGGTTATCCAACCTCAA-----GGACCTTATGGTCAACCAGGAGCT----  
V14 (1) --GGGGGTTATCCAACCTCAA-----GGACCTTATGGTCAACCAGGAGCT----  
V15 (1) --GGGGGTTATCCAACCTCAA-----GGACCTTATGGTCAACCAGGAGCT----  
V16 (1) -----  
V17 (1) --GGGGGTTATCCAACCTCAA-----GGACCTTATGGTCAACCAGGAGCT----  
V18 (2) --GGGGGTTATCCAACCTCAA-----GGACCTTATGGTCAACCAGGAGCT----  
19 (1) -----GGTTACGTTGGACAA-----CC-----  
V20 (1) --GGGGGTTATCCAACCTCAA-----GGACCTTATGGTCAACCAGGAGCT----  
V21 (1) --GCTGGTTATCCCCTCAACC-----TGGTCTTATGTTCAACCAGGAGCTA---  
V22 (1) AAACGGGTTACGTTGGTCAACC-----TGGTCTTATC-----  
V23 (1) AAACGGGTTACGTTGGACCTTACGGAGGCGGTTATCCAACCTCAAGGACCTTATGGTCAAC  
V24 (1) -----GCATCTGGAGG-----  
V25 (1) --CCTGGTTATCCATCTCAACC-----ACAAGCAGCTGGAGC-----

V26 (1) --GGCGGTTACCCAACCTCAACA-----AGGAGCACCTGGAGCATATCC-----  
V27 (1) --GGCGGTTACCCAAGTCAACC-----ACAAGGACCTGGGGTATATCC-----  
V28 (1) --GGCGGTTACCCAAGTCAACC-----ACAAGGACCTGGGGTATATCC-----

TP02\_0140 -----GTACCCTATGGACAAACTGGTTATCCCCTCAACCAGGAGCAGCTGGAGGTT  
XM\_760370 -----GTACCCTATGGACAAACTGGTTATCCCCTCAACCAGGAGCAGCTGGAGGTT  
V1 (3) -----GTACCCTATGGACAAACTGGTTATCCCCTCAACCAGGAGCAGCTGGAGGTT  
V2 (3) -----  
V3 (2) -----GGTTATGATGGTCAACCTGGTCCTTATGGTCAACCAGGAGCTACTGGACCCT  
V4 (3) -----GGTTATGATGGTCAACCTGGTCCTTATGGTCAACCAGGAGCTACTGGACCCT  
V5 (1) -----TT  
V6 (2) -----GTGCATCAGGTGGCGCTGGACCTT  
V7 (1) -----  
V8 (1) -----GGTTATGCTGGTCAACCTGGTCCTTATGGTCAACCAGGAGCTACTGGACCCT  
V9 (1) -----TT  
V10 (1) -----GGACCCTATGGACAAACTGGTTATCCCCTCAACCAGGAGCAGCTGGAGGTT  
V11 (1) -----CTGGACCCTATGGACAAACTAGTTATCCCCTCAACCAGGAGCTGCTGGAGGTT  
V12 (1) -----CTGGACCCTATGGACAAACTAATTATCCCCTCAACCAGGAGCTGCTGGAGGTT  
V13 (1) -----GGACCCTATGGACAAACTGGTTATCCCCTCAACCAGGAGCAGCTGGAGGTT  
V14 (1) -----GGACCCTATGGACAAACTGGTTATCCCCTCAACCAGGAGCAGCTGGAGGTT  
V15 (1) -----GGACCCTATGGACAAACTGGTTATCCCCTCAACCAGGAGCAGCTGGAGGTT  
V16 (1) -----  
V17 (1) -----GGACCCTATGGACAAACTGGTTATCCCCTCAACCAGGAGCAGCTGGAGGTT  
V18 (2) -----GGACCCTATGGACAAACTGGTTATCCCCTCAACCAGGAGCAGCTGGAGGTT  
V19 (1) -----AGGAGCACCTGGGGCCT  
V20 (1) -----GGACCCTATGGACAAACTGGTTATCCCCTCAACCAGGAGCAGCTGGAAATT  
V21 (1) -----CTGGACCCTATCGACAAACGGGTTATCCCCTCAACCAGGAGCTGCTGGAGGTT  
V22 (1) -----CTCCACCAGGAGCTACTGGACCCT  
V23 (1) CAGGAGCTGGACCCTATGGACAAACGGGTTATCCCCTCAACCAGGAGCAGCTGGAGGTT  
V24 (1) -----TT  
V25 (1) -----TT  
V26 (1) -----TCCACCTGCAGCCGCTGGACCTT  
V27 (1) -----TCCACCAGGAGCAGCTGGACCTT  
V28 (1) -----TCCACCAGGAGCAGCTGGACCTT

TP02\_0140 AT---CCAGGTGGTTATGCTGGCCAACCTGGTCCTTATGGT-----  
XM\_760370 AT---CCAGGTGGTTATGCTGGCCAACCTGGTCCTTATGGT-----  
V1 (3) AT---CCAGGTGGTTATGCTGGCCAACCTGGTCCTTATGGT-----  
V2 (3) -----

V3 (2) ATGGACAAGCAGGTTATGTCGGTCAACCGGGAGC-----  
 V4 (3) ATGGACAAGCAGGTTATGTCGGTCAACCGGGAGC-----  
 V5 (1) ATC---CAGGCGGTTACCCAAGTCAACAAGGAGGACCTGGAGCAT-----  
 V6 (2) ACG---GAGGTGGTTACCCAAGTCAACCAGGAGCATCTGGAGGTT-----  
 V7 (1) -----GGTGGTTATGCTGGTCAACCGGGAGC-----  
 V8 (1) ATGGACAAGCAGGTTATGTCGGTCAACCGGGAGCTGCTGGAGGTTATCCAGGTGGTTATG  
 V9 (1) ACG---GAGGCGGTTATCCAAGTCAACAAGGAGGACCTGGTTATC-----  
 V10 (1) AT---CCAGGTGGTTATACTGGTCAACCAGGAGC-----  
 V11 (1) AT---CCAGGTGGTTATCCCACTCAACCAGGAGC-----  
 V12 (1) AT---CCAGGTGGTTATACTGGTCAACCAGGAGC-----  
 V13 (1) AT---CCAGGTGGTTATACTGGTCAACCAGGAGC-----  
 V14 (1) AT---CCAGGTGGTTATACTGGTCAACCAGGAGC-----  
 V15 (1) AT---CCAGGTGGTTATACTGGTCAACCAGGAGC-----  
 V16 (1) -----  
 V17 (1) AT---CCAGGTGGTTATACTGGTCAACCAGGAGC-----  
 V18 (2) AT---CCAGGTGGTTATACTGGTCAACCAGGAGC-----  
 V19 (1) ATG---GAGGCGGTTATCCTAGTCAGCAAGGGGC-----  
 V20 (1) AT---CCAGGTGGTTATGCTGGTCAACCGGGAGC-----  
 V21 (1) AT---CCGGCTGGTTATGCTGGTCAACCGGGAGC-----  
 V22 (1) ATGGACAAACGGGTTACGTTGGTCAACCGGGAGC-----  
 V23 (1) AT---CCAGGTGGTTATGCTGGTCAACCGGGAGC-----  
 V24 (1) ACG---GAGGTGGTTACCCAA-----  
 V25 (1) ACG---GAGGCGGTTATCCAAGTCAACAAGGAGGACCTGGTTATC-----  
 V26 (1) ACG---GAGGCGGTTACCCAAGTCAACAAGGAGCACCTGGAGCAT-----  
 V27 (1) ACG---GAGGCGGTTACCCAAGTCAACCACAAGGACCTGGGGTAT-----  
 V28 (1) ACG---GAGGCGGTTACCCAAGTCAACCACAAGGACCTGGGGTAT-----

TP02\_0140 -----CAACCAGGAGCTACTGGACCCTATGGACAAGC--AGGTTATGTCG  
 XM\_760370 -----CAACCAGGAGCTACTGGACCCTATGGACAAGC--AGGTTATGTCG  
 V1 (3) -----CAACCAGGAGCTACTGGACCCTATGGACAAGC--AGGTTATGTCG  
 V2 (3) -----  
 V3 (2) -----ATCTGGAGGTTACGGAGCCGGTTATTCTGGTCAAGGTGGTTATC  
 V4 (3) -----ATCTGGAGGTTACGGAGCCGGTTATTCTGGTCAAGGTGGTTATC  
 V5 (1) -----ATCC-----TCCACCGGCAGCAGCTGGAGGTCAAGGGCCGGCTT  
 V6 (2) -----ATGGAGGCGGTGCATCAGGTGGCGCTGGACCTTACGGAGGTGGTT  
 V7 (1) -----ATCTGGAGGTTACGGAGCCGGTTATTCTGGTCAAGGTGGTTATC  
 V8 (1) CTGGTCAACCGGGAGCATCTGGAGGTTACGGAGCCGGTTATTCTGGTCAAGGTGGTTATC  
 V9 (1) -----CACC-----TCCACCGGCAGCAGCTGGAGCTCAAGGACATGCTT  
 V10 (1) -----TACTGGAGGTTACGGAGCTGGTTATTCTGGTCAAGGTGGTTATC  
 V11 (1) -----GGTTGGAGGCTACGGAGGCGGTTATTCTGGTCAAGGTGGTTATC

V12 (1) -----GGTTGGAGGCTACGGACGCGGTTATTTCAGGTCAAGGTGGTTATC  
V13 (1) -----TACTGGAGGTTACGGAGCTGGTTATTTCAGGTCAAGGTGGTTATC  
V14 (1) -----TACTGGAGGTTACGGAGCTGGTTATTTCAGGTCAAGGTGGTTATC  
V15 (1) -----TACTGGAGGTTACGGAGCTGGTTATTTCAGGTCAAGGTGGTTATC  
V16 (1) -----  
V17 (1) -----TACTGGAGGTTACGGAGCTGGTTATTTCAGGTCAAGGTGGTTATC  
V180 (2) -----TACTGGAGGTTACGGAGCTGGTTATTTCAGGTCAAGGTGGTTATC  
V19 (1) -----AACTGGCGGATTTCGG---TGGCTATCCGAGTCAATCAGG-----  
V20 (1) -----ATCTGGAGGTTACGGAGCCGGTTATTCTGGTCAAGGTGGTTATC  
V21 (1) -----ATCTGGAGGTTACGGAGCCGGTTATTCTGGTCAAGGTGGTTATC  
V22 (1) -----ATCTGGAGGTTACGGAGCTGGTTATTTCAGGTCAAGGTGGTTATC  
V23 (1) -----ATCTGGAGGTTACGGAGCAGGTTATTCTGGTCAAGGTGGTTATC  
V24 (1) -----  
V25 (1) -----CACC-----TCCACCGGCAGCAGCTGGAGCTCAAGGACATGCTT  
V26 (1) -----ATCC-----TCCACCTGCAGCCGCTGGAGCTCAAGGGCCGGCTT  
V27 (1) -----ATCC-----TCCACCAGGAGCAGCTGGACCTTACGGAGGCGGTT  
V28 (1) -----ATCC-----TCCACCAGGAGCAGCTGGACCTTACGGAGGCGGTT

TP02\_0140 GTCAACCGGGAGCTGCTGGGGGTTATCCAGGTGGTTATCCTCCACCAGGAGCA-----  
XM\_760370 GTCAACCGGGAGCTGCTGGGGGTTATCCAGGTGGTTATCCTCCACCAGGAGCA-----  
V1 (3) GTCAACCGGGAGCTGCTGGGGGTTATCCAGGTGGTTATCCTCCACCAGGAGCA-----  
V2 (3) -----  
V3 (2) CTCCACAAGGTTATGGACAACCCGGGCAAGGTCCTTATCCTCCGCCAGGAGCA-----  
V4 (3) CTCCACAAGGTTATGGACAACCCGGGCAAGGTCCTTATCCTCCGCCAGGAGCA-----  
V5 (1) ATCCTCCAGGCTATGGTCAACCGGGAGCAGCTGGAGGTTATGGAGGCGGTGCATCAGGTG  
V6 (2) ACCCA-----AGTCAACCAGGAGCATCTGGAGGTTATGGAGGCGGTGCATCAGGTG  
V7 (1) CTCCACAAGGTTACGTACAACCCGGGCAAGGTCCTTATCCTCCGTCAGGACCATCTGGAG  
V8 (1) CTCCACAAGGTTATGGACAACCCGGGCAAGGTCCTTATCCTCCGCCAGGAGCA-----  
V9 (1) ATCCTCCAGGCTATGGTCAACCGGTAGCAGCTGGAGGTTATGGAGGCGGTGCATCAGGTG  
V10 (1) CTCCACAAGGCTATGGACAACCCGGGCAAGGTCCTTATCCTCCGCCAGGACCATCTGGGG  
V11 (1) CACCACAAGGCTATGGACAACCCGGGAAAGGTCCTTATCCTCCGCCAGGACCATCTGGGG  
V12 (1) CACCACAAGGCTATGGACAACCCGGGAAAGGTCCTTATCCTCCGCCAGGACCATCTGGGG  
V13 (1) CTCCACAAGGCTATGGACAACCCGGGCAAGGTCCTTATCCTCCGCCAGGACCATCTGGGG  
V14 (1) CTCCACAAGGCTATGGACAACCCGGGCAAGGTCCTTATCCTCCGCCAGGACCATCTGGGG  
V15 (1) CTCCACAAGGCTATGGACAACCCGGGCAAGGTCCTTATCCTCCGCCAGGACCATCTGGGG  
V16 (1) -----  
V17 (1) CTCCACAAGGTTATGGACAACCCGGGCAAGGTCCTTATCCTCCGTCAGGACCATCTGGAG  
V180 (2) CTCCACAAGGTTATGGACAACCCGGGCAAGGTCCTTATCCTCCGTCAGGACCATCTGGAG  
V19 (1) ----ACAAGGC---GTTTATCCTCCACAAGGTCCTTATGCTCCACCCGGAGCAGCCGGAG  
V20 (1) CTCCACAAGGTTATGGACAACCCGGGCAAGGTCCTTATCCTCCGCCAGGAGCA-----

V21 (1) CTCCACAAGGTTATGGACAACCCGGGCAAGGTCCTTATCCTCCGTCAGGACCATCTGGAG  
V22 (1) CTCCACAAGGTTATGGACAACCCGGGCAAGGTCCTTATCCTCCGCCAGGAGCA-----  
V23 (1) CTCCACAAGGTTACGTACAACCCGGGCAAGGTCCTTATCCTCCGTCAGGACCATCTGGAG  
V24 (1) -----GTCAACCAGGAGCATCTGGAGGTTATGGAGGCGGTGCATCAGGTG  
V25 (1) ATCCTCCAGGCTATGGTCAACCCGGTAGCAGCTGGAGGTTATGGAGGCGGTGCATCAGGTG  
V26 (1) ATCCTCCAGGCTATGGTCAACCCGGTAGCATCTGGAGGTTATGGAGGCGGTGCATCAGGTG  
V27 (1) ACCCA-----AGTCAACCACAAGGACCTGGGGTATATCC-----TCCACCAGGAG  
V28 (1) ACCCA-----AGTCAACCACAAGGACCTGGGGTATATCC-----TCCACCAGGAG

TP02\_0140 -----GCTGGAGGCTATGGAGGCGGCCACCCGGTC---CAGGTCAGCCAA  
XM\_760370 -----GCTGGAGGCTATGGAGGCGGCCACCCGGTC---CAGGTCAGCCAA  
V1 (3) -----GCTGGAGGCTATGGAGGCGGCCACCCGGTC---CAGGTCAGCCAA  
V2 (3) -----  
V3 (2) -----GCTGGAGGCTATGGAGGTGGCCACCCGGTC---CAGGTCAGCCAA  
V4 (3) -----GCTGGAGGCTATGGAGGTGGCCACCCGGTC---CAGGTCAGCCAA  
V5 (1) GC-----GCTGGAGGCTACGGAGGTGGTTATCCAGGTCAACAAGGTGGTCCAC  
V6 (2) GC-----GCTGGAGGTTACGGAGGCGGTATCCAAGTCAACCAGGTGGTCCAC  
V7 (1) GCCATGGAGCAGGTGCTGGAGGCTATGGAGGCGGCGCACCCGGTC---CAGGTCAGCCAA  
V8 (1) -----GCTGGAGGCTATGGAGGTGGCCACCCGGTC---CAGGTCAGCCAA  
V9 (1) GC-----GCTGGAGGTTACGGAGGTGGTTATCCAAGTCAACCAGGTGGTCCAC  
V10 (1) GCTATGGAGCAGGTGCTGGAGGCTATGGAGGTAGTGCACCCGGTC---CAGGTCACCCAA  
V11 (1) GCTATGGATCAGGTGCTGGAGGCTATGGAGGCGGCGAACC GGTT---CAGGTCACCCAA  
V12 (1) GCTATGGATCACGTGCTGGAGGCTATGGAGGCGGCAAACC GGTT---CAGGTCACCCAA  
V13 (1) GCTATGGAGCAGGTGCTGGAGGCTATGGAGGTAGTGCACCCGGTC---CAGGTCACCCAA  
V14 (1) GCTATGGAGCAGGTGCTGGAGGCTATGGAGGCGGCGAACC GGTC---CAGGTCACCCAA  
V15 (1) GCTATGGAGCAGGTGCTGGAGGCTATGGAGGTAGTGCACCCGGTC---CAGGTCACCCAA  
V16 (1) -----  
V17 (1) GCCATGGAGCAGGTGCTGGAGGCTATGGAGGCGGCGCGCCTGGTC---CAGGTCAGCCAA  
V180 (2) GCCATGGAGCAGGTGCTGGAGGCTATGGAGGCGGCGCGCCTGGTC---CAGGTCAGCCAA  
V19 (1) GCTATGGTGGCGGTGCTGGCGGTTATGGCGGTGGCGCATCAGGTC---CAGGTCAGCCGA  
V20 (1) -----GCTGGAGGCTATGGAGGTGGCCACCCGGTC---CAGGTCAGCCAA  
V21 (1) GCCCTGGAGCAGGTGCTGGAGGTTATGGAGGTGGCGCACCCGGTC---CAGGTCAGCCAA  
V22 (1) -----GCTGGAGGATATGGAGGTGGCCACCCGGTC---CAGGTCAGCCAA  
V23 (1) GCCATGGAGCAGGTGCTGGAGGCTATGGAGGCGGCGCACCCGGTC---CAGGTCAGCCAA  
V24 (1) GC-----GCTGGACCTTACGGAGGTGGTTACCCAAGTCAACCAGGTGGTCCAC  
V25 (1) GC-----GCTGGAGGTTACGGAGGTGGTTATCCAAGTCAACCAGGTGGTCCAC  
V26 (1) GC-----GCTGGAGGTTACGGAGGTGGTTATCCAAGTCAACCAGGTGGTCCAC  
V27 (1) CA-----GCTGGACCTTACGGAGGCGGTATCCAAGTCAACCAGGTGGTCCAC  
V28 (1) CA-----GCTGGACCTTACGGAGGCGGTATCCAAGTCAACCAGGTGGTCCAC



TP02\_0140 GCGGTCCCCCTGGTCAAGCTCCTGGCAATATGCAATTGTTGAAAA-TAGATGTAAAAAAT  
 XM\_760370 GCGGTCCCCCTGGTCAAGCTCCTGGCAATATGCAATTGTTGAAAA-TAGATGTAAAAAAT  
 V1 (3) GCGGTCCCCCTGGTCAAGCTCCTGGCAATATGCAATTGTTGAAAA-TAGATGTAAAAAAT  
 V2 (3) -----  
 V3 (2) GCGGTCCCCCTGGTCAAGCTCCTGGCAATATGCAATTGTTGAAAA-TAGATGTAA-----  
 V4 (3) GCGGTCCCCCTGGTCAAGCTCCTGGCAATATGCAATTGTTGAAAA-TAGATGTAAAAAAT  
 V5 (1) AAGGAGCGGCTGGAC---CTCCTGGCGAGCCGATTATGGTAAAA-TGGATGCAAAAAGC  
 V6 (2) AAGGAGCAGCTGGAC---CTCCCGGCCAGCCGATTATGATGAGAA-TTGATGGGAAGAAC  
 V7 (1) GTGGCCACCTGGTCAAGCCCCTGGAGGGA---ATATGTTGAAAA-TAGATGCAAAAAGT  
 V8 (1) GCGGTCCCCCTGGTCAAGCTCCTGGCAATATGCAATTGTTGAAAA-TAGATGTAAAAAAT  
 V9 (1) AAGGAGCAGCTGGAC---CTCCTGGCCAGCCGATTATGATGAAAA-TTGATGTGAAGAAC  
 V10 (1) GCGGTCCCCTGGCCATGCTTCTGGCGGGA---ATTTGTTGAAAA-TAGATGTAAAAAAT  
 V11 (1) GCGGTCCCCTGGCCATGCTTCTGGCGGGA---ATTTGTTGAAAA-TAGATGTAAAAAAT  
 V12 (1) TCGATCCCCTGGCCATGCTTCTGGCGGGA---ATTTGTTGAAGA-TAGATGTAAAAAAT  
 V13 (1) GCGGTCCCCTGGCCATGCTTCTGGCGGGA---ATTTGTTGAAAA-TAGATGTAAAAAAT  
 V14 (1) GCGGTCCCCTGGCCATGCTTCTGGCGGGA---ATTTGTTGAAAAATAGATGTAAAAAAT  
 V15 (1) GCGGTCCCCTGGCCATGCTTCTGGCGGGA---ATTTGTTGAAAA-TAGATGTAAAAAAT  
 V16 (1) -----  
 V17 (1) GTGGCCCAACTGGTCAAACCCATGGAGGGA---ATATGTTGACAA-TAGATGCAAAAAC  
 V18 (2) GTGGCCCAACTGGTCAAACCCATGGAGGGA---ATATGTTGACAA-TAGATGCAAAAAC  
 V19 (1) CCGGTCTCCTGGCCATACTCCTGGGGTGA---ATTTGTTGACAA-TAGATGCAAAAAC  
 V20 (1) GCGGTCCCCCTGGTCAAGCTCCTGGCAATATGCAATTGTTGAAAA-TAGATGTAAAAAAT  
 V21 (1) GTGGCCACCTAGTCAATCTCCTGATGGGAAAAATTTAGGCCCTG-TAGATGGAAAAACA  
 V22 (1) GCGGTCCCCCTGGTCAAGCCCCTGGCAATATGCAATTGTTGACAA-TAGATGCAAAAAC  
 V23 (1) GTGGCCACCTGGTCAAGCCCCTGGAGGGA---ATATGTTGAAAA-TAGATGCAAAAAGT  
 V24 (1) AAGGAGCGGCTGGAC---CTCCTGGAGAGCCGATTATGCTGAAAA-TGGATGCAAGAAC  
 V25 (1) AAGGAGCAGCTGGAC---CTCCTGGCCAGCCGATTATGATGAAAA-TTGATGTGAAGAAC  
 V26 (1) AAGGAGCAGCTGGAC---ATCCTGGCCAGCCGATTATGATGAAAA-TTGATGCGAAGAAC  
 V27 (1) AAGGAGCAACTGGAC---CTCCTGGCCAGCCGATTATGATGAAAA-TTGATGCGAAGAAC  
 V28 (1) AGGGAGCAACTGGAC---CTCCTGGCCAGCCGATTATGATGAAAA-TTGATGCGAAGAAC

TP02\_0140 CCAAACAATGGTCCAAATATTATTTTTGAAGAATATATAGCCGGAAAGCCAGAACGTCGT  
 XM\_760370 CCAAACAATGGTCCAAATATTATTTTTGAAGAATATATAGCCGGAAAGCCAGAACGTCGT  
 V1 (3) CCAAACAATGGTCCAAATATTATTTTTGAAGAATATATAGCCGGAAAGCCAGAACGTCGT  
 V2 (3) -----  
 V3 (2) -----  
 V4 (3) CCAAACAATGGTCCAAATATTATTTTTGAAGAATATATAGCCGGAA-----  
 V5 (1) AGAGTAAAT---AGAGATATTAATCTTACTAAATTTTACACT---GACAAATGGTAAAACT  
 V6 (2) AGAAGAAAT---CCAAATACTAGACTTGATAGATTTTACACT---ACCAGATGGTAGAACT

V7 (1) CCAAACAATGGCAAAAATATTATTGTTGAAGAATTTAGAGCGGGTAGACCAGAACGTACT  
V8 (1) CCAAACAATGGTCCAAATATTATTTTTGAAGAATATATAGCCGGAAAGCCAGAACGTTCGT  
V9 (1) AGAAGAAAC---CCAAATACTAAACTTGATAGATTTTACACT---AACAGATGGTAGAACT  
V10 (1) CCAAACAATGGTCCAAA-----  
V11 (1) CCAAACAATGGTCCAAATATTATTTTTGAAGAATATATAGCCGGAAAGCCAGAACGTTCGT  
V12 (1) CCAAACAATGGTCCAAATATTATTTTTGAAGAATATATACCCA-----  
V13 (1) CCAAACAATGGTCCAAA-----  
V14 (1) CCAAACAATGGTCCAAA-----  
V15 (1) CCAAACAATGGTCCAAATATTATTTTTGAAGAATATATAGCC-----  
V16 (1) -----  
V17 (1) AAACACAATGGCCCAA-----  
V18 (2) AAACACAATGGCCCAAATATTATTGTTGACGAATATAGAGCCGGACCACAGGATCGTTCGT  
V19 (1) AAACACAATGGCGCAAATATTATTGTTGACGAATATAGAGCCGGTCGACCAGAACGTATT  
V20 (1) CCAAACAATGGTCCAAATATTATTTTTGAAGAATATATAGCCGGAAAGCCAGAACGTTCGT  
V21 (1) GGAAAAACGATCCATTTGTTATTTTTCGAAAGATTTAGGGCAGGACCACAAAATCGTGTT  
V22 (1) AAACACAATGGCGCAAATATTATTGTTGACGAATATAGAGCCGGTCGACCAGAACGTATT  
V23 (1) CCAAACAATGGCAAAAATATTATTGTTGAAGAATTTAGAGCGGGTAGACCAGAACGTACT  
V24 (1) AGAACAAAT---CGAAATATTAATCTTACTAAATTTACACT---ACCAAATGGTAAAAT  
V25 (1) AGAAGAAAC---CCAAATACTAAACTTGATAGATTTTACACT---AACAGATGGTAGAACT  
V26 (1) AGAAGAAAT---CCAAATACTAAACTTGATAGATTTTACACT---ATCAAATGGTGGAAT  
V27 (1) AGAAGAAAT---CCAAATACTAAACTTGATAGATTTTACGCT---ATCAAATGGTGGAAT  
V28 (1) AGAAGAGAT---CCAAATACTAAACTTGATAGATTTTACGCT---ATCAAATGGTGGAAT

TP02\_0140 CACCGTCAGTTTACCCCTGTTCCCTGGATGTGGAATTAATCAAGTAAATTATGACGGCGAA  
XM\_760370 CACCGTCAGTTTACCCCTGTTCCCTGGATGTGGAATTAATCAAGTAAATTATGACGGCGAA  
V1 (3) CACCGTCAGTTTACCCCTGTTCCCTGGATGTGGAATTAATCAAGTAAATTATGACGGCGAA  
V2 (3) -----  
V3 (2) -----  
V4 (3) -----  
V5 (1) CAACATGTGTTTATAGAGCTAATCCTGGACATGGAATTAACAAGTAAATTATGACGGTGAT  
V6 (2) CAACATGTGTTTATAGACCTAATCTTGGATATGCAATTAACAAGTAAATTATGACGGTGAT  
V7 (1) CACCGTCAGTTTACCCCTGTTCCCTGGATGTGGAATTAATCAAGTAAATTA-----  
V8 (1) CACCGTCAGTTTACCCCTGTTCCCTGGATGTGGAATTAATCAAGTAAATTATGACGGCGAA  
V9 (1) CAACATGCGTTTATAGAGCTAATCCTGGATATGCAATTAACAAGTAAATTATGACGGTGAT  
V10 (1) -----  
V11 (1) CACCGTCAGTTTACCCCTGTTCCCTGGATGTGGAATTAATCAAGTAAATTATGACGGCGAA  
V12 (1) -----  
V13 (1) -----  
V14 (1) -----  
V15 (1) -----

V16 (1) -----  
V17 (1) -----  
V18 (2) CACCGTCAGTTTGGATCCTGTTCCCTGGATGTGGAATTATTCAAGTAAATTATGACGGTCGC  
V19 (1) CACCGTCAGTTTGGATCCTGTTCCCTGGATGTGGAATTAATCAAGTAAATTATAATGGTAAA  
V20 (1) CACCGTCAGTTTACCCCTGTTCCCTGGATGTGGAATTAATCAAGTAAATTATGACGGTGGT  
V21 (1) CACCATCAGTATACTCCCCGTAGTGGTTGTGGGTTCAATATGGTAAAATATTCAGGTGGA  
V22 (1) CACCGTCAGTTTGGATCCTGTTCCCTGGATGTGGAATTAATCAAGTAAATTATAATGGTCAA  
V23 (1) CACCGTCAGTTTACCCCTGTTCCCTGGATGTGGAATTAATCAAGTAAATTATGACGGTCGC  
V24 (1) CAACATGTGTTTAGAGCTAATCCTGGACATGGAATTAACAAGTAAATTATGACGGTGAT  
V25 (1) CAACATGCGTTTAGAGCTAATCCTGGATATGCAATTAACAAGTAAATTATGACGGTGAT  
V26 (1) CAACATGTGTTTAGACCTGATCCTGGACATGGAATTAACAAGTAAATTATGACGGTGAT  
V27 (1) CAACATGTGTTTAGACCTGATCCTGGACATGGAATTAACAAGTAAATTATGACGGTGAT  
V28 (1) CAACATGTGTTTAGACCTGATCCTGGACATGGAATTAACAAGTAAATTATGACGGTGAT

TP02\_0140 AAAGTTTGGTCATTAGAAGTGGGTG---GCGATTATGCAGTAAAAGTTCTTGTTCCT  
XM\_760370 AAAGTTTGGTCATTAGAAGTGGGTG---GCGATTATGCAGTAAAAGTTCTTGTTCCT  
V1 (3) AAAGTTTGGTCATTAGAAGTGGGTG---GCGATTATGCAGTAAAAGTTCTTGTTCCT  
V2 (3) -----  
V3 (2) -----  
V4 (3) -----  
V5 (1) CCTGTTTGGTCAATGGATGGTAAT-----AATTTTGGAACAGAAGTTCTTCTGGATCCT  
V6 (2) CGTGTTTGGTCAATGGATGAT-----  
V7 (1) -----  
V8 (1) AAAGTTTGGTCATTAGAAGTGGGT-----GGCGATTATGCAGTAAAAGTTCTTGTTCCT  
V9 (1) CGTGTTTGGTCAATGGATGGTGGT-----AATTTTGGAACAGAAGTTCTTGTGGATCCT  
V10 (1) -----  
V11 (1) AAAGTTTGGT-----  
V12 (1) -----  
V13 (1) -----  
V14 (1) -----  
V15 (1) -----  
V16 (1) -----  
V17 (1) -----  
V18 (2) AAAGTTTGGACAGCGAGTGGTCCC-----GAACATGCAGTAAAAGTAGTTGTGTTTCCT  
V19 (1) CCAGTTTGGAAAATGATAGGTGAA-----AAATATGCAGTAAAAGTAGTTCTGTTTCCT  
V20 (1) AACGTTTGGACAATGAACGATGAC-----ATTCATGCATTAAGTAGTTGTGTTTCCT  
V21 (1) ATCGTTTGGATATTAGGGGGTGACGGTAGTAATTATGCAACAAAGGTTATTGTGCATCCT  
V22 (1) CCAGTTTGGAAAATGATAGGTGAA-----AAATATGCAGTAACAGTAGTTTTGTTTCCT  
V23 (1) AAAGTTTGGTCATTAGAAGTGGGTGGCGATCATGCAGTAAAAGTTCTTGTGTTTCCTATA  
V24 (1) TTTGTTTGGTCAATGGATGGTGGT-----AATTTTGGAACAGAAGTTCTTGTGGATCCT

V25 (1) CGTGTGGTCAATGGATGGTGGT-----AATTTTGGAACAGAAGTTCTTGTGGATCCT  
V26 (1) CGTGTGGTCAATGGATCGTGAT-----AATTTTGGCACAGAAGTTCTTGTAGATCCT  
V27 (1) CCTGTGGTCAATGGATGGTAAT-----AATTTTGGAACAGAAGTTCTTCTGGATCCT  
V28 (1) CCTGTGGTCAATGGATGGTAAT-----AATTTTGGAACAGAAGTTCTTCTGGATCCT

TP02\_0140 ATAGGGTTTAAAGAAAAAACTATTGAAATCACATTTATTGGCGGTGAAAAGGAAATCTAT  
XM\_760370 ATAGGGTTTAAAGAAAAAACTATTGAAATCACATTTATTGGCGGTGAAAAGGAAATCTAT  
V1 (3) ATAGGGTTTAAAGAAAAAACTATTGAAATCACATTTATTGGCGGTGAAAAGGAAATCTAT  
V2 (3) -----  
V3 (2) -----  
V4 (3) -----  
V5 (1) ATAGGGTCTCCAGCAAAAAATATGACAATCAAACGGCAAACGGTGATAAGGTTACTTTT  
V6 (2) -----  
V7 (1) -----  
V8 (1) CCTATAGGGTTTAAAGAAAAAACTATTGAAATCACATTTATTGGCGGTGAAAAGGAAATC  
V9 (1) ATAGGGTCTGGAGCAAAAACTATGACAATCAAACGGCAAACGG-----  
V10 (1) -----  
V11 (1) -----  
V12 (1) -----  
V13 (1) -----  
V14 (1) -----  
V15 (1) -----  
V16 (1) -----  
V17 (1) -----  
V18 (2) CTAGGATTTAAAGAAAAAACTATTGAAATCACATTTATTGGCGGTGAAAAGGCGATCTAT  
V19 (1) ATAGGATTTGAAGAAAAAACTATTGTAATCACAATGATAGGTGGTAAAACGAGATCTAT  
V20 (1) ATAGGGTTTAAAGAAAAAACTATTGAAATCACATTTATTGGCGGTGAAAAGGAAATCTAT  
V21 (1) GTAGGGTTTAAAGAAAAAACTATTGAAATCACATTTATTGGCGGTGAAAAGGAGATCTAT  
V22 (1) ATAGGGTTTGAAGAAAAAACTATTGTAATCACAATGATAGGTGGTAAAAGGAGATCTAT  
V23 (1) GGGTTTAAAGAAAAAACTATTGAAATCACATTTATTGGCGGTGAAAAGGAGATCTATAAA  
V24 (1) ATAGGGTCTGGAGCAAAAACTATGACAATCAAATTGGCAAACGGTGATAAGGTTATTCAT  
V25 (1) ATAGGGTCTGGAGCAAAAACTATGACAATCAAACGGCAAACGGTGATAATGTTATTTAT  
V26 (1) ATAGGGTCTGGAGCAAAAACTATGACAATCAAATGGTAAACGGTGATGAGGTTACTTTT  
V27 (1) ATAGGGTCTCCAGCAAAAAATATGACAATCAAATGGTAAACGGTGATAAGGAAATCTAT  
V28 (1) ATAGG-TCTCCAGCAAAAA-TATGACA-TCAAATTTATTGGCGGTGAAAAGGAAATCTAT

TP02\_0140 AAAAAGAAAGGGCGTAATAAACCATGGACAAAACAATAA  
XM\_760370 AAAAAGAAAGGGCGTAATAAACCATGGACAAAACAATAA  
V1 (3) AAAAAGAAAGGG-----

|         |                                                       |
|---------|-------------------------------------------------------|
| V2 (3)  | -----                                                 |
| V3 (2)  | -----                                                 |
| V4 (3)  | -----                                                 |
| V5 (1)  | <i><b>ATAAAGAAAGGG</b></i> -----                      |
| V6 (2)  | -----                                                 |
| V7 (1)  | -----                                                 |
| V8 (1)  | <i><b>TATAAAAAGAAAGGG</b></i> -----                   |
| V9 (1)  | -----                                                 |
| V10 (1) | -----                                                 |
| V11 (1) | -----                                                 |
| V12 (1) | -----                                                 |
| V13 (1) | -----                                                 |
| V14 (1) | -----                                                 |
| V15 (1) | -----                                                 |
| V16 (1) | -----                                                 |
| V17 (1) | -----                                                 |
| V18 (2) | <i><b>AAAAAGCCAGGGCGTAATAAACCATGGACAAAACAATAA</b></i> |
| V19 (1) | <i><b>AAAAAGAAAGGG</b></i> -----                      |
| V20 (1) | <i><b>AAAAAGAAAGGGCGTAATAAACCATGGACAAAACAATAA</b></i> |
| V21 (1) | <i><b>AAAAAGAAAGGG</b></i> -----                      |
| V22 (1) | <i><b>AAAAAGAAAGGGCGTAATAAACCATGGACAAAACAATAA</b></i> |
| V23 (1) | <i><b>AAGAAAGGG</b></i> -----                         |
| V24 (1) | <i><b>ACAAAGCCAGGA</b></i> -----                      |
| V25 (1) | <i><b>ACAAAGCCAGGA</b></i> -----                      |
| V26 (1) | <i><b>ACAAAGTCAGGA</b></i> -----                      |
| V27 (1) | <i><b>AAAAAGAAAGGG</b></i> -----                      |
| V28 (1) | <i><b>AAAAAGAAAGGGCGTAATAAACCATGGACAAAACAATAA</b></i> |

Primer regions are in bold, underlined and italicized text.

Table S11b: Tp9 protein variant Clustal alignment

```

TP02_0895      MNVLTTGIILYSFYLSICMDP---DDDVFGFDPDDDDGSGSMLPPHQSSMFRDDLGSSTFT
V1 (3)         MNVLTTGIILYSFYLSICMDP---DDDVFGFDPDDDDGSGSMLPPHQSSMFRDDLGSSTFT
V2 (1)         -----ICMDSGEEEDDVFGAE-----GGSMLPPRQRSSMFGEPLGSLLT
V3 (1)         -----DVFGAE-----GGSMLPPRQRSSMFGEPLGSLHT
V4 (3)         -----ICMDSGEEEDDVFGAE-----GGSMLPPRQRSSMFGEPLGSLHT
V5 (2)         -----TSKDSGDDDDVFGAA-----GGSMLPPRQRSSPMFSGGLGSSFT
V6 (2)         MNVLTTGIILYSFYMSICMDP-DDNDDVFGDD-----EGSMLPKHQSSMLGSGLGSTFT
V7 (1)         MNVLTTGIILYSFYMSICMDTDEEDDDVFGDP-----GGSMLPPRQRSSVFSGGLGSTFT
V8 (1)         -----LAVDSDDDDVFGAA-----GGSMLPPRQRSSMFSEPLGSTFT
V9 (1)         MNVLTTGIILFSFYTCLCMTS---DDDVFGAD-----DGSMLPPHQSSMFSEPLGSLHT
V10 (1)        -----IILYSFYTCLCMTDPPDDDD--AFGDD-----GGSMLPEHKPFSMISGGLGSSHT
V11 (1)        MNVLTTGIILYSFYTCLCMNSDDDDDDAFGAE-----GGSMLPRHKRSSMFSEPLGSTFT
V12 (1)        MNVLTTGIILYSFYTCLCMNSDDDDDDAFGAE-----GGSMLPRHKRSSMFSEPLGSTFT
V13 (1)        MNVLTTGIILYSFYLSICMDTGDDDD-VFGAD-----GGSMLPRHQSSVFSGGLGETFT
V14 (1)        MNVLTTGIILYSFYLSICMDTGDDDD-VFGAD-----GGSMLPRHQSSVFSGGLGETFT
V15 (2)        -----AAEDPGEEDDVFGAE-----GGSMLPPHQSSMLGSGLGSTFT
V16 (1)        -----AAEDPGEEDDVFGAE-----GGSMLPPHQSSMLGSGLGSTIT
V17 (2)        -----VCKDTGDDDD-VFGDD-----GGSMLTPHQSSMFRDDLGSSTFT
V18 (1)        -----VTVDP-DDNDDVFGDD-----EGSMLPKHQSSMLGSGLGSTFT
V19 (1)        -----LAVDSDDDDVFGAA-----GGSMLPPRQRSSPMFSGGLGSSFT
V20 (1)        MNVLTTGIILYSFYQICMDSGDDDDVFGAA-----GGSMLPPRQRSSPMFSGGLGSSFT
V21 (1)        MNVLTTGIILYSFYLSICMDTGDD-DDVFGAP-----GGSMLPPRQRSSVFSGGIGSTFT
V22 (3)        MNVLTTGIILYSFYQICMDSGDDDDVFGAA-----GGSMLPPRQRSSPMFSGGLGSSFT
V23 (1)        -----FSVDPGEEEDDVFGAE-----GGSMLPPHQSSMLGSGLGSTFT
V24 (1)        -----SHQRSSMLGSGLGSTFT
V25 (1)        MNVLTTGIILYSFYQICMDSGDDDDVFGAA-----GGSMLPPRQRSSPMFSGGLGSSFT
V26 (1)        MNVLTTGIILYSFYLSICMD---PDDDVFGFDPDDDDGSGSMLPPHQSSIFSSDLGSTFT
V27 (1)        -----VRLVVRICICLDSGEEEDDVFGAE-----GGSMLPKHQSSMLGSGLGSTFT
*

TP02_0895      SGYTKQDLDAKFPGMKKSKGPKDKG----KPH--PTKPVKSTLMPG-----NDGQTGATG
V1 (3)         SGYTKQDLDAKFPGMKKSKGPKDKG----KPH--PTKPVKSTLMPG-----NDGQTGATG
V2 (1)         GGYGDEEFENKFKSMGIGKPKDKG----KPH--PTKPVKSTLMP-----GNDGQTG
V3 (1)         GGYGDEEFENKFKSMGIGKPKDKG----KPH--PTKPVKSTLMP-----GNDGQTG
V4 (3)         GGYGDEEFENKFKSMGIGKPKDKG----KPH--PTKPVKSTLMP-----GNDGQTG
V5 (2)         SGYTRQELDAKFPGMKKGKSKDKG----QPK--LPKPVKSTLMP-----EGGQSGAVG
V6 (2)         SGYSDQEFDEKFQRMGIGKPKDKG----KPH--PTKPVKSTLMP-----EAGQSGAVG
V7 (1)         SGYSDQEFDEKFKHMRIGKPKDKK-----LGRTNQPQQGAPGAYPPPAAG

```

V8 (1) SGYSDDFEFEKFKRMGMKKKPKDK-----LGRTNQPP-----PGTVG  
V9 (1) GGYGDEEFENKFKHMRIGKKPKDK-----LGRTNQPP-----QPGAPG  
V10 (1) GGYDDDEFQRFQRMGIGKKPKDK-----LGRTNQPP-----PGAAG  
V11 (1) SGYSDDFEFEKFKRMGMKKKPKDK-----LGRTNQPP-----PGTVG  
V12 (1) SGYSDDFEFEKFKRMGMKKKPKDK-----LGRTNQPP-----PGASG  
V13 (1) SGYSDDFEFEKFKHMRIGKKPKDK-----LKRNTQPP-----PGPTG  
V14 (1) SGYSDDFEFEKFKHMRIGKKPKDK-----LKRNTQPP-----PGPTG  
V15 (2) SGYSDDFEFEKFKRMGIGKKPKDKG---KPH--PTKPVKSTLMP-----EAGQSGAVG  
V16 (1) SGYSDDFEFEKFKRMGIGKKPKDKG---KPH--PTKPVKSTLMP-----EAGQSGAVG  
V17 (2) SGYTRQELDAKFPNLKARRGPIGK-----P--RGQPQ-----THQAAG  
V18 (1) SGYSDDFEFEKFKRMGIGKKPKDKG---KPH--PTKPVKSTLMP-----EAGQSGAVG  
V19 (1) SGYTRQELDAKFPGMKKGKSKDKAPWNNPPQ--PPKPVKSTLIP-----GDDVPQG  
V20 (1) SGYTRQELDAKFPGMKKGKSKDKAPWNNPPQ--PPKPVKSTLIP-----GDDVPQG  
V21 (1) SGYSDDFEFEKFKRMGIGKKPKDKG---KPH--PTKPVKSTLMP-----EAGQSGAVG  
V22 (3) SGYTRQELDAKFPGMKKGKSKDKG---QPK--LPKPVKSTLMP-----EGGQSGAVG  
V23 (1) SGYSDDFEFEKFKRMGIGKKPKDKG---KPH--PTKPVKSTLMP-----EAGQSGAVG  
V24 (1) SGYSDDFEFEKFKRMGIGKKPKDKG---KPH--PTKPVKSTLMP-----EAGQSGAVG  
V25 (1) SGYTRQELDAKFPGMKKGKSKDKAPWNNPPQ--PPKPVKSTLIP-----GDDVPQG  
V26 (1) TGYTCWDLNKFPMKKGKSKDKG---QPPQPPKPVKSTLMP-----ESGRPQ---  
V27 (2) SGYSDDFEFEKFKHMRIGKKPKDKG---KPH--PTKPVKSTLMP-----EAGQSGAVG  
\*\* : : : \*\* : : . \*

TP02\_0895 GYPGGYPTQGGPYQPGATGPGYQAGYVGGQ-----PGAVGPGYQPGAV-PYGQTG  
V1 (3) GYPGGYPTQGGPYQPGATGPGYQAGYVGGQ-----PGAVGPGYQPGAV-PYGQTG  
V2 (1) ---PTGP-YGQTYGPTQPGPYQPGATGG-----YQGGYPTQPGPYPPPGATGPGYQTN  
V3 (1) ---ATGP-YGQTYGPTQPGPYQPGATGG-----YQGGYPTQPGPYPPPGATGPGYQTS  
V4 (3) ---ATGP-YGQTYGPTQPGPYQPGPV-----  
V5 (2) GYGATGP-YGQAGYVGGQPGAAGN-----YPGGYAGQPGPYQPGATGPGYQAG  
V6 (2) GYGAAGP-YGQTYGQVGGQPGPYGQTYGQVGGQPGAVGPGYGGYPTQ-GPYGQPGAG-PYGQTG  
V7 (1) PYGGGYP--SQQGAPGAYPPPAAGPYGGYPSQQGAPGAYPPPAAGPYGGYPTQQA  
V8 (1) GYG-----QPGYPSQQA  
V9 (1) AYPPPAAGGFGGYPSQSGQG-----VYPPQG  
V10 (1) GYPGGYP--TQPGAAGGYPGGYPT-----QPGAAGGYPGGYPSQQA  
V11 (1) GYG-----QPGYPSQQA  
V12 (1) GYG-----  
V13 (1) GYGQPGY--PS-----QQAAGPYGGYPSQQA  
V14 (1) GYGQPGY--PS-----QQAAGPYGGYPSQQA  
V15 (2) GYGAAGP-YGQTYGQVGGQPGPYGQTYGQVGGQPGAVGPGYGGYPTQ-GPYGQPGAG-PYGQTG  
V16 (1) GYGAAGP-YGQTYGQVGGQPGPYGQTYGQVGGQPGAVGPGYGGYPTQ-GPYGQPGAG-PYGQTG  
V17 (2) GYGQPGQ--GPGVYP-----PPAAAGPYGGYPSQQA  
V18 (1) GYGAAGP-YGQTYGQVGGQPGPYGQTYGQVGGQPGAVGPGYGGYPTQ-GPYGQPGAG-PYGQTG

V19 (1) ---AVGP-YGG-GYPSQ-GPYGQPG-----AGPYGQTGYVGPYGG--  
V20 (1) ---AVGP-YGG-GYPSQ-GPYGQSG-----AGPYGQTGYVGPQPGYP  
V21 (1) GYGAAGP-YGQTGYVGPQPGPYGQTGYVGPQPGAVGPYGGGYPTQ-GPYGQPGAG-PYGQTG  
V22 (3) GYGATGP-YGQAGYVGPQGAAGN-----YPGGYAGQPGPYGQPGATGPYGQAG  
V23 (1) GYGAAGP-YGQTGYVGPQPGPYGQTGYVGPQPGAVGPYGGGYPTQ-GPYGQPGAG-PYGQTG  
V24 (1) GYGAAGP-YGQTGYVGPQPGPYGQTGYVGPQPGAVGPYGGGYPTQ-GPYGQPGAG-PYGQTG  
V25 (1) ---AVGP-YGG-GYPTQ-GPYGQPG-----AGPYGQTGYVGPYGGGY  
V26 (1) --GAAAG-Y-PAGYPTQ-GPYGQPGASGG-----YPAGYPTQPGPYVQPGATGPYRQTG  
V27 (2) GYGAAGP-YGQTGYVGPQPGPYGQTGYV-----

TP02\_0895 YPTQP-----GAAGGYPG-----GYAG  
V1 (3) YPTQP-----GAAGGYPG-----GYAG  
V2 (1) YPTQP-----GAAGGYPG-----GYPT  
V3 (1) YPTQP-----GAAGGYPG-----GYPT  
V4 (3) -----  
V5 (2) YVGP-----GAAGNYPGGYDGQPGPYGQPGATGPYGQAGYVG  
V6 (2) YPTQP-----GAAGGYPG-----GYTG  
V7 (1) PGAYP-----PPAAAGPYGG-----GYPS  
V8 (1) -----AGAYGG-----GYPT  
V9 (1) YVGP-----GAPGAYGG-----GYPS  
V10 (1) -----AGGYPG-----GYPS  
V11 (1) -----AGAYGG-----GYPT  
V12 (1) -----G-----GYPS  
V13 (1) PGVYP-----PPGAAGPYGG-----GYPS  
V14 (1) PGVYP-----PPGAAGPYGG-----GYPS  
V15 (2) YPTQP-----GAAGGYPG-----GYTG  
V16 (1) YPTQP-----GAAGGYPG-----GYTG  
V17 (2) SGGYGGG-----ASGGAGPYGG-----GYPS  
V18 (1) YPTQP-----GAAGGYPG-----GYTG  
V19 (1) -----GYPG-----GYAG  
V20 (1) PP-----GATGPYGQ-----TGYPG  
V21 (1) YPTQP-----GAAGNYPG-----GYAG  
V22 (3) YVGP-----GAAGNYPGGYDGQPGPYGQPGATGPYGQAGYVG  
V23 (1) YPTQP-----GAAGGYPG-----GYTG  
V24 (1) YPTQP-----GAAGGYPG-----GYTG  
V25 (1) PTQGPYGQPGAGPYGQTGYPTQPGAAGGYPG-----GYAG  
V26 (1) YPTQP-----GAAGGYPA-----GYAG  
V27 (2) -----



TP02\_0895 QPGPYGQPG---AT-GPYGQAGYVGP-----GAAGGYPGGYPPPG-----  
V1 (3) QPGPYGQPG---AT-GPYGQAGYVGP-----GAAGGYPGGYPPPG-----  
V2 (1) QPGAVGGYG---R--GYSGQGGYPPQ-----GYGQPGKGPYPPPG-----PSGGYGS  
V3 (1) QPGAVGGYG---G--GYSGQGGYPPQ-----GYGQPGKGPYPPPG-----PSGGYGS  
V4 (3) -----  
V5 (2) QPGASGGYG---A--GYSGQGGYPPQ-----GYGQPGQGPYPPPG-----  
V6 (2) QPGATGGYG---A--GYSGQGGYPPQ-----GYGQPGQGPYPPSG-----PSGGHGA  
V7 (1) QQGAPGAYP--PPAAAGAQQPAYPPG-----YGQPVASGGYGGG-----ASG  
V8 (1) QQGGPGYPP--PPAAAGAQQHAYPPG-----YGQPVAAGGYGGG-----ASG  
V9 (1) QQGATGGFG---GYPSQSGQGVYPPQ-----GYPAPPG-----AAGGYGG  
V10 (1) QQGGPGAYP--PPAAAGGQGPAYPPG-----YGQPGAAGGYGGG-----ASG  
V11 (1) QQGGPGYPP--PPAAAGAQQHAYPPG-----YGQPVAAGGYGGG-----ASG  
V12 (1) QPG-----ASGGYGGG-----ASG  
V13 (1) QPQGGPGVYP--PPGAAGPYGGGYPSQPQGGPGVYPPPGAAGPYGGGYPSQPQGGPGVYPPPG  
V14 (1) QPQGGPGVYP--PPGAAGPYGGGYPSQPQGGPGVYPPPGAAGPYGGGYPSQPQGGPGVYPPPG  
V15 (2) QPGATGGYG---A--GYSGQGGYPPQ-----GYGQPGQGPYPPPG-----PSGGYGA  
V16 (1) QPGATGGYG---A--GYSGQGGYPPQ-----GYGQPGQGPYPPPG-----PSGGYGA  
V17 (2) QPGASGGYGGGASGGAGPYGGGYPSQ-----PGASGGYGGG-----ASG  
V18 (1) QPGATGGYG---A--GYSGQGGYPPQ-----GYGQPGQGPYPPSG-----PSGGHGA  
V19 (1) QPGASGGYG---A--GYSGQGGYPPQ-----GYVQPGQGPYPPSG-----PSGGHGA  
V20 (1) QPGASGGYG---A--GYSGQGGYPPQ-----GYGQPGQGPYPPPG-----  
V21 (1) QPGASGGYG---A--GYSGQGGYPPQ-----GYGQPGQGPYPPPG-----  
V22 (3) QPGASGGYG---A--GYSGQGGYPPQ-----GYGQPGQGPYPPPG-----  
V23 (1) QPGATGGYG---A--GYSGQGGYPPQ-----GYGQPGQGPYPPPG-----PSGGYGA  
V24 (1) QPGATGGYG---A--GYSGQGGYPPQ-----GYGQPGQGPYPPPG-----PSGGYGA  
V25 (1) QPGASGGYG---A--GYSGQGGYPPQ-----GYVQPGQGPYPPSG-----PSGGHGA  
V26 (1) QPGASGGYG---A--GYSGQGGYPPQ-----GYGQPGQGPYPPSG-----PSGGPGA  
V27 (2) -----

TP02\_0895 AAGGYGGGPPG-PGQPSGPPGQAPGNMQLLKIDVKNPNNGPNII FEEYIAGKPERRHRQF  
V1 (3) AAGGYGGGPPG-PGQPSGPPGQAPGNMQLLKIDVKNPNNGPNII FEEYIAGKPERRHRQF  
V2 (1) RAGGYGGGKPG-SGHPIDPTGHASG-GNLLKIDVKNPNNGPNII FEEYIP-----  
V3 (1) GAGGYGGGEPG-SGHPSGPTGHASG-GNLLKIDVKNPNNGPNII FEEYIAGKPERRHRQF  
V4 (3) -----  
V5 (2) AAGGYGGGPPG-PGQPSGPPGQAPGNMQLLKIDV-----  
V6 (2) GAGGYGGGAPG-PGQPSGPTGQTHG-GNMLTIDAKTKHNGPNII VDEYRAGPQDRRHRQF  
V7 (1) GAGGYGGGYPSQPGGPQGAAG-HPGQPIMMKIDAKNRRN-PNTKLD RFTLSN-GGTQHVF  
V8 (1) GAGGYGGGYPSQPGGPQGAAG-PPGQPIMMKIDVKNRRN-PNTKLD RFTLTD-GRTQHAF  
V9 (1) GAGGYGGGASG-PGQPTGPPGHTPG-VNLLTIDAKTKHNGANI IVDEYRAGRPERIHRQF  
V10 (1) GAGGYGGGYPGQGGPQGAAG-PPGEPIMVKMDAKSRVN-RDINLT KFTLTN-GKTQHVF

V11 (1) GAGGYGGGYPSQPGGPQGAAG-PPGQPIMMKIDVKNRRN-PNTKLRFTLTD-GRTQHAF  
V12 (1) GAGPYGGGYPSQPGGPQGAAG-PPGEPIMLKMDAKNRTN-RNINLTKFTLPN-GKTQHVF  
V13 (1) AAGPYGGGYPSQPGGPQGATG-PPGQPIMMKIDAKNRRN-PNTKLRFTLSN-GGTQHVF  
V14 (1) AAGPYGGGYPSQPGGPQGATG-PPGQPIMMKIDAKNRRD-PNTKLRFTLSN-GGTQHVF  
V15 (2) GAGGYGGSAPG-PGHPSGPTGHASG-GNLLKIDVKNPNNGP-----  
V16 (1) GAGGYGGSAPG-PGHPSGPTGHASG-GNLLKIDVKNPNNGP-----  
V17 (2) GAGGYGGGYPSQPGGPQGAAG-PPGQPIMMRIDGKNRRN-PNTRLDRFTLPD-GRTQHVF  
V18 (1) GAGGYGGGAPG-PGQPSGPTGQTHG-GNMLTIDAKTKHNGP-----  
V19 (1) GAGGYGGGAPG-PGQPSGPPGQAPG-GNMLKIDAKSPNNGKNIIVEEFRAGRPERTHRQF  
V20 (1) AAGGYGGGPPG-PGQPSGPPGQAPGNMQLLTIDAKTKHNGANIIVDEYRAGRPERIHRQF  
V21 (1) AAGGYGGGPPG-PGQPSGPPGQAPGNMQLLKIDVKNPNNGPNIIFEEYIAGKPERRHRQF  
V22 (3) AAGGYGGGPPG-PGQPSGPPGQAPGNMQLLKIDVKNPNNGPNIIFEEYIAGKPERRHRQF  
V23 (1) GAGGYGGGEPG-PGHPSGPTGHASG-GNLLKNRCKKSKQWSK-----  
V24 (1) GAGGYGGSAPG-PGHPSGPTGHASG-GNLLKIDVKNPNNGPNIIFEEYIA-----  
V25 (1) GAGGYGGGAPG-PGQPSGPPGQAPG-GNMLKIDAKSPNNGKNIIVEEFRAGRPERTHRQF  
V26 (1) GAGGYGGGAPG-PGQPSGPPSQQSPDGKNLGPVDGKTGKNDPFVIFERFRAGPQNRVHHQY  
V27 (2) -----

TP02\_0895 TPVPGCGINQVNYDGEKVSLEVGG-DYAVKVLVFPPIGFKEKTIEITFIGGEKEIYKKKG  
V1 (3) TPVPGCGINQVNYDGEKVSLEVGG-DYAVKVLVFPPIGFKEKTIEITFIGGEKEIYKKKG  
V2 (1) -----  
V3 (1) TPVPGCGINQVNYDGEKVV-----  
V4 (3) -----  
V5 (2) -----  
V6 (2) DPVPGCGIIQVNYDGRKVVTA--SGPEHAVKVVVFLPLGFKEKTIEITFIGGEKAIYKKPG  
V7 (1) RPDPGHGIIKQVNYDGRVWSMDRD--NFGTEVLVDPIGSGAKTMTIKMVNGDEVTFKSG  
V8 (1) RANPGYAIKQVNYDGRVWSMDGG--NFGTEVLVDPIGSGAKTMTIKLAN-----  
V9 (1) DPVPGCGINQVNYNGKPVWKMIG--EKYAVKVVLFPIGFEEKTIVITMIGGENEYIYKKKG  
V10 (1) RANPGHGIIKQVNYDGDVPVWSMDGN--NFGTEVLLDPIGSPAKNMTIKLANGDKVTFIKKG  
V11 (1) RANPGYAIKQVNYDGRVWSMDGG--NFGTEVLVDPIGSGAKTMTIKLANGDNVIYTKPG  
V12 (1) RANPGHGIIKQVNYDGDVWWSMDGG--NFGTEVLVDPIGSGAKTMTIKLANGDKVIHTKPG  
V13 (1) RPDPGHGIIKQVNYDGDVPVWSMDGN--NFGTEVLLDPIGSPAKNMTIKMVNGDKEIYKKKG  
V14 (1) RPDPGHGIIKQVNYDGDVPVWSMDGN--NFGTEVLLDPIGLQOK-YDIKFIGGEKEIYKKKG  
V15 (2) -----  
V16 (1) -----  
V17 (2) RPNLGYAIKQVNYDGRVWSMDDD--NFATEVLV-----  
V18 (1) -----  
V19 (1) TPVPGCGINQVN-----  
V20 (1) DPVPGCGINQVNYNGQPVWK-MIG-EKYAVTVVLFPIGFEEKTIVITMIGGEKEIYKKKG  
V21 (1) TPVPGCGINQVNYDGGNVWMT--NDDIHALKVVVFPPIGFKEKTIEITFIGGEKEIYKKKG

|         |                                                               |
|---------|---------------------------------------------------------------|
| V22 (3) | TPVPGCGINQVN-----                                             |
| V23 (1) | -----                                                         |
| V24 (1) | -----                                                         |
| V25 (1) | TPVPGCGINQVNYDGRKVWS-LEVGGDHAVKVLVFPVIGFKEKTIEITFIGGEKEIYKKKG |
| V26 (1) | TPRSGCGFNMVKYSGGIVWILGGDGSNYATKVIVHPVGFKEKTIEITFIGGEKEIYKKKG  |
| V27 (2) | -----                                                         |

|           |          |
|-----------|----------|
| TP02_0895 | RNKPWTKQ |
| V1 (3)    | RNKPWTKQ |
| V2 (1)    | -----    |
| V3 (1)    | -----    |
| V4 (3)    | -----    |
| V5 (2)    | -----    |
| V6 (2)    | RNKPWTKQ |
| V7 (1)    | RNKPWTKQ |
| V8 (1)    | -----    |
| V9 (1)    | RNKPWTKQ |
| V10 (1)   | -----    |
| V11 (1)   | RNKPWTKQ |
| V12 (1)   | RNKPWTKQ |
| V13 (1)   | RNKPWTKQ |
| V14 (1)   | RNKPWTKQ |
| V15 (2)   | -----    |
| V16 (1)   | -----    |
| V17 (2)   | -----    |
| V18 (2)   | -----    |
| V19 (1)   | -----    |
| V20 (1)   | RNKPWTKQ |
| V21 (1)   | RNKPWTKQ |
| V22 (3)   | -----    |
| V23 (1)   | -----    |
| V24 (1)   | -----    |
| V25 (1)   | RNKPWTKQ |
| V26 (1)   | RNKPWTKQ |
| V27 (2)   | -----    |

Eptiope region highlighted in grey.

Table S12a: Tp10 nucleotide variant Clustal alignment

|                     |                                                                          |     |
|---------------------|--------------------------------------------------------------------------|-----|
| Tp04_0772 (genomic) | ATGAAGGTCACAAATCTCAAGTGGAAATCCAACCTGTT <u>GACTACGCTCTTCTTACCAC</u> TTTCT | 60  |
| XP_764408 (mRNA)    | ATGAAGGTCACAAATCTCAAGTGGAAATCCAACCTGTTGACTACGCTCTTCTTACCACCTTCT          | 60  |
| V1 (3)              | -----                                                                    | 0   |
| V2 (1)              | -----                                                                    | 0   |
| V3 (1)              | -----                                                                    | 0   |
| V4 (1)              | -----                                                                    | 0   |
| V5 (1) *            | -----                                                                    | 0   |
| V6 (2)              | -----                                                                    | 0   |
| V7 (1)              | -----                                                                    | 0   |
| V8 (1)              | -----                                                                    | 0   |
| V9 (1) *            | -----                                                                    | 0   |
| V10 (5)             | -----                                                                    | 0   |
| V11 (3)             | -----                                                                    | 0   |
| V12 (1)             | -----                                                                    | 0   |
| V13 (1) *           | -----                                                                    | 0   |
|                     |                                                                          |     |
| Tp04_0772 (genomic) | TTCGACTGTACAGCTAAAGTCTGGTAAGAAAAAAAAATTTTCTAAAAAATTTAGGGACGCG            | 120 |
| XP_764408 (mRNA)    | TTCGACTGTACAGCTAAAGTCTG-----GGACGCG                                      | 90  |
| V1 (3)              | -----GGGACGCG                                                            | 8   |
| V2 (1)              | -----GGGACGCT                                                            | 8   |
| V3 (1)              | -----GGGACGCG                                                            | 8   |
| V4 (1)              | -----                                                                    | 0   |
| V5 (1) *            | -----GGGACGCG                                                            | 8   |
| V6 (2)              | -----GGGACGCG                                                            | 8   |
| V7 (1)              | -----GGGACGCG                                                            | 8   |
| V8 (1)              | -----GGGACGCG                                                            | 8   |
| V9 (1) *            | -----GGGACGCG                                                            | 8   |
| V10 (5)             | -----GGGACGCG                                                            | 8   |
| V11 (3)             | -----GGGACGCG                                                            | 8   |
| V12 (1)             | -----GGGACGCG                                                            | 8   |
| V13 (1) *           | -----                                                                    | 0   |
|                     |                                                                          |     |
| Tp04_0772 (genomic) | TCAAATGGCAAAGAACTATTTTCAACCTCAATTGGTGAGCATCCTTCTTCATGCTCCTGG             | 180 |
| XP_764408 (mRNA)    | TCAAATGGCAAAGAACTATTTTCAACCTCAATTGGTGAGCATCCTTCTTCATGCTCCTGG             | 150 |
| V1 (3)              | TCAAATGGCAAAGAACTATTTTCAACCTCAATTGGTGAGCATCCTTCTTCATGCTCCTGG             | 68  |

|           |                                                               |    |
|-----------|---------------------------------------------------------------|----|
| V2 (1)    | TCAAATGGCAAAGAACTATTTTTCAACCTCAATTGGTGAGCATCCTTCTTCATGCTCCTGG | 68 |
| V3 (1)    | TCAAATGGCAAAGAACTATTTTTCAACCTCAATTGGTGAGCACCTTCTTCATGCTCCTGG  | 68 |
| V4 (1)    | -----TCAACCTCAATTGGTGAGCACCTTCTTCATGCTCCTGG                   | 39 |
| V5 (1) *  | TCAAATGGCAAAGAACTATTTTTCAACCTCAATTGGTGAGCACCTTCTTCATGCTCCTGG  | 68 |
| V6 (2)    | TCAAATGGCAAAGAACTATTTTTCAACCTCAATTGGTGAGCACCTTCTTCATGCTCCTGG  | 68 |
| V7 (1)    | TCAAATGGCAAAGAACTATTTTTCAACCTCAATTGGTGAGCATCCTTCTTCATGCTCCTGG | 68 |
| V8 (1)    | TCAAATGGCAAAGAACTATTTTTCAACCTCAATTGGTGAGCATCCTTCTTCATGCTCCTGG | 68 |
| V9 (1) *  | TCAAATGGCAAAGAACTATTTTTCAACCTCAATTGGTGAGCATCCTTCTTCATGCTCCTGG | 68 |
| V10 (5)   | TCAAATGGCAAAGAACTATTTTTCAACCTCAATTGGTGAGCATCCTTCTTCATGCTCCTGG | 68 |
| V11 (3)   | TCAAATGGCAAAGAACTATTTTTCAACCTCAATTGGTGAGCATCCTTCTTCATGCTCCTGG | 68 |
| V12 (1)   | TCAAATGGCAAAGAACTATTTTTCAACCTCAATTGGTGAGCATCCTTCTTCATGCTCCTGG | 68 |
| V13 (1) * | -----                                                         | 0  |

|                     |                                                              |     |
|---------------------|--------------------------------------------------------------|-----|
| Tp04_0772 (genomic) | ACACCTAACGGGTACTTTAAGTTTGGAAATTAATGTAATTTAGAGACAAGATTTTAGTTT | 240 |
| XP_764408 (mRNA)    | ACACCTAACGG-----AGACAAGATTTTAGTTT                            | 178 |
| V1 (3)              | ACACCTAACGGGTACTTTAAGTTTGGAAATTAATGTAATTTAGAGACAAGATTTTAGTTT | 128 |
| V2 (1)              | ACACCTAACGGGTACTTTAAGTTTGGAAATTAATGTAATTTAGAGACAAGATTTTAGTTT | 128 |
| V3 (1)              | ACACCTAACGGGTACTTTAAGTTTGGAAATTAATGTAATTTAGAGACAAGATTTTAGTTT | 128 |
| V4 (1)              | ACACCTAACGGGTACTTTAAGTTTGGAAATTAATGTAATTTAGAGACAAGATTTTAGTTT | 99  |
| V5 (1) *            | ACACCTAACGGGTACTTTAAGTTTGGAAATTAATGTAATTTAGAGACAAGATTTTAGTTT | 128 |
| V6 (2)              | ACACCTAACGGGTACTTTAAGTTTGGAAATTAATGTAATTTAGAGACAAGATTTTAGTTT | 128 |
| V7 (1)              | ACACCTAACGGGTACTTTAAGTTTGGAAATTAATGTAATTTAGAGACAAGATTTTAGTTT | 128 |
| V8 (1)              | ACACCTAACGGGTACTTTAAGTTTGGAAATTAATGTAATTTAGAGACAAGATTTTAGTTT | 128 |
| V9 (1) *            | ACACCTAACGGGTACTTTAAGTTTGGAAATTAATGTAATTTAAAGACAAAATTTTAGTTT | 128 |
| V10 (5)             | ACACCTAACGGGTACTTTAAGTTTGGAAATTAATGTAATTTAGAGACAAGATTTTAGTTT | 128 |
| V11 (3)             | ACACCTAACGGGTACTTTATGTTTGGAAATTAATGTAATTTAGAGACAAGATTTTAGTTT | 128 |
| V12 (1)             | ACACCTAACGGGTACTTTATGTTTGGAAATTAATGTAATTTAGAGACAAGATTTTAGTTT | 128 |
| V13 (1) *           | ---CCTAACGGGTACTTTAAGTTTGGAAATTAATGTAATTTAGAGACAAGATTTTAGTTT | 57  |

\*\*\*\*\*

|                     |                                                              |     |
|---------------------|--------------------------------------------------------------|-----|
| Tp04_0772 (genomic) | CAACCAAAGAAGCGAATGTATCATTAATTGACCCGAGATCAGGAAATTGTTGTAGCAAGT | 300 |
| XP_764408 (mRNA)    | CAACCAAAGAAGCGAATGTATCATTAATTGACCCGAGATCAGGAAATTGTTGTAGCAAGT | 238 |
| V1 (3)              | CAACCAAAGAAGCGAATGTATCATTAATTGACCCGAGATCAGGAAATTGTTGTAGCAAGT | 188 |
| V2 (1)              | CAACCAAAGAAGCAAATGTATCATTAATTGACCCGAGATCAGGAAATTGTTGTAGCAAGT | 188 |
| V3 (1)              | CAACCAAAGAAGCTAATGTATCATTAATTGACCCGAGATCAGGAAATTGTTGTAGCAAGT | 188 |
| V4 (1)              | CAACCAAAGAAGCGAATGTATCATTAATTGACCCGAGATCAGGAAATTGTTGTAGCAAGT | 159 |
| V5 (1) *            | CAACCAAAGAAGCGAATGTATCATTAATTGACCCGAGATCAGGAAATTGTTGTAGCAAGT | 188 |
| V6 (2)              | CAACCAAAGAAGCGAATGTATCATTAATTGACCCGAGATCAGGAAATTGTTGTAGCAAGT | 188 |
| V7 (1)              | CAACCAAAGAAGCGAATGTATCATTAATCGACCCGAGATCAGGAAATTGTTGTATCAAGT | 188 |
| V8 (1)              | CAACCAAAGAAGCGAATGTATCATTAATCGACCCGAGATCAGGAAATTGTTGTATCAAGT | 188 |

|                     |                                                                       |     |
|---------------------|-----------------------------------------------------------------------|-----|
| V9 (1) *            | CAACCAAAGAAGCGAATGTATCATTAATTGACCCGAGATCAGGAAATTGTTGTAGCAAGT          | 188 |
| V10 (5)             | CAACCAAAGAAGCGAATGTATCATTAATTGACCCGAGATCAGGAAATTGTTGTAGCAAGT          | 188 |
| V11 (3)             | CAACCAAAGAAGCGAATGTATCATTAATTGACCCGAGATCAGGAAATTGTTGTAGCAAGT          | 188 |
| V12 (1)             | CAACCAAAGAAGCGAATGTATCATTAATTGACCCGAGATCAGGAAATTGTTGTAGCAAGT          | 188 |
| V13 (1) *           | CAACCAAAGAAGCGAATGTATCATTAATTGACCCGAGATCAGGAAATTGTTGTAGCAAGT<br>***** | 117 |
|                     |                                                                       |     |
| Tp04_0772 (genomic) | ATAAGGCTCACGACTCTAATAAGTTGACAAGTGCTTTATGGCTTGGAGGACATTACGGAG          | 360 |
| XP_764408 (mRNA)    | ATAAGGCTCACGACTCTAATAAGTTGACAAGTGCTTTATGGCTTGGAGGACATTACGGAG          | 298 |
| V1 (3)              | ATAAGGCTCACGACTCTAATAAGTTGACAAGTGCTTTATGGCTTGGAGGACATTACGGAG          | 248 |
| V2 (1)              | ATAAGGCTCACGACTCTAATAAGTTGACAAGTGCTTTATGGCTTGGAGGACATTACGGAG          | 248 |
| V3 (1)              | ATAAGGCTCACGACTCTAATAAGTTGACAAGTGCTTTATGGCTTGGAGGACATTACGGAG          | 248 |
| V4 (1)              | ATAAGGCTCACGACTCTAATAAGTTGACAAGTGCTTTATGGCTTGGAGGGCATTACGGAG          | 219 |
| V5 (1) *            | ATAAGGCTCACGACTCTAATAAGTTGACAAGTGCTTTATGGCTTGGAGGACATTACGGAG          | 248 |
| V6 (2)              | ATAAGGCTCACGACTCTAATAAGTTGACAAGTGCTTTATGGCTTGGAGGACATTACGGAG          | 248 |
| V7 (1)              | ATAAGGCTCACGACTCTAATAAGTTGACAAGTGCTTTATGGCTTGGAGGACATTACGGAG          | 248 |
| V8 (1)              | ATAAGGCTCACGACTCTAATAAGTTGACAAGTGCTTTATGGCTTGGAGGACATTACGGAG          | 248 |
| V9 (1) *            | ATAAGGCTCACGACTCTAATAAGTTGACAAGTGCTTTATGGCTTGGAGGACATTACGGAG          | 248 |
| V10 (5)             | ATAAGGCTCACGACTCTAATAAGTTGACAAGTGCTTTATGGCTTGGAGGACATTACGGAG          | 248 |
| V11 (3)             | ATAAGGCTCACGACTCTAATAAGTTGACAAGTGCTTTATGGCTTGGAGGACATTACGGAG          | 248 |
| V12 (1)             | ATAAGGCTCACGACTCTAATAAGTTGACAAGTGCTTTATGGCTTGGAGGACATTACGGAG          | 248 |
| V13 (1) *           | ATAAGGCTCACGACTCTAATAAGTTGACAAGTGCTTTATGGCTTGGAGGACATTACGGAG<br>***** | 177 |
|                     |                                                                       |     |
| Tp04_0772 (genomic) | GTGACCACATATTTACAAGTGGTTTTGTTGATAACAAGACTAGACAAATAAGGGTTTGGG          | 420 |
| XP_764408 (mRNA)    | GTGACCACATATTTACAAGTGGTTTTGTTGATAACAAGACTAGACAAATAAGGGTTTGGG          | 358 |
| V1 (3)              | GTGACCACATATTTACAAGTGGTTTTGTTGATAACAAGACTAGACAAATAAGGGTTTGGG          | 308 |
| V2 (1)              | GTGACCACATATTTACAAGTGGTTTTGTTGATAACAAGACTAGACAAATAAGGGTTTGGG          | 308 |
| V3 (1)              | GTGACCACATATTTACAAGTGGTTTTGTTGATAACAAGACTAGACAAATAAGGGTTTGGG          | 308 |
| V4 (1)              | GTGACCACATATTTACAAGTGGTTTTGTTGATAACAAGACTAGACAAATAAGGGTTTGGG          | 279 |
| V5 (1) *            | GTGACCACATATTTACAAGTGGTTTTGTTGATAACAAGACTAGACAAATAAGGGTTTGGG          | 308 |
| V6 (2)              | GTGACCACATATTTACAAGTGGTTTTGTTGATAACAAGACTAGACAAATAAGGGTTTGGG          | 308 |
| V7 (1)              | GTGACCACATATTTACAAGTGGTTTTGTTGATAACAAGACTAGACAGATAAGGGTTTGGG          | 308 |
| V8 (1)              | GTGACCACATATTTACAAGTGGTTTTGTTGATAACAAGACTAGACAGATAAGGGTTTGGG          | 308 |
| V9 (1) *            | GTGACCACATATTTACAAGTGGTTTTGTTGATAACAAGACTAGACAAATAAGGGTTTGGG          | 308 |
| V10 (5)             | GTGACCACATATTTACAAGTGGTTTTGTTGATAACAAGACTAGACAAATAAGGGTTTGGG          | 308 |
| V11 (3)             | GTGACCACATATTTACAAGTGGTTTTGTTGATAACAAGACTAGACAAATAAGGGTTTGGG          | 308 |
| V12 (1)             | GTGACCACATATTTACAAGTGGTTTTGTTGATAACAAGACTAGACAAATAAGGGTTTGGG          | 308 |
| V13 (1) *           | GTGACCACATATTTACAAGTGGTTTTGTTGATAACAAGACTAGACAAATAAGGGTTTGGG<br>***** | 237 |

|                     |                                                              |     |
|---------------------|--------------------------------------------------------------|-----|
| Tp04_0772 (genomic) | ACACGAGGAAACTCGAGAAACACTTGATTTCCAATGATATTGACAGTTCGCCTTCTCCCT | 480 |
| XP_764408 (mRNA)    | ACACGAGGAAACTCGAGAAACACTTGATTTCCAATGATATTGACAGTTCGCCTTCTCCCT | 418 |
| V1 (3)              | ACACGAGGAAACTCGAGAAACACTTGATTTCCAATGATATTGACAGTTCGCCTTCTCCCT | 368 |
| V2 (1)              | ACACGAGGAAACTCGAGAAACACTTGATTTCCAATGATATTGACAGTTCGCCTTCTCCCT | 368 |
| V3 (1)              | ACACGAGGAAACTCGAGAAACACTTGATTTCCAATGATATTGACAGTTCGCCTTCTCCCT | 368 |
| V4 (1)              | ACACGAGGAAACTCGAGAAACACTTGATTTCCAATGATATTGACAGTTCGCCTTCTCCCT | 339 |
| V5 (1) *            | ACACGAGGAAACTCGAGAAACACTTGATTTCCAATGATATTGACAGTTCGCCTTCTCCCC | 368 |
| V6 (2)              | ACACGAGGAAACTCGAGAAACACTTGATTTCCAATGATATTGACAGCTCGCCTTCTCCCT | 368 |
| V7 (1)              | ACACGAGGAAACTCGAGAAACACTTTATTTCCAATGATATTGACAGCTCGCCTTCTCCCT | 368 |
| V8 (1)              | ACACGAGGAAACTCGAGAAACACTTGATTTCCAATGATATTGACAGCTCGCCTTCTCCCT | 368 |
| V9 (1) *            | ACACGAGGAAACTCGAGAAACACTTGATTTCCAATGATATTGACAGTTCGCCTTCTCCCT | 368 |
| V10 (5)             | ACACGAGGAAACTCGAGAAACACTTGATTTCCAATGATATTGACAGTTCGCCTTCTCCCT | 368 |
| V11 (3)             | ACACGAGGAAACTCGAGAAACACTTGATTTCCAATGATATTGACAGCTCGCCTTCTCCCT | 368 |
| V12 (1)             | ACACGAGGAAACTCGAGAAACACTTGATTTCCAATGATATTGACAGCTCGCCTTCTCCCT | 368 |
| V13 (1) *           | ACACGAGGAAACTCGAGAAACACTTGATTTCCAATGATATTGACAGCTCGCCTTCTCCCT | 297 |
|                     | *****                                                        |     |

|                     |                                                              |     |
|---------------------|--------------------------------------------------------------|-----|
| Tp04_0772 (genomic) | TGATTCCACACTGGGATCCTCAAATTGGGTTGGTTGTCCTCGCTTCAAAGGTTAATTTCT | 540 |
| XP_764408 (mRNA)    | TGATTCCACACTGGGATCCTCAAATTGGGTTGGTTGTCCTCGCTTCAAAGG-----     | 469 |
| V1 (3)              | TGATTCCACACTGGGATCCTCAAATTGGGTTGGTTGTCCTCGCTTCAAAGGTTAATTTCT | 428 |
| V2 (1)              | TGATTCCACACTGGGATCCCCAAATTGGGTTGGTTGTCCTCGCTTCAAAGGTTAATTTCT | 428 |
| V3 (1)              | TGATTCCACACTGGGATCCTCAAATTGGGTTGGTTGTCCTCGCTTCAAAGGTTAATTTCT | 428 |
| V4 (1)              | TGATTCCACACTGGGATCCTCAAATTGGGTTGGTTGTCCTCGCTTCAAAGGTTAATTTCT | 399 |
| V5 (1) *            | TGATTCCACACTGGGATCCTCAAATTGGGTTGGTTGTCCTCGCTTCAAAGGTTAATTTCT | 428 |
| V6 (2)              | TGATTCCACACTGGGATCCTCAAATTGGGTTGGTTGTCCTCGCTTCAAAGGTTAATTTCT | 428 |
| V7 (1)              | TGATTCCACACTGGGATCCCCAAATTGGGTTGGTTGTCCTCGCTTCAAAGGTTAATTTCT | 428 |
| V8 (1)              | TGATTCCACACTGGGATCCCCAAATTGGGTTGGTTGTCCTCGCTTCAAAGGTTAATTTCT | 428 |
| V9 (1) *            | TGATTCCACACTGGGATCCTCAAATTGGGTTGGTTGTCCTCGCTTCAAAGGTTAATTTCT | 428 |
| V10 (5)             | TGATTCCACACTGGGATCCTCAAATTGGGTTGGTTGTCCTCGCTTCAAAGGTTAATTTCT | 428 |
| V11 (3)             | TGATTCCACACTGGGATCCTCAAATTGGGTTGGTTGTCCTCGCTTCAAAGGTTAATTTCT | 428 |
| V12 (1)             | TGATTCCACACTGGGATCCTCAAATTGGGTTGGTTGTCCTCGCTTCAAAGGTTAATTTCT | 428 |
| V13 (1) *           | TGATTCCACACTGGGATCCTCAAATTGGGTTGGTTGTCCTCGCTTCAAAGGTTAATTTCT | 357 |
|                     | *****                                                        |     |

|                     |                                                              |     |
|---------------------|--------------------------------------------------------------|-----|
| Tp04_0772 (genomic) | TCATTAACAAATT-TCTTTAGGGAGACTTAACAGTCAGAATCTTCCAATACATTGATAAG | 599 |
| XP_764408 (mRNA)    | -----GAGACTTAACAGTCAGAATCTTCCAATACATTGATAAG                  | 507 |
| V1 (3)              | TCATTAACAAATT-TCTTTAGGGAGACTTAACAGTCAGAATCTTCCAATACATTGATAAG | 487 |
| V2 (1)              | TCATTAACAAATT-TCTTTAGGGAGACTTAACAGTCAGAATCTTCCAATACATTGATAAG | 487 |
| V3 (1)              | TTATTAACAAATT-TCTTTAGGGAGACTTAACAGTCAGAATCTTCCAATACATTGATAAG | 487 |
| V4 (1)              | TCATTAACAAATT-TCTTTAGGGAGACTTAACAGTCAGAATCTTCCAATACATTGATAAG | 457 |
| V5 (1) *            | TCATTAACAAATT-TTTTTAGGGAGACTTAACAGTCAGAATCTTCCAATACATTGATAAG | 487 |

|                     |                                                               |     |
|---------------------|---------------------------------------------------------------|-----|
| V6 (2)              | TCATTAACAAATT-TCTTTAGGGGAGACTTAACAGTCAGAATCTTCCAATACATTGATAAG | 487 |
| V7 (1)              | TCATTAACAAATT-TCTTTAGGGGAGACTTAACAGTCAGAATCTTCCAATACATTGATAAG | 487 |
| V8 (1)              | TCATTAACAAATT-TCTTTAGGGGAGACTTAACAGTCAGAATCTTCCAATACATTGATAAG | 487 |
| V9 (1) *            | TCATTAACAAATT-TCTTTAGGGGAGACTTAACAGTCAGAATCTTCCAATACATTGATAAG | 487 |
| V10 (5)             | TCATTAACAAATT-TCTTTAGGGGAGACTTAACAGTCAGAATCTTCCAATACATTGATAAG | 487 |
| V11 (3)             | TCATTAACAAATT-TTTTTAGGGGAGACTTAACAGTCAGAATCTTCCAATACATTGATAAG | 487 |
| V12 (1)             | TCATTAACAAATT-TTTTTAGGGGAGACTTAACAGTCAGAATCTTCCAATACATTGATAAG | 487 |
| V13 (1) *           | TTATTAACAAATT-TCTTTAGGGGAGACTTAACAGTCAGAATCTTCCAATACATTGATAAG | 416 |
|                     | *****                                                         |     |
| Tp04_0772 (genomic) | GAGCTAAACAGGGCGGGAGAGTTCAAAGCCACAGGTTCCATGAAGTCCTTCTGTTTAGTA  | 659 |
| XP_764408 (mRNA)    | GAGCTAAACAGGGCGGGAGAGTTCAAAGCCACAGGTTCCATGAAGTCCTTCTGTTTAGTA  | 567 |
| V1 (3)              | GAGCTAAACAGGGCGGGAGAGTTCAAAGCCACAGGTTCCATGAAGTCCTTCTGTTTAGTA  | 547 |
| V2 (1)              | GAGCTAAACAGGGCGGGAGAATTCAAAGCCACAGGTTCCATGAAGTCCTTCTGTTTAGTA  | 547 |
| V3 (1)              | GAGCTAAACAGGGCGGGAGAGTTCAAAGCCACAGGTTCCATGAAGTCCTTCTGTTTAGTA  | 547 |
| V4 (1)              | GAGCTAAACAGGGCGGGAGAGTTCAAAGCCACGGGTTCCATGAAGTCCTTCTGTTTAGTA  | 517 |
| V5 (1) *            | GAGCTAAACAGGGCGGGA-----                                       | 505 |
| V6 (2)              | GAGCTAAACAGGGCGGGAGAGTTCAAAGCCACAGGTTCCATGAAGTCCTTCTGTTTAGTA  | 547 |
| V7 (1)              | GAGCTAAACAGGGCGGGAGAGTTCAAAGCCACGGGTTCCATGAAGTCCTTCTGTTTAGTA  | 547 |
| V8 (1)              | GAGCTAAACAGGGCGGGAGAGTTCAAAGCCACGGGTTCCATGAAGTCCTTCTGTTTAGTA  | 547 |
| V9 (1) *            | GAGCTAAACAGGGCGGGAGAGTTCAAAGCCACAGGTTCCATGAAGTCCTTCTGTTTAGTA  | 547 |
| V10 (5)             | GAGCTAAACAGGGCGGGAGAGTTCAAAGCCACAGGTTCCATGAAGTCCTTCTGTTTAGTA  | 547 |
| V11 (3)             | GAGCTAAACAGGGCGGGAGAGTTCAAAGCCACAGGTTCCATGAAGTCCTTCTGTTTAGTA  | 547 |
| V12 (1)             | GAGCTAAACAGGGCGGGAGAGTTCAAAGCCACAGGTTCCATGAAGTCCTTCTGTTTAGTA  | 547 |
| V13 (1) *           | GAGCTAAACAGGGCGGGAGAGTTCAAAGCCACAGGTTCCATGAAGTCCTTCTGTTTAGTA  | 476 |
|                     | *****                                                         |     |
| Tp04_0772 (genomic) | CCCCTGATATCTGTGATAAATCGAAGTGTGAATTAGGAAGGTTCTTGTTCAATACTGAT   | 719 |
| XP_764408 (mRNA)    | CCCCTGATATCTGTGATAAATCGAAGTGTGAATTAGGAAGGTTCTTGTTCAATACTGAT   | 627 |
| V1 (3)              | CCCCTGATATCTGTGATAAATCGAAGTGTGAATTAGGAAGGTTCTTGTTCAATACTGAT   | 607 |
| V2 (1)              | CCCCTGATATCTGTGATAAATCGAAGTGTGAATTAGGAAGGTTCTTGTTCAATACTGAT   | 607 |
| V3 (1)              | CCCCTGATATCTGTGATAAATCGAAGTGTGAATTAGGAAGGTTCTTGTTCAATACTGAT   | 607 |
| V4 (1)              | CCCCTGATATCTGTGATAAATCGAAGTGTGAATTAGGAAGGTTCTTGTTCAATACTGAT   | 577 |
| V5 (1) *            | -----                                                         | 505 |
| V6 (2)              | CCCCTGATATCTGTGATAAATCGAAGTGTGAATTAGGAAGGTTCTTGTTCAATACTGAT   | 607 |
| V7 (1)              | CCCCTGATATCTGTGATAAATCGAAGTGTGAATTAGGAAGGTTCTTGTTCAATACTGAT   | 607 |
| V8 (1)              | CCCCTGATATCTGTGATAAATCGAAGTGTGAATTAGGAAGGTTCTTGTTCAATACTGAT   | 607 |
| V9 (1) *            | CCCCTGATATCTGTGATAAATCGAAGTGTGAATTAGGAAGGTTCTTGTTCAATACTGAT   | 607 |
| V10 (5)             | CCCCTGATATCTGTGATAAATCGAAGTGTGAATTAGGAAGGTTCTTGTTCAACTGAT     | 607 |
| V11 (3)             | CCCCTGATATCTGTGATAAATCGAAGTGTGAATTAGGAAGGTTCTTGTTCAATACTGAT   | 607 |
| V12 (1)             | CCCCTGATATCTGTGATAAATCGAAGTGTGAATTAGGAAGGTTCTTGTTCAATACTGAT   | 607 |



|                     |                                                                |     |
|---------------------|----------------------------------------------------------------|-----|
| V13 (1) *           | CCCCTGATATCTGTGATAAATCGAAGTGTGAATTAGGAAGGTTCTTGTTCAATACTGAT    | 536 |
|                     |                                                                |     |
| Tp04_0772 (genomic) | TGCAAGCAGATAAAATCTTACATCCATGTTTCATCATAAGGAGGAATTCTGCAACAACAATG | 779 |
| XP_764408 (mRNA)    | TGCAAGCAGATAAAATCTTACATCCATGTTTCATCATAAGGAGGAATTCTGCAACAACAATG | 687 |
| V1 (3)              | TGCAAGCAGATAAAATCTTACATCCATGTTTCATCATAAGGAGGAATTCTGCAACAACAATG | 667 |
| V2 (1)              | TGCAAGCAGATAAAATCTTACATCCATGTTTCATCATAAGGAGGAATTCTGCAACAACAATG | 667 |
| V3 (1)              | TGCAAGCAGATAAAATCTTACATCCATGTTTCATCATAAGGAGGAATTCTGCAACAACAATG | 667 |
| V4 (1)              | TGCAAGCAGATAAAATCTTACATCCATGTTTCATCATAAGGAGGAATTCTGCAACAACAATG | 637 |
| V5 (1) *            | -----                                                          | 505 |
| V6 (2)              | TGCAAGCAGATAAAATCTTACATCCATGTTTCATCATAAGGAGGAATTCTGCAACAACAATG | 667 |
| V7 (1)              | TGCAAGCAGATAAAATCTTACATCCATGTTTCATCATAAGGAGGAATTCTGCAACAACAATG | 667 |
| V8 (1)              | TGCAAGCAGATAAAATCTTACATCCATGTTTCATCATAAGGAGGAATTCTGCAACAACAATG | 667 |
| V9 (1) *            | TGCAAGCAGATAAAATCTTACATCCATGTTTCATCATAAGGAGGAATTCTGCAACAACAATG | 667 |
| V10 (5)             | TGCAAGCAGATAAAATCTTACATCCATGTTTCATCATAAGGAGGAATTCTGCAACAACAATG | 667 |
| V11 (3)             | TGCAAGCAGATAAAATCTTACATCCATGTTTCATCATAAGGAGGAATTCTGCAACAACAATG | 667 |
| V12 (1)             | TGCAAGCAGATAAAATCTTACATCCATGTTTCATCATAAGGAGGAATTCTGCAACAACAATG | 667 |
| V13 (1) *           | TGCAAGCAGATAAAATCTTACATCCATGTTTCATCATAAGGAGGAATTCTGCAACAACAATG | 596 |
|                     |                                                                |     |
| Tp04_0772 (genomic) | AACGAACTTTACGGAGAGGAGTACGATACTGCAAGGTATTCAGTCCGTGACTGGGAAGCA   | 839 |
| XP_764408 (mRNA)    | AACGAACTTTACGGAGAGGAGTACGATACTGCAAGGTATTCAGTCCGTGACTGGGAAGCA   | 747 |
| V1 (3)              | AACGAACTTTACGGAGAGGAGTACGATACTGCAAGGTATTCAGTCCGTGACTGGGAAGCA   | 727 |
| V2 (1)              | AACGAACTTTACGGAGAGGAGTATGATACTGCAAGGTATTCAGTCCGTGACTGGGAAGCA   | 727 |
| V3 (1)              | AACGAACTTTACGGAGAGGAGTACGATACTGCAAGGTATTCAGTCCGTGACTGGGAAGCA   | 727 |
| V4 (1)              | AACGAACTTTACGGAGAGGAGTACGATACTGCAAGGTATTCAGTCCGTGACTGGGAAGCA   | 697 |
| V5 (1) *            | -----                                                          | 505 |
| V6 (2)              | AACGAACTTTACGGAGAGGAGTACGATACTGCAAGGTATTCAGTCCGTGACTGGGAAGCA   | 727 |
| V7 (1)              | AACGAACTTTACGGAGAGGAGTACGATACTGCAAGGTATTCAGTCCGTGACTGGGAAGCA   | 727 |
| V8 (1)              | AACGAACTTTACGGAGAGGAGTACGATACTGCAAGGTATTCAGTCCGTGACTGGGAAGCA   | 727 |
| V9 (1) *            | AACGAACTTTA-----                                               | 678 |
| V10 (5)             | AACGAACTTTACGGAGAGGAGTACGATACTGCAAGGTATTCAGTCCGTGACTGGGAAGCA   | 727 |
| V11 (3)             | AACGAACTTTACGGAGAGGAGTACGATACTGCAAGGTATTCAGTCCGTGACTGGGAAGCA   | 727 |
| V12 (1)             | AACGAACTTTACGGAGAGGAGTACGATACTGCAAGGTATTCAGTCCGTGACTGGGAAGCA   | 727 |
| V13 (1) *           | AACGAACTTTACGGAGAGGAGTACGATACTGCAAGGTATTCAGTCCGTGACTGGGAAGCA   | 656 |
|                     |                                                                |     |
| Tp04_0772 (genomic) | GGACTTGAGAAGAACTTGGGTCTGTCTGACAATAACCAAAAACAAATGCGCCCAAATCATC  | 899 |
| XP_764408 (mRNA)    | GGACTTGAGAAGAACTTGGGTCTGTCTGACAATAACCAAAAACAAATGCGCCCAAATCATC  | 807 |
| V1 (3)              | GGACTTGAGAAGAACTTGGGTCTGTCTGACAATAACCAAAAACAAATGCGCCCAAATCATC  | 787 |
| V2 (1)              | GGACTTGAGAAGAACTTGGGTCTGTCTGACAATAACCAAAAACAAATGCGCCCAAATCATC  | 787 |

|                     |                                                                       |      |
|---------------------|-----------------------------------------------------------------------|------|
| V3 (1)              | GGACTTGAGAAGAACTTGGGTCGTCTGACAATAACCAAAAAACAAATGCGCCCAAATCATC         | 787  |
| V4 (1)              | GGACTTGAGAAGAACTTGGGTCGTCTGACAATAACCAAGAACAAATGCGCCCAAATCATC          | 757  |
| V5 (1) *            | -----                                                                 | 505  |
| V6 (2)              | GGACTTGAGAAGAACTTGGGTCGTCTGACAATAACCAAAAAACAAATGCGCCCAAATCATC         | 787  |
| V7 (1)              | GGACTTGAGAAGAACTTGGGTCGTCTGACAATAACCAAAAAACAAATGCGCGCAAATCATC         | 787  |
| V8 (1)              | GGACTTGAGAAGAACTTGGGTCGTCTGACAATAACCAAAAAACAAATGCGCGCAAATCATC         | 787  |
| V9 (1) *            | -----                                                                 | 678  |
| V10 (5)             | GGACTTGAGAAGAACTTGGGTCGTCTGACAATAACCAAAAAACAAATGCGCCCAAATCATC         | 787  |
| V11 (3)             | GGACTTGAGAAGAACTTGGGTCGTCTGACAATAACCAAAAAACAAATGCGCCCAAATCATC         | 787  |
| V12 (1)             | GGACTTGAGAAGAACTTGGGTCGTCTGACAATAACCAAAAAACAAATGCGCCCAAATCATC         | 787  |
| V13 (1) *           | GGACTTGAGAAGAACTTGGGTCGTCTGACAATAACCAAAAAACAAATGCGCCCAAATCATC         | 716  |
|                     |                                                                       |      |
| Tp04_0772 (genomic) | AAAGATAAGGTTTGTGCAGAATCTTTATATTACTTTAGGATGCTGGATGCAAGTTCAGGG          | 959  |
| XP_764408 (mRNA)    | AAAGATAAGGTTTGTGCAGAATCTTTATATTACTTTAGGATGCTGGATGCAAGTTCAGGG          | 867  |
| V1 (3)              | AAAGATAAGGTTTGTGCAGAATC-----                                          | 810  |
| V2 (1)              | AAAGATAAGGTTTGTGCAGA-----                                             | 807  |
| V3 (1)              | AAAGATAAGGTTTGTGCAGTATCGTTATATTACTT-----                              | 822  |
| V4 (1)              | AAAGATAAGGTTTGTG-----                                                 | 773  |
| V5 (1) *            | -----                                                                 | 505  |
| V6 (2)              | AAAGATAAGGTTTGTGCCGAATCGTTATATTACTTA-----                             | 823  |
| V7 (1)              | AAAGATAAGGTTTGTGCAGAATCGTTATATT-----                                  | 818  |
| V8 (1)              | AAAGATAAGGTTTGTGCAGAATCGTTATATTACTTTA-----                            | 824  |
| V9 (1) *            | -----                                                                 | 678  |
| V10 (5)             | AAAGATAAGGTTTGTGCAGAATCGTTATATTACTTTA-----                            | 824  |
| V11 (3)             | AAAGATAAGGTTTGTGCAGAATCCTTATATTACTTTA-----                            | 824  |
| V12 (1)             | AAAGATAAGGTTTGTGCAGAATCCTTATATTACTTAG-----                            | 824  |
| V13 (1) *           | AAAGATAAGGTTTGTGCAG-----                                              | 735  |
|                     |                                                                       |      |
| Tp04_0772 (genomic) | AGATTTCCAAAA <u>CCATCCAGGAGTGTAATGCC</u> AAATACGGAACCAACTTTAACAATCCAG | 1019 |
| XP_764408 (mRNA)    | AGATTTCCAAAAACCATCCAGGAGTGTAATGCCAAATACGGAACCAACTTTAACAATCCAG         | 927  |
| V1 (3)              | -----                                                                 | 810  |
| V2 (1)              | -----                                                                 | 807  |
| V3 (1)              | -----                                                                 | 822  |
| V4 (1)              | -----                                                                 | 773  |
| V5 (1) *            | -----                                                                 | 505  |
| V6 (2)              | -----                                                                 | 823  |
| V7 (1)              | -----                                                                 | 818  |
| V8 (1)              | -----                                                                 | 824  |
| V9 (1) *            | -----                                                                 | 678  |

|           |       |     |
|-----------|-------|-----|
| V10 (5)   | ----- | 824 |
| V11 (3)   | ----- | 824 |
| V12 (1)   | ----- | 824 |
| V13 (1) * | ----- | 735 |

Primer regions are in bold, underlined and italicized text.

\* Partial sequence as defined by only having either the forward or reverse sequence of the allele available for analysis. This sequence is its own variant due to unique nucleotides.

Table S12b: Tp10 protein variant Clustal alignment

|           |                                                                |     |
|-----------|----------------------------------------------------------------|-----|
| XP_764408 | MKVTNLKWNPTVDYALLTTSFDC TAKVWDASNGKELFSTSIGEHPSSCSWTPNGDKILVS  | 60  |
| V1 (16)   | -----DASNGKELFSTSIGEHPSSCSWTPNGDKILVS                          | 32  |
| V2 (1)    | -----FRDASNGKELFSTSIGEHPSSCSWTPNGDKILVS                        | 34  |
| V3 (1)    | -----DASNGKELFSTSIGEHPSSCSWTPNGDKILVS                          | 32  |
| V4 (1)    | -----FRDASNGKELFSTSIGEHPSSCSWTPNGDKILVS                        | 34  |
| V5 (2)    | -----DASNGKELFSTSIGEHPSSCSWTPNGDKILVS                          | 32  |
| V6 (1)    | -----FRDASNGKELFSTSIGEHPSSCSWTPNGDKILVS                        | 34  |
|           | *****                                                          |     |
| XP_764408 | TKEANVSLIDPRSGNCCSKYKAHDSNKLTSALWLG GHYGGDHIFTSGFVDNKTRQIRVWD  | 120 |
| V1 (16)   | TKEANVSLIDPRSGNCCSKYKAHDSNKLTSALWLG GHYGGDHIFTSGFVDNKTRQIRVWD  | 92  |
| V2 (1)    | TKEANVSLIDPRSGNCCIKYKAHDSNKLTSALWLG GHYGGDHIFTSGFVDNKTRQIRVWD  | 94  |
| V3 (1)    | TKEANVSLIDPRSGNCCIKYKAHDSNKLTSALWLG GHYGGDHIFTSGFVDNKTRQIRVWD  | 92  |
| V4 (1)    | TKEANVSLIDPRSGNCCSKYKAHDSNKLTSALWLG GHYGGDHIFTSGFVDNKTRQIRVWD  | 94  |
| V5 (2)    | TKEANVSLIDPRSGNCCSKYKAHDSNKLTSALWLG GHYGGDHIFTSGFVDNKTRQIRVWD  | 92  |
| V6 (1)    | TKEANVSLIDPRSGNCCSKYKAHDSNKLTSALWLG GHYGGDHIFTSGFVDNKTRQIRVWD  | 94  |
|           | *****                                                          |     |
| XP_764408 | TRKLEKHLISNDIDSSPSPLIPHWD PQIGLVVLASKGDLTVRIFQYIDKELNRAGEFKAT  | 180 |
| V1 (16)   | TRKLEKHLISNDIDSSPSPLIPHWD PQIGLVVLASKGDLTVRIFQYIDKELNRAGEFKAT  | 152 |
| V2 (1)    | TRKLEKHFISNDIDSSPSPLIPHWD PQIGLVVLASKGDLTVRIFQYIDKELNRAGEFKAT  | 154 |
| V3 (1)    | TRKLEKHLISNDIDSSPSPLIPHWD PQIGLVVLASKGDLTVRIFQYIDKELNRAGEFKAT  | 152 |
| V4 (1)    | TRKLEKHLISNDIDSSPSPLIPHWD PQIGLVVLASKGDLTVRIFQYIDKELNRAGEFKAT  | 154 |
| V5 (2)    | TRKLEKHLISNDIDSSPSPLIPHWD PQIGLVVLASKGDLTVRIFQYIDKELNRAGEFKAT  | 152 |
| V6 (1)    | TRKLEKHLISNDIDSSPSPLIPHWD PQIGLVVLASKGDLTVRIFQYIDKELNRAGEFKAT  | 154 |
|           | *****                                                          |     |
| XP_764408 | GSMKSFCLVPTDIDCKSKCELGRFLFNTDCKQINL TSMFI IRRNSATTMNELYGEEYDTA | 240 |
| V1 (16)   | GSMKSFCLVPTDIDCKSKCELGRFLFNTDCKQINL TSMFI IRRNSATTMNELYGEEYDTA | 212 |
| V2 (1)    | GSMKSFCLVPTDIDCKSKCELGRFLFNTDCKQINL TSMFI IRRNSATTMNELYGEEYDTA | 214 |
| V3 (1)    | GSMKSFCLVPTDIDCKSKCELGRFLFNTDCKQINL TSMFI IRRNSATTMNELYGEEYDTA | 212 |
| V4 (1)    | GSMKSFCLVPTDIDCKSKCELGRFLFNTDCKQINL TSMFI IRRNSATTMNELYGEEYDTA | 214 |
| V5 (2)    | GSMKSFCLVPTDIDCKSKCELGRFLFNTDCKQINL TSMFI IRRNSATTMNELYGEEYDTA | 212 |
| V6 (1)    | GSMKSFCLVPTDIDCKSKCELGRFLFNTDCKQINL TSMFI IRRNSATTMNELYGEEYDTA | 214 |
|           | ***** *                                                        |     |

|           |                                                              |     |
|-----------|--------------------------------------------------------------|-----|
| XP_764408 | RYSVRDWEAGLEKNLGRLTITKNKCAQIIKDKVCAESLYYFRMLDASSGRFPKPSRSVMP | 300 |
| V1 (16)   | RYSVRDWEAGLEKNLGRLTITKNKCAQIIKDKVCAESLYYFR-----              | 254 |
| V2 (1)    | RYSVRDWEAGLEKNLGRLTITKNKCAQIIKDKVCAESLY-----                 | 253 |
| V3 (1)    | RYSVRDWEAGLEKNLGRLTITKNKCAQIIKDKVCAESLYYF-----               | 253 |
| V4 (1)    | RYSVRDWEAGLEKNLGRLTITKNKCAQIIKDKVCAVSLYY-----                | 254 |
| V5 (2)    | RYSVRDWEAGLEKNLGRLTITKNKCAQIIKDKVCAESLYYL-----               | 253 |
| V6 (1)    | RYSVRDWEAGLEKNLGRLTITKNKCAQIIKDKVCAEP-----                   | 251 |
|           | *****                                                        |     |

Eptiope region lies outside of sequenced region.
